# Supplementary material for: The White-Nose Syndrome Transcriptome: Activation of Anti-fungal Host Responses in Wing Tissue of Hibernating Little Brown Myotis
Source: PubMed Central journal article supplement (PMC4591128; doi:10.1371/journal.ppat.1005168), 2015-10-01

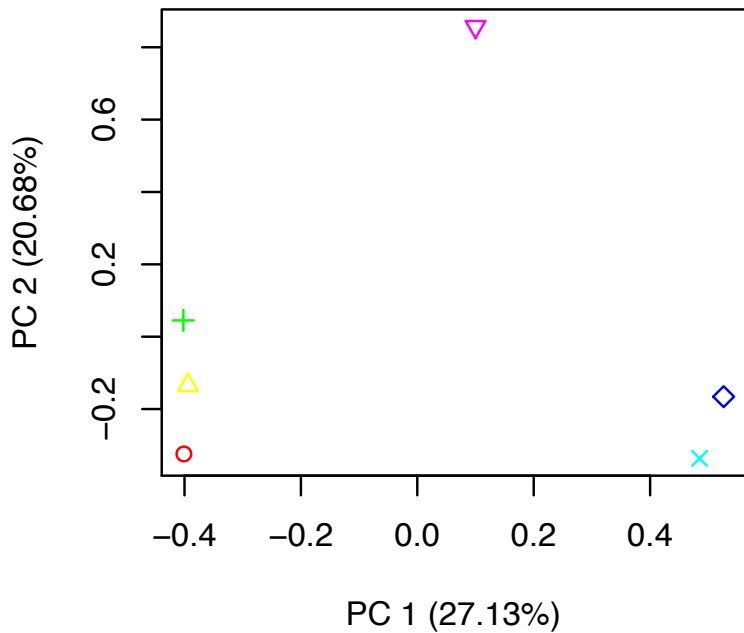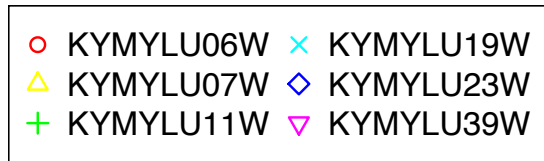

Supplement: ppat.1005168.s002.pdf [file ppat.1005168.s002.pdf]
