# Supplementary material for: The White-Nose Syndrome Transcriptome: Activation of Anti-fungal Host Responses in Wing Tissue of Hibernating Little Brown Myotis
Source: PLoS Pathog. 2015 Oct 1;11(10):e1005168. doi: 10.1371/journal.ppat.1005168 (PMC4591128; doi:10.1371/journal.ppat.1005168)
Supplement: S5 Table — (XLSX) [file ppat.1005168.s007.xlsx]

## Sheet: DESeq2.PCA.rlog.rotations.csv
	PC1	PC2	PC3	PC4	PC5	PC6	PC7	PC8	PC9	PC10	PC11
HCAR2_HUMAN	-0.0176597	0.0721629	-0.00960967	0.0323467	-0.0335809	0.0293444	-0.0688308	0.0135079	-0.0230493	0.0104204	-0.0297432
CS012_BOVIN	-0.0653046	0.0713167	0.00469691	0.213998	-0.0743661	-0.00913043	0.0340702	0.0446761	0.0278053	0.0157906	0.0259392
1C01_GORGO	-0.0427239	0.0685416	-0.0431892	0.0853047	-0.0213691	-0.0118013	-0.0771031	-0.0611542	0.00698383	-0.0151756	0.092823
FOSB_HUMAN	-0.0476058	0.0640902	0.0201661	-0.033301	0.0117863	0.01208	-0.0383915	-0.0192789	0.0128425	0.00773811	-0.0149278
CCL2_MOUSE	-0.0706685	0.0638758	-0.0962548	0.0573339	-0.0636237	0.0440192	-0.0199519	-0.0967157	-0.0342748	0.0483948	0.040414
IL6_HORSE	-0.0537187	0.0614341	-0.0685061	0.027664	-0.0205316	0.0268137	0.0617139	-0.0425167	-0.0572522	0.0782335	0.0127162
SCMC2_BOVIN	-0.0157883	0.0606901	-0.0199608	-0.021996	0.0142923	-0.0126273	-0.0140309	-0.00990469	-0.0241831	0.00729452	-0.00707981
LYAM1_PANTR	-0.0473207	0.0591883	-0.0316386	0.0462972	-0.0376352	-0.0363668	-0.0490165	0.00334694	0.00959571	-0.0125693	0.0077807
IL24_HUMAN	-0.0692047	0.0588742	-0.0686523	0.00168327	0.000108501	-0.0379821	0.023659	-0.0373061	0.0101999	0.0195249	0.0140434
NR4A1_CANFA	-0.0309021	0.0584445	0.0201627	-0.0174064	0.0365117	0.0145387	-0.00650559	-0.00187804	0.0133392	-0.042878	-0.0202231
CCL2_HORSE	-0.061822	0.0576583	0.0519031	0.0850707	-0.0400576	0.049077	-0.0259591	0.00211116	-0.0674859	-0.135046	-0.00260065
HCAR3_HUMAN	-0.00637472	0.0573209	-0.0390138	0.0450688	-0.0117038	0.0480735	-0.0440311	-0.0222647	-0.00545317	0.0177153	0.0186162
EGR1_HUMAN	-0.0421613	0.0572357	-0.00781894	-0.0247638	-0.0347771	-0.0579279	-0.00448565	-0.0447838	0.0789948	0.0301772	-0.00465791
CSRN1_HUMAN	-0.00117996	0.0557117	-0.0247424	-0.0210288	-0.0247835	-0.0101575	-0.0197405	-0.0298613	0.052612	-0.0120003	-0.0245425
LYAM2_CANFA	-0.0174479	0.0556241	-0.0308911	0.0676521	0.0154415	0.0102027	0.0316284	-0.0284168	-0.028496	0.00404138	0.00199842
RND1_HUMAN	-0.0455302	0.0544579	-0.0202161	0.0272216	-0.0175001	0.00497402	-0.00357137	-0.0557397	-0.0462817	0.0275723	0.0140404
PGH2_RABIT	-0.0767174	0.0521117	-0.0480797	-0.0956162	-0.0583202	-0.0417398	0.036435	0.0341814	0.0379626	-0.016159	0.00519567
ASAP2_HUMAN	-0.0176317	0.0498801	0.0464141	0.00862056	0.017148	0.0115369	0.0263258	0.0341544	0.0656416	0.00784004	0.0105859
CD177_MOUSE	-0.0309459	0.0487405	-0.0393243	0.0294608	-0.0398404	-0.0243834	-0.0302865	0.0246046	0.008803	-0.016422	-0.0010451
LYAM2_HORSE	-0.0160107	0.0474294	-0.0155093	0.0592425	0.0145546	-0.00061393	0.0423048	-0.0194882	-0.00395872	0.00551227	0.00486342
PLEK_HUMAN	-0.0201731	0.0460587	-0.0113658	0.0560577	-0.0166013	-0.0294732	0.00886897	0.0122716	0.00843015	-0.0223837	-0.000809724
LIRB5_HUMAN	-0.023589	0.0450644	-0.0226376	0.0404572	-0.0221742	-0.00346349	-0.0243127	0.0428352	-0.00940459	-0.0151806	-0.00281984
IFM3_HUMAN	-0.0397779	0.0443311	-0.0428975	0.0421251	-0.0583076	-0.018815	0.0128885	0.0234025	-0.00102732	0.00567148	-0.00155636
CSF3_FELCA	-0.0484303	0.0443309	-0.0772226	0.0419421	0.0169839	0.0072706	0.0400822	-0.0299919	-0.0267744	0.0154043	0.00477533
CCL20_BOVIN	-0.0327204	0.0439983	-0.0461267	0.0297073	-0.0196269	0.00102182	0.0530019	0.0282002	-0.0364884	0.0698388	0.0012488
TRML4_HUMAN	-0.0441002	0.0439607	-0.0491967	0.0636473	-0.0736636	-0.0520732	0.00098492	0.0544684	0.0303702	0.000155603	-0.00496307
NPAL2_MOUSE	-0.00803172	0.0435883	0.00758469	-0.0191308	0.0356389	-0.0224465	-0.0251627	-0.0513776	-0.00618431	-0.00332774	0.0252487
PIM1_HUMAN	-0.00409193	0.0432096	-0.0157832	-0.0266985	-0.00873609	0.0323454	-0.0146636	-0.0109136	0.0274069	-0.00765549	0.0403158
TRBM_CANFA	-0.0202379	0.0427291	-0.00581846	0.00536447	-0.0282207	0.0198386	-0.0282086	-0.0226455	-0.033327	0.0213466	0.0063124
CP4F3_HUMAN	-0.0295083	0.0425677	-0.0102463	0.0255265	-0.00995643	0.00886276	3.05095e-05	0.0301031	0.0149121	0.0105486	0.00131517
LIRA5_HUMAN	-0.0180401	0.0416745	-0.0156551	0.0291941	-0.0192492	0.00862829	-0.022514	0.0213578	-0.0247574	-0.0617249	-0.00212077
CSF3R_HUMAN	-0.0375397	0.0404653	-0.0131709	0.0445456	-0.0152694	-0.000238456	-0.00248512	0.00751547	0.00291537	-0.00658584	0.00373183
GDS1_HUMAN	-0.0205602	0.0403352	-0.00113661	-0.0262479	0.0013382	-0.013113	0.015246	-0.0251548	0.00398295	-0.0102758	-0.0430235
TSG6_RABIT	-0.0289635	0.0403343	-0.0193274	0.0159796	0.00350175	0.0188132	-0.0157106	-0.0199206	-0.0507117	0.0231389	0.00395361
CISH_RAT	-0.0509407	0.0402887	-0.00095424	-0.0277606	-0.0341178	0.0161094	0.00237241	-0.02785	-0.0506371	-0.0224005	-0.0208309
TSP1_HUMAN	-0.013751	0.040118	-0.00742169	0.0531292	-0.00315625	0.0172439	0.00156019	-0.0113974	-0.0401045	-0.00869141	0.00894991
SRGN_HUMAN	-0.00998458	0.0398561	-0.0472021	0.0617425	-0.0560455	0.00657759	-0.0270266	0.0371657	-0.045759	0.00957705	-0.0266189
FOS_BOVIN	-0.041783	0.0385142	-0.00436983	-0.00585282	0.00103499	-0.0180677	0.0431259	-0.0289147	0.0259335	0.0136147	0.040743
ID1_HUMAN	-0.00206632	0.0377003	-0.0267089	-0.0477378	-0.0195664	0.0115107	0.030354	0.00392127	0.0592023	-0.0136467	0.0069022
HCLS1_HUMAN	-0.0318966	0.0374042	-0.00186432	0.0478195	-0.0165895	-0.00374354	0.0059778	0.0193376	0.00166756	-0.00186102	0.000225242
ADML_PIG	-0.00467975	0.0374004	-0.00930942	0.0182348	-0.00900469	0.0238451	0.0266242	-0.0225416	-0.00566017	0.0195347	-0.000418034
TUFT1_PIG	-0.0459977	0.0372275	0.133399	0.010329	0.00501979	0.0641902	-0.049073	0.0180449	0.0736106	0.0399795	0.00825435
SIG14_HUMAN	-0.0241411	0.0371397	-0.0335347	0.0469774	-0.027056	0.000576731	0.00228494	0.0258731	0.00418725	-0.00304417	0.00340294
SRBP2_HUMAN	0.000170821	0.0361307	0.0295262	0.0131902	-0.00698249	0.00987979	0.00207762	-0.0261213	0.00717395	0.0136735	0.0265422
LIRB4_HUMAN	-0.0143382	0.0355655	0.00506914	0.0639492	-0.0171153	-0.0293631	-0.0461247	0.00241662	0.0169775	0.0322542	0.00556237
FLOT1_PIG	-0.0154975	0.0345448	0.00156814	-0.00916462	-0.0676286	-0.0365054	-0.0105441	-0.00247471	-0.0300844	-0.0107757	0.0108235
PHLA2_HUMAN	-0.021916	0.0343054	-0.101073	-0.0471954	-0.0504048	-0.0621448	-0.00828613	0.00615689	0.0409798	0.00829272	-0.0377448
COR1A_BOVIN	-0.0281941	0.0342134	-0.0212194	0.0143833	-0.0440638	0.00502818	-0.0104648	0.0297672	-0.0206936	-0.0286665	0.0044271
ARSJ_MOUSE	-0.0185891	0.0336005	0.00720579	-0.0608465	0.00741847	0.000636111	-0.0134169	-0.0104923	-0.00161147	-0.0490025	0.013985
SMN_CANFA	-0.0217599	0.0335941	0.00442357	-0.0254485	0.0519522	0.0130894	-0.00790603	-0.0944332	-0.0185469	0.0256986	-0.00678148
TTP_SHEEP	0.00301253	0.0333459	-0.0375163	-0.00695201	-0.0296808	0.00791701	-0.0167678	0.00147403	-0.00145917	0.0240991	-0.0376375
CD177_HUMAN	-0.0347219	0.0329432	-0.036221	0.0279744	-0.0170684	0.00453365	-0.0163117	-0.00241285	0.00677948	-0.0166913	-0.00456743
JUNB_BOVIN	-0.00888887	0.0328203	-0.0408838	-0.0371801	-0.0515798	-0.0316052	0.012958	-0.0241124	-0.0128098	0.0126965	0.011408
DNJA1_RAT	-0.0262002	0.0326803	0.0902908	-0.0153506	-0.00201274	-0.0374818	-0.0482205	0.00529649	0.00716333	0.0187943	0.000447819
EMR2_CANFA	-0.0311002	0.0325125	0.0359915	0.0682728	-0.0203854	-0.0216488	-0.0252781	-0.00976372	0.0346814	-0.000993471	0.00236768
SDCB2_HUMAN	-0.0238129	0.0320723	-0.0384288	-0.0647994	-0.0157888	0.0103246	-0.0412901	0.0713947	0.0348101	0.070497	0.0443662
PR15A_BOVIN	-0.0214269	0.0319655	-0.00716501	-0.0230608	-0.0323166	-0.0220835	-0.00798893	-2.07468e-06	0.0611453	0.0154476	-0.000148566
MAFF_BOVIN	0.00445121	0.0318791	-0.0036436	-0.0360354	-0.000834376	-0.0224177	-0.009356	0.0174542	0.0448469	-0.00593152	0.0422082
TM7S3_HUMAN	-0.00617616	0.0314883	0.00374112	-0.0115191	-0.0269313	-0.0342733	-0.0456956	-0.035293	0.0506775	-0.00468595	-0.00753843
S15A3_HUMAN	-0.00786193	0.0311482	-0.00575067	0.0116978	0.00323283	-0.0179043	-0.0172895	0.0364235	0.00727513	-0.00708529	-0.000984398
HMOX1_HUMAN	-0.0126133	0.0309772	-0.0259416	0.0211082	-0.0217234	0.0294602	0.00512121	0.00337561	0.0708185	0.0273084	0.00864411
HS71B_BOVIN	-0.0317034	0.0309227	0.108781	-0.0108511	0.00868329	-0.00270055	-0.0273592	0.00603498	-0.0165657	0.0158822	0.0291497
PAMR1_PONAB	-0.0140183	0.0309022	-0.0503284	0.0338882	-0.00560785	0.00544511	0.0138637	0.0481763	-0.0142838	-0.00272079	-0.00508253
DUS6_HUMAN	-0.00154555	0.0304805	0.0230224	0.00592476	0.0166154	-0.0379719	-0.0228389	-0.00861379	-0.0438817	0.000336146	-0.0341367
ZDH18_HUMAN	-0.0255556	0.0304485	-0.00664832	-0.0120106	-0.0251242	-0.00832698	-0.00245482	-0.00454481	0.0465644	-0.0201185	-0.0086706
SGPP2_MOUSE	-0.0158717	0.0302733	-0.0432347	0.0420638	0.0144746	-0.0177126	0.0261019	0.00211912	-0.0230686	0.000905674	0.00245383
ATF3_RAT	-0.0125126	0.0298305	-0.0420702	-0.024507	-0.00396834	-0.0272296	0.0257902	-0.00764433	0.0112674	0.0500018	-0.0235032
LIRA6_HUMAN	-0.0217966	0.0297122	5.64449e-06	0.0405819	-0.0278724	-0.0113364	-0.0106225	0.00809978	-0.0209975	0.0117089	0.000255832
HXK2_PIG	-0.00480744	0.0293216	0.0238132	-0.00851888	0.00566171	-0.0187636	-0.0397695	-0.017852	-0.0283473	-0.00144006	0.000410038
IL20_MOUSE	-0.0365794	0.0291249	-0.0441213	0.0197996	0.0141664	0.0182369	-0.0223975	-0.0631704	-0.000850898	0.00408324	-0.00323581
HYAS1_MOUSE	-0.0146952	0.0286652	-0.00137262	0.0153463	0.00081525	0.00341006	-0.00529815	-0.0119314	-0.00283614	-0.00411758	0.00220057
IF2G_RAT	-0.00968255	0.0286265	0.0183934	0.00329247	0.0221638	-0.0213638	0.00838237	0.00771835	-0.040459	0.0311707	-0.00654912
RHOB_RAT	-0.0159103	0.0285482	-0.0302244	-0.00642835	-0.00895042	0.0103058	-0.0207035	0.00681583	0.00861692	-0.0216059	-0.0387391
TAD2B_PONAB	-0.0147955	0.0285411	-0.00433607	-0.00823634	-0.0185334	-0.00117597	-0.00553789	-0.0162507	0.0188655	-0.0437857	0.00335009
K2C6A_MOUSE	-0.0155088	0.0283656	-0.0777415	0.0557528	-0.00560769	-0.0242537	0.0028962	0.0364477	-0.00184073	0.00182405	0.0171078
TREM1_BOVIN	-0.0272458	0.0282411	-0.0200752	0.0292479	0.00741704	-0.0075755	0.0294337	-0.00908906	0.00454049	-0.0102363	-0.00864136
WDR26_MOUSE	-0.0127178	0.0281227	-0.026871	0.000148274	-0.00575416	-0.00731919	-0.0110239	0.0319266	-0.0150157	0.00800523	0.000821057
ICAM3_PANTR	-0.00660916	0.0280168	-0.014629	0.0335162	-0.0249892	-0.0177798	-0.0143236	0.0180829	0.00368155	-0.0070883	-0.00289659
DUS1_HUMAN	-0.021761	0.0280006	0.0369762	-0.0442659	-0.0211334	0.0336378	-0.0142961	0.00270342	-0.0279114	-0.00709081	0.00103589
PLAC8_HUMAN	-0.0389934	0.0279848	-0.0628217	0.036064	-0.0218224	0.00311477	-0.00136469	0.00812088	0.00705534	0.0063897	-0.00296115
CLIP2_HUMAN	-0.00948011	0.027881	0.0219973	0.0320745	0.00962708	-0.00970188	0.0228628	-0.0275317	-0.0254694	-0.0248156	0.0427332
M4A8_MOUSE	-0.0179954	0.0277302	-0.00947753	0.0413287	-0.0288396	-0.0216531	-0.0241262	0.0176034	0.00714117	-0.00891738	0.00436248
SIGL5_HUMAN	-0.00962792	0.027389	-0.000111443	0.0182488	-0.00471173	0.0164159	-0.015054	0.0146457	0.0159368	-0.00492357	0.00344077
CPVL_HUMAN	-0.0257649	0.0273212	-0.0220444	0.0398715	-0.0128969	-0.00312989	-0.024934	0.00921129	0.0191877	0.0197631	-0.00724658
CLIP1_HUMAN	-0.0073479	0.0271808	-0.00257392	0.0252799	0.0422902	0.0282727	-0.0104018	-0.00852032	0.0237263	0.00193319	0.0040846
ANGL4_PIG	-0.00633731	0.0270245	0.0393829	-0.00626514	-0.0263186	0.0141386	-0.0039321	0.0116402	0.00787689	0.012774	-0.00637925
FA65B_MOUSE	-0.0131737	0.0265236	-0.00938591	0.0299945	-0.0144805	0.0108918	-0.0314296	-0.0106098	0.00705345	-0.039166	-0.00209386
PAI1_PIG	-0.0102243	0.0262102	-0.064058	-0.00144596	-0.00833115	0.00180191	0.0162939	0.0458789	0.0290929	0.0298019	0.022671
C5AR1_CANFA	-0.0172376	0.0260315	-0.00936316	0.0390255	-0.0298895	-0.0209002	-0.0290766	0.0163539	0.00858778	-0.0152925	0.00545904
TFPI2_BOVIN	-0.0235637	0.0257754	-0.0264205	0.0151199	-0.00462609	0.00869322	0.0156913	0.0290243	-0.0480615	0.0225847	0.0202739
PTRF_HUMAN	-0.00305766	0.0256423	0.00694605	0.0218303	-0.00697267	0.0318324	-0.0176203	0.0140225	0.000288591	-0.0393911	0.042904
SP6_HUMAN	0.000444126	0.0256005	0.0111962	-0.0175053	-0.00439956	0.00607756	-0.0461032	-0.0283342	0.0158312	-0.0334353	0.00700667
VEGFA_PIG	-0.00359477	0.0255904	-0.0171565	-0.0336162	-0.0186121	-0.0144773	0.0206175	0.0537895	0.0365502	-0.0616904	-0.00480197
PILRA_HUMAN	-0.0106002	0.0255597	-0.00952593	0.040416	0.00951635	-0.0141997	-0.0020282	0.0297561	0.00444757	0.0206779	0.00284036
TBB4_CHICK	-0.0131346	0.0253715	0.0491745	-0.0486824	0.00196242	-0.019293	-0.0347756	-0.0494119	-0.0540876	-0.0471426	0.00970713
K2C80_HUMAN	-0.0217048	0.0253452	0.0043543	-0.0084558	0.0120078	0.00953266	0.0258863	-0.00799769	0.0268526	0.00095	0.00475715
RAC2_BOVIN	-0.0290538	0.0253002	-0.0378281	0.0278498	-0.0426844	0.00170407	-0.0294387	0.0361537	0.00428995	0.00454878	-0.00512531
G0S2_MOUSE	0.10664	0.0246625	-0.0101985	0.0261404	-0.0208525	0.0382253	-0.135702	0.00132015	-0.0127158	-0.00575469	0.0271489
SWAHB_HUMAN	-0.00594366	0.0246469	-0.0451302	0.00270449	-0.000224937	0.00379982	-0.0558786	0.0110052	-0.0260311	-0.0427964	0.00200148
TOB1_HUMAN	0.00566998	0.0245908	-0.00883412	-0.0151806	0.0072452	-0.0383802	-0.0100704	0.00438963	0.00411403	0.00187911	-0.00138852
P15A_RABIT	-0.0202787	0.024463	-0.0382893	0.0421658	-0.0477485	0.0288837	-0.0455903	0.00551606	0.0567353	-0.0768325	-0.000953396
S22AN_HUMAN	-0.017472	0.0242024	-0.0239404	0.0383518	-0.00971858	0.00205801	-0.0319694	-0.00170457	0.0189287	0.0161107	0.00012426
IGSF6_HUMAN	-0.0128721	0.0241679	-0.0233126	0.065432	-0.0312158	0.0135484	-0.00541242	0.0269207	-0.0272772	-0.0306093	0.000861505
SRPR_BOVIN	-0.00485875	0.0238879	0.0558707	0.0412818	0.0289789	-0.00811045	-0.0135613	-0.0294034	-0.0254399	0.0314481	0.024182
X3CL1_HUMAN	-0.00381923	0.0238831	0.00965034	0.0198867	0.023557	0.00720261	-0.0279948	-0.0506739	0.00310017	0.0175392	-0.0047452
MMP25_HUMAN	-0.014535	0.0238743	-0.0195836	0.0323196	-0.023232	0.00171255	-0.00852566	0.0194167	0.00623513	-0.0177186	-0.00205521
MAF_HUMAN	-0.00299303	0.023705	-0.0529198	-0.0185789	0.00846098	0.0385289	-0.02625	0.00146613	0.000653543	-0.0310422	-0.0262864
BIRC2_HUMAN	-0.00484973	0.0235829	-0.026358	0.0329521	-0.00724334	-0.0293581	0.0172267	-0.00742917	0.0206589	0.00723639	-0.00678069
HXK2_HUMAN	-0.0109559	0.0235318	0.0271093	0.00255796	-0.0129911	-0.00100952	-0.014525	-0.0416274	-0.00736671	0.0229589	0.0076888
IL1B_HORSE	-0.02135	0.0234263	-0.0141373	0.037873	-0.000750473	0.00394513	0.00825193	-0.00742591	-0.00258626	0.0174651	0.000358018
FND3B_HUMAN	0.00107503	0.02337	-0.00650043	-0.00693946	0.0243628	0.0146571	0.0108777	-0.0250229	0.0246874	0.0483108	0.0104746
3BP5_HUMAN	-0.013603	0.0232707	-0.0339438	0.0645991	0.030554	0.0193704	-0.00102545	0.0138072	0.0184792	0.0385577	-0.410096
TGFA_PIG	-0.00722456	0.0232369	0.00360919	0.0092306	-0.0196672	0.0201477	0.0372333	0.0179888	-0.00582678	-0.0325136	0.00878637
AL5AP_HUMAN	-0.00835336	0.0228911	-0.0139597	0.0477914	-0.0729054	-0.00869931	-0.0455615	0.0498305	-0.0252102	0.00356155	-0.00824821
RGS18_HUMAN	-0.00561246	0.0228831	-0.00924302	0.0114952	-0.0219902	0.0228815	0.0164227	0.00551918	0.00536972	0.00665323	0.00178817
AIFM2_BOVIN	-0.00971318	0.0226626	0.00176258	-0.0524785	0.0146118	-0.0284538	-0.0028139	-0.0622397	-0.0350151	0.00120398	-0.0416622
PAI2_HUMAN	-0.0916459	0.022634	-0.0452307	-0.074445	-0.0895129	0.0197871	0.032892	0.0148916	-0.0787289	0.0188902	-0.0324083
TM41A_HUMAN	-0.00239504	0.0224727	0.0278095	0.000589093	0.0126928	0.00736328	-0.0172976	-0.00907335	0.00488002	0.00538129	-0.021103
PLAK_PIG	-0.00677801	0.0223996	0.0288518	0.0194722	-0.0187943	0.0128372	-0.0329691	-0.0104883	0.00924514	0.00931017	-0.0806676
LAT4_BOVIN	0.000693732	0.022057	0.0283837	-0.0213642	0.00577688	0.00481067	-0.0135559	-0.00412664	0.000934506	-0.0174072	0.0144467
PKP1_MOUSE	-0.0121479	0.0219896	0.00598349	0.0136129	-0.0712829	0.0405841	-0.0435885	-0.00401688	-0.00216718	-0.0171863	0.0773958
MMP15_HUMAN	-0.00460478	0.0219424	0.0272577	0.00656497	0.00964653	0.0322653	-0.00143145	-0.0108113	0.0191769	0.0126652	-0.0131854
RM09_HUMAN	-0.0393304	0.0218657	-0.128952	-0.0144652	0.0628699	-0.0165855	0.0475355	-0.0575155	0.0133088	0.0420021	-0.0297812
GNA15_RAT	-0.0037967	0.021768	-0.00968946	0.0118266	0.0161084	0.0385121	0.0561777	0.0295162	-0.0136072	0.0232413	0.0243854
PKHM2_HUMAN	-0.00288464	0.021754	-0.000910746	0.0223449	0.0101098	-0.00263378	0.0286428	-0.00781026	0.00913884	0.0111771	-0.00881133
DJC17_BOVIN	-0.0162554	0.0217034	-0.000911646	0.0303176	0.0102223	-0.000834249	-0.0314335	-0.0321967	0.0261791	-0.0345983	0.00642871
H2B1_PONAB	-0.00672636	0.0216031	0.0470908	0.0206339	0.0175909	-0.00409009	-0.0480261	-0.00295993	0.0332903	0.00459638	-0.041861
KREM1_HUMAN	0.00270507	0.0215007	0.0246622	-0.00946273	-0.0167652	0.0100082	0.00713626	-0.0180486	-0.0150222	-0.0052751	0.00177852
LIRA6_PANTR	-0.0132202	0.0211204	-0.0102795	0.0134355	-0.0136012	-0.00458745	0.0050103	0.0202334	0.000978231	-0.00153541	-0.00201276
MYL6_PONAB	-0.00916369	0.0209026	-0.00772138	-0.0646063	-0.0149877	-0.0346817	0.0631464	0.0368368	0.0269335	-0.0767207	0.0358834
SLAP1_HUMAN	-0.00811169	0.0209004	-0.0101716	0.00942752	-0.0222203	0.0275834	-0.0223702	0.0183929	-0.00228916	-0.0141333	0.00307993
ISK9_HUMAN	-0.0171781	0.0208015	-0.0318905	-0.0340372	-0.0805964	0.0730391	0.0120258	-0.0284472	0.0520336	0.0731348	-0.0333543
RCAN1_CRIGR	-0.0309028	0.0207742	0.0259458	-0.0309804	-0.00697483	-0.0646085	0.0304326	-0.0539388	0.0279853	0.0182891	0.0136129
RFIP5_HUMAN	-0.00994119	0.0205639	0.0185578	0.0499464	0.0358731	0.0185579	0.0288322	0.016833	-0.0327779	-0.0339067	-0.0295303
HAUS2_HUMAN	-0.00421613	0.0204798	0.0233233	0.0423647	0.00208161	-0.01689	0.012909	-0.0268231	-0.019198	0.0597127	0.0353991
ZC3H1_HUMAN	-0.0114863	0.0204029	0.00782853	0.0174235	0.00130552	0.00133899	-0.0231847	0.00654696	0.0195718	0.0117625	-0.0072146
CAN2_HUMAN	-0.00182197	0.0203191	0.00899636	0.0355533	-0.0152731	-0.0151974	-0.0126799	0.00353225	-0.0337969	0.000145275	-0.031526
TISD_HUMAN	0.00362183	0.0202863	0.0220993	-0.0158048	-0.00705644	0.0195695	-0.022019	0.0111651	0.0223649	-0.0173189	0.040932
EAA3_RABIT	-0.01977	0.02028	-0.0480744	-0.0244019	-0.048692	0.00593414	0.00834152	0.0120964	-0.0779527	0.0466088	0.0149662
CSRN2_HUMAN	-0.00504342	0.0202554	0.0192446	-0.0173972	-0.00990593	-0.00124948	0.00759377	-0.0142835	-0.00870665	-0.0208868	-0.00522701
CD53_HUMAN	-0.0160698	0.0200784	-0.000681495	0.0154933	-0.0239847	0.00608515	0.00169104	0.0178407	-0.0198156	-0.00632268	0.00359763
EGR3_HUMAN	-0.0243332	0.0200166	-0.0533296	-0.0264733	-0.00145579	-0.01222	-0.0554292	-0.00229647	0.00200151	0.0422686	0.0213256
BTG2_MOUSE	-0.0238509	0.0197759	0.000118814	-0.0307808	0.00491248	-0.00392789	-0.0327834	-0.0666169	-0.0279428	-0.00397057	0.000560596
NFAM1_HUMAN	-0.011173	0.0196481	-0.0181121	0.0385154	-0.019513	-0.0199673	-0.00114472	0.0358064	-0.0265349	-0.00228057	0.00171303
DHX16_PIG	-0.000636955	0.0196202	0.0355556	0.00403061	0.00429377	-0.012347	-0.0125546	0.000186357	0.013818	0.00151231	0.0244068
GAPR1_HUMAN	-0.0171397	0.019602	-0.0269448	0.0160138	-0.0131536	-0.0184674	-0.010128	0.0196038	-0.025404	-0.00727999	0.00573133
HCK_HUMAN	-0.0171968	0.0196004	-0.0166761	0.0283315	-0.0279232	-0.0222992	-0.0242815	0.0174222	0.00832983	-0.00804024	0.00104102
JUN_MOUSE	-0.0288168	0.0195381	-0.00366509	-0.0150667	-0.0102582	-0.0109911	0.00612898	-0.0127216	-0.0109093	0.00431348	0.025518
NRARP_MOUSE	-0.00288246	0.0193806	0.0562676	-0.0580879	-0.013046	-0.0166519	-0.0386087	0.025824	-0.0103	-0.0120148	0.00750445
FKBP9_BOVIN	-0.00986536	0.0192741	0.0132532	0.0247855	0.00873326	-0.00967381	-0.0235884	0.0116673	-0.0311004	0.015493	-0.0193477
SCNNB_MOUSE	-0.00182674	0.0191745	-0.0240693	0.0134668	0.0427017	0.0196612	0.0119882	0.00789878	0.0245328	-0.0194477	0.025768
ICAM1_CANFA	-0.0397869	0.0191128	0.0432531	0.0330751	-0.00920046	-0.0212693	-0.0166513	0.00782054	0.000368055	0.00316006	-0.015894
FA65B_BOVIN	-0.00948894	0.0190308	-0.00574777	0.0214666	-0.00520132	0.0052259	-0.00891201	-0.00597965	0.000941193	-0.00962707	0.0120766
PLAK_HUMAN	-0.00599467	0.018888	0.005091	0.0407189	-0.00259062	-0.00204906	-0.0265777	-0.00266033	0.0894984	0.0224326	-0.0438365
S15A4_BOVIN	-0.00341672	0.0188229	-0.0254033	0.0114453	0.0175302	0.00861201	0.0145433	0.00701872	0.0160805	-0.0354179	0.00790248
CD48_HUMAN	-0.0120502	0.0184934	-0.0308753	0.0056086	-0.00992595	-0.0371666	-0.00274047	0.0429582	-0.00375272	-0.00733334	0.00152905
AP1B1_HUMAN	-0.0116284	0.0184742	0.031424	0.00535759	0.0300636	-0.0170951	-0.0303787	-0.0202801	-0.0184864	-0.0134561	0.000617798
NR4A2_HUMAN	-0.00386711	0.0184675	0.0072596	-0.013966	-0.00155781	-0.00278813	-0.0199551	-0.00933082	0.00121711	-0.0315499	-3.71811e-05
JUND_BOVIN	0.0036372	0.0184395	-0.0306837	-0.0050749	0.00337302	0.00578496	0.0127327	0.01611	0.0419779	-0.00749984	0.040959
ACTB_RABIT	0.00100963	0.0183552	0.0216863	-0.023909	-0.01465	0.0141265	-0.00371137	-0.00656726	0.0315225	0.0387754	-0.0495042
TSP1_MOUSE	-0.0160277	0.018209	-0.034864	0.0432467	-0.00121585	0.0115462	0.00202501	0.00664722	-0.0506067	-0.00498318	-0.00717882
TMX4_HUMAN	0.00663399	0.0181739	0.00210633	0.0280611	-0.0141359	0.00566398	0.0128426	0.002779	-0.0100534	-0.0120268	0.0223776
PERT_PIG	-0.00146125	0.0180991	0.0303362	-0.0301105	0.00590948	0.0125228	0.0841459	0.0141232	-0.00378894	0.0352921	-0.0123908
P3C2B_HUMAN	-0.00386412	0.0180479	0.00848757	-0.015278	-0.0017547	0.0116837	-0.0302324	-0.00166643	0.0503175	0.00150074	0.00497886
CDA7L_HUMAN	-0.0093822	0.0179152	-0.0297665	0.0168465	-0.00457589	0.0417249	0.010297	-0.0202178	0.0316559	0.00832644	0.0321294
CAMP3_HUMAN	-0.0056569	0.0174658	-0.0179349	-0.00424294	0.011075	0.0265166	0.0292476	-0.0192617	0.0206215	-0.0124183	-0.00881322
ASPP2_HUMAN	0.00139124	0.0174454	0.00497131	-0.00536836	0.00922503	-0.0390082	-0.00776037	0.00742331	0.00608663	-0.0064325	0.00152059
MAF_BOVIN	-0.00340673	0.0174292	-0.0300849	0.00374595	0.0232813	0.0278368	-0.0255732	-0.0129729	0.0303098	-0.0266312	-0.0137647
FAK1_HUMAN	-0.0128321	0.0172607	-0.0183989	0.0153801	-0.0118729	0.00765801	-0.0240338	-0.0080305	0.00651085	-0.0276399	0.00399545
PADI4_HUMAN	-0.0206091	0.0172496	-0.0163206	0.0182873	-0.0183234	0.000700425	-0.0155214	0.0100395	0.00818315	-0.0242539	0.000494577
LIF_BOVIN	-0.0124698	0.0172136	-0.0286276	0.0192295	0.0158581	-0.00363537	0.010268	0.00485102	-0.0101398	-0.00231447	-0.00115891
EVI2B_HUMAN	-0.00721726	0.0172095	-0.00464309	0.0271425	-0.0153704	1.49971e-05	-0.00110244	0.017407	0.00275764	-0.00895766	-0.00458193
APLP2_HUMAN	-0.00363339	0.0171609	0.0206601	0.0146435	0.0243125	-0.0075274	-0.0396559	0.000235428	-0.00241765	-0.0134121	-0.00881189
EHD4_MOUSE	-0.00414276	0.0170915	0.0145255	0.00587287	-0.0433265	0.0134061	0.00640407	0.0119335	-0.00924825	-0.00176322	0.0242561
S22AF_HUMAN	-0.00680939	0.0170702	-0.00327045	-0.0106175	0.0196101	0.00658207	-0.0348578	-0.0351074	-0.0236403	-0.00854572	0.00353647
PURA2_PIG	-0.00438548	0.0169737	0.00963413	-0.000848481	0.0186178	-0.00223933	0.0188654	-0.0294755	0.0280485	0.00373659	-0.000206824
ASPP1_HUMAN	-0.0157153	0.016609	0.0150326	0.0149658	-0.00252983	0.00785017	0.00297532	0.024378	0.0435016	-0.0278689	0.0174113
WISP1_HUMAN	-0.00788858	0.0163625	-0.0306803	-0.00575864	-0.0347022	0.00735402	-0.0267537	0.0532271	0.0114119	0.0175035	0.00212138
KLH12_MOUSE	-0.0393618	0.0162962	0.0251944	0.0818066	0.0144306	0.0299782	-0.0242533	-0.032689	0.0200292	0.00270233	0.000125874
PVRL4_HUMAN	-0.0105454	0.0161853	-0.0449168	-0.0140137	0.000836965	0.0524187	-0.063315	-0.000854689	0.016033	-0.00580451	0.0132925
ARC_MOUSE	-0.00444659	0.0161625	0.0118004	-0.0101561	-0.00957672	0.0118253	-0.00261584	-0.00414525	0.0411923	-0.0285199	-0.00822853
CAN10_HUMAN	-0.0115143	0.0160986	-0.0205936	0.0157933	0.0110535	-0.00555064	0.0371876	-0.0070738	0.02636	0.0061057	0.0152038
GRK6_HUMAN	-0.00379352	0.0160354	-0.0228264	0.0109445	0.00983513	0.00747557	0.0152978	-0.000598592	-0.00345837	-0.0100748	-0.0337118
FAIM3_HUMAN	-0.0131737	0.0160201	-0.00159603	0.0350395	-0.0108015	0.00625638	-0.0148351	-0.00231596	0.00515819	-0.0197133	-0.00139662
WBS27_HUMAN	-0.0082804	0.0159451	-0.0127358	-0.0135306	-0.00271935	-0.00633455	-0.0326678	0.000679565	0.016187	0.00783059	-0.0011407
TT39C_HUMAN	-0.0103108	0.0158922	-0.0509448	0.00906596	0.0247687	0.0163871	0.0337891	0.0330785	0.00968993	-0.0541011	-0.00180956
CTNL1_PONAB	-0.0123958	0.015885	0.0186885	-0.00643583	0.00985079	0.0258043	0.0446418	0.00741945	0.0163354	0.0116813	-0.0195205
TRI17_BOVIN	0.0447051	0.0158814	-0.00396773	-0.00558488	-0.0311628	-0.00586849	-0.0295163	0.0247054	0.0101114	-0.0432026	0.00615389
FCERG_MACFA	-0.00440516	0.0158699	-0.032091	0.0373008	-0.0371506	-0.00236369	-0.0274206	0.0390402	-0.0290604	0.00456132	0.0110171
PAFA_CANFA	-0.00709633	0.015706	-0.0047969	0.0218868	-0.0246456	0.00648982	-0.0309812	0.014745	-0.0019704	0.00504272	-0.00157636
PLAK_BOVIN	-0.00365427	0.0156733	0.0208395	0.00654235	-0.0243009	0.0161037	-0.0131737	0.000717655	0.0122379	-0.00305315	0.0172797
TSN15_BOVIN	-0.0037577	0.015652	0.0158021	-0.0850064	-0.0521032	-0.016448	-0.00268705	0.0359619	0.0150094	-0.0959114	0.0375225
S10AC_BOVIN	-0.00913497	0.0156203	-0.0552801	-0.00133777	0.00492063	-0.00276518	-0.0122046	0.0167654	0.0131022	0.0344371	-0.000733306
PLSL_HUMAN	-0.0234806	0.015493	-0.0120944	0.032938	-0.0219977	-0.00271626	-0.00435677	0.0232015	0.00827152	-0.014447	0.00393055
MCEM1_HUMAN	-0.0141451	0.0154705	-0.0298186	0.0355901	-0.0353365	-0.0208144	0.000481724	0.00106374	0.0223621	-0.0024997	0.00250627
SUN2_MOUSE	5.67323e-05	0.0154109	0.00519106	0.0155308	0.00687071	0.00886676	-0.0083525	-0.00776298	-0.0220573	0.0116812	-0.0329346
DLX2_HUMAN	-0.0165899	0.0152894	-0.0427398	-0.0204451	-0.0143074	-0.0105581	-0.0383614	-0.0582514	0.0229589	-0.0309916	-0.00395109
HYCCI_HUMAN	-0.00118416	0.0152527	-0.0192481	-0.00579395	-0.0207129	-0.0473729	0.0299182	0.00416098	-0.00970699	-0.023645	-0.00847248
LPAR5_HUMAN	-0.00830345	0.0152523	0.0294174	-0.0108477	-0.0152802	3.67259e-05	0.0169543	0.0179741	-0.00885215	-0.0044722	-0.019521
F134A_HUMAN	0.00254667	0.0152214	0.0242777	-0.00480459	0.0359819	-0.0139062	0.0210731	0.00122616	0.00479747	0.0283038	0.0142562
UBP22_HUMAN	0.0014031	0.0151735	0.00568878	0.0128017	-0.0102961	-0.000530817	-0.00404311	-0.0089398	-0.00579294	-0.00465006	-0.0157975
LONF3_HUMAN	-0.00704668	0.0150823	0.0183877	-0.00280263	-0.0305323	-0.0180614	0.0314248	0.0294425	0.0334108	-0.0290272	-0.0060399
RAB1B_MOUSE	-0.0177926	0.0149044	0.0522291	-0.00189526	-0.0467187	0.0369576	-0.0403105	0.00210375	-0.0161365	0.0586029	0.00890071
PIMT_PIG	-0.00432993	0.0149043	-0.00655882	-0.0346208	-0.0425564	-0.0473121	0.0153763	-0.0382577	-0.00686343	0.0120934	-0.0213231
GNA11_BOVIN	0.00267315	0.0148772	0.000890248	-0.0196861	-0.00347118	0.0124321	0.00688259	0.00822398	0.0417177	-0.0244322	-0.0167398
NIPA3_HUMAN	-0.017991	0.0148705	-0.0145828	-0.0415	0.0214307	-0.014414	0.00469974	-0.00195574	-0.0186452	0.0297594	0.00998527
CXCR2_CANFA	-0.015946	0.0148542	-0.00570103	0.0180875	-0.012434	-0.000897066	-0.00649173	0.00997339	0.00455869	-0.0133749	0.0034147
DOK3_HUMAN	-0.00625236	0.0148403	-0.0193659	-0.00817273	-0.0397661	0.0180261	0.00158192	0.0276045	0.0151455	-0.0227274	-0.00033643
DCOR_BOVIN	-0.0143629	0.0148365	0.00113631	0.035044	0.0113313	-0.026206	0.013279	-0.0278169	0.0330099	0.00547189	0.00671846
MOT1_HUMAN	-0.0142982	0.0148323	0.0175786	0.0243442	-0.0350272	-0.0415394	0.0291648	-0.0139629	0.0367827	-0.0152715	0.00296025
OLFM4_HUMAN	-0.00614377	0.014801	-0.00449418	0.0238833	-0.0169842	0.00118856	-0.0083848	0.0156498	0.00490523	-0.0184553	0.0181813
MOCOS_MOUSE	-0.00216743	0.0146812	0.0104034	0.00105831	0.00123866	-0.0216713	-0.0505669	-0.0124735	0.00930936	-0.0363971	-0.00246749
ATX10_BOVIN	-0.00256358	0.0146271	0.0273281	-0.0295778	0.0251665	-0.00275936	0.0225484	0.0441587	-0.00752239	-0.0106166	-0.0112023
ARL5B_MOUSE	0.0100236	0.0145705	0.00745925	-0.0054178	-0.015049	-0.0450283	-0.0197266	-0.00997	-0.000969714	0.0352581	0.00632677
BCR_HUMAN	-0.00184344	0.0145603	0.00712871	0.0119956	0.0276473	-0.0151379	0.0096448	-0.0192125	0.00802355	-0.0218617	-0.0132595
FPRP_HUMAN	-0.00264356	0.0145419	-0.00186091	0.0550775	0.00817961	0.0452469	0.0185469	-0.0184112	-0.000705346	0.0209195	-0.0246905
ISK5_HUMAN	-0.0241464	0.0144378	-0.00849919	-0.0144118	-0.0063108	-0.0863316	-0.0610484	0.0291039	-0.0250723	0.0708816	0.0322526
LOX5_HUMAN	-0.00876682	0.0144245	-0.0127565	0.0503073	-0.0281396	-0.0043606	-0.0153492	0.0210603	-0.0265228	-0.0215528	0.00506011
ZSWM4_MOUSE	0.00335962	0.0144027	0.00238408	0.00276502	0.0187368	-0.00331079	0.00388791	-0.0261453	0.0330775	-0.0283177	-0.00282173
ABR_MOUSE	-0.0176038	0.0143745	0.0265846	-0.0126876	-0.02105	0.00931424	0.00713044	-0.018865	-0.00438243	-0.00527291	-0.00255186
F263_RAT	0.00142276	0.0143442	0.0336194	-0.0110015	-0.0108813	-0.00272457	0.0100256	-0.0319562	0.00870707	0.0189468	0.016194
PPIF_MOUSE	-0.0107797	0.0143167	0.000624474	-0.018113	-0.00768202	-0.000334789	-0.0224504	0.00220938	-0.00793376	0.0179314	0.000546301
MALD3_HUMAN	0.00187069	0.0142337	0.0156451	-0.0120026	-0.0174288	-0.025649	0.058564	0.00756988	-0.0071037	0.0262769	0.0171214
F110A_BOVIN	-0.000401302	0.0142096	-0.0193168	0.0130551	0.00508286	0.00562841	0.00973365	0.0412159	-0.00557056	0.000190792	-0.0175346
SSBP2_MOUSE	-0.0085331	0.0142094	0.00234925	-0.00608222	0.0134311	0.00290113	-0.00213613	-0.0246667	-0.00547542	0.0058412	-0.00300015
STX3_HUMAN	-0.0110096	0.0141198	0.0118072	0.0442847	0.0187362	-0.0308755	0.0229687	0.010509	-0.0135394	0.0210247	0.000583945
FXL12_HUMAN	0.00141954	0.0140678	0.0361153	-0.0650298	-0.0319545	-0.0227796	0.00824604	0.0172886	-0.0335076	-0.0173146	0.00540439
TFR1_FELCA	-0.0190083	0.0140677	0.0520174	-0.0128897	-0.00618353	-0.0320562	0.00948059	0.00779906	0.000170492	0.0225085	0.000239058
RRP1B_HUMAN	-0.00501328	0.0140336	0.0193319	0.0274066	-0.0114442	0.0236876	-0.00396758	-0.00734116	-0.00532805	0.0238366	-0.01171
CD97_HUMAN	-0.0142356	0.0138772	-0.00387498	0.0378028	-0.0204101	0.00313286	-0.00798052	-0.0033691	-0.00221629	-0.0636216	0.0127897
HDAC5_CRIGR	-0.000169702	0.0138638	0.00798299	-0.0194938	-0.0205877	-0.0044746	-0.0038304	-0.0180029	0.0127966	-0.00452263	-0.0154742
GLRX1_PIG	-0.00419517	0.0138544	0.0270565	-0.0156889	-0.0366203	-0.0646362	0.0416301	0.0232914	0.0770911	0.0300794	0.0136282
LAPM5_PONAB	-0.00249899	0.0138393	-0.00758904	0.0368098	-0.0457098	-0.0083234	-0.0108821	0.0188459	-0.0148154	0.00418771	0.00514839
PERM1_HUMAN	-0.00547093	0.0138351	0.00597198	0.00287369	-0.0120826	-0.0403986	-0.0232004	-0.0318879	0.0253684	-0.0559291	-0.00208237
F264_MACFA	4.16717e-05	0.0138205	0.00680401	0.00208564	-0.00958749	-0.00913062	-0.0271683	0.000222905	0.0335754	0.0265542	-0.00260705
FBW1B_HUMAN	0.00345026	0.0138095	0.00687984	0.017098	-0.0111352	-0.0255897	-0.0256299	0.0368492	0.012149	-0.0298842	0.0236873
CP4FN_HUMAN	-0.00712355	0.013773	0.011245	-0.0348368	-0.0223412	0.019198	-0.0186898	0.016465	0.0548436	-0.00382583	-0.0201798
SPRR1_PIG	-0.0804595	0.0137447	-0.0964089	-0.043085	-0.0376146	-0.0133452	-0.0351619	0.0198924	0.0262964	-0.0429771	0.0210725
PURA2_HUMAN	-0.00875134	0.0137021	0.0329569	-0.0147875	0.0175977	-0.0197286	-0.000913997	0.009807	-0.000114142	0.0241237	-0.0219585
FZD8_RAT	-0.00062176	0.0134896	-0.0014465	-0.0255779	-0.0313625	0.0210209	-0.0138877	0.0157072	-0.0155712	-0.00105016	-0.00247191
CQ10B_HUMAN	-0.00591611	0.0134539	0.00650326	-0.0505985	-0.023762	-0.0230477	0.00280426	0.0086526	-0.0070269	0.0297664	0.0472537
AF10_HUMAN	-0.0113018	0.0133011	0.00561913	0.00204451	-0.0284491	0.00282961	-0.00415651	-0.0161398	0.0118183	0.0254939	-0.00266559
ZN362_HUMAN	-0.00144713	0.0132684	-0.00758538	0.00941696	0.017543	0.0246432	0.0132781	-0.00813068	0.00141	-0.0133081	-0.00380617
NR4A3_HUMAN	-0.00581891	0.0132548	0.0202067	-0.00825295	-0.0172606	-0.0162564	-0.0177525	0.00310581	-0.0217525	-0.00167431	0.00193675
CRIM1_MOUSE	-0.000777182	0.0132246	0.000157826	0.00968453	0.00868391	0.0126068	-0.0102218	0.00451798	0.0231832	-0.00632722	0.0191276
NFE2_HUMAN	-0.0125472	0.0131967	-0.0189606	0.00168589	-0.0227791	-0.00273431	-0.0152971	0.021678	0.00891902	-0.0290011	0.00771251
RN125_HUMAN	-0.0197121	0.0131572	-0.0335307	0.00322525	0.0371461	0.0225922	0.0491865	0.0205783	-0.0272142	0.0691705	0.0173651
RGS2_BOVIN	-0.0108954	0.0131425	-0.020092	0.0112739	-0.0144362	0.0243637	0.0114549	0.0003218	-0.0102211	-0.0168552	0.00985526
PRDM1_HUMAN	-0.0144593	0.0131415	-0.0427035	0.0110533	-0.0140615	-0.0255477	0.0102335	-0.0189198	0.0236738	-0.0263806	0.0124349
PDLI5_MOUSE	-0.0172074	0.0131084	-0.0122872	-0.0375659	-0.0359499	-0.0674778	-0.00741318	-0.00759141	0.021028	0.0333043	0.00984908
EGR2_PIG	-0.0164134	0.0131013	0.00109005	-0.0208252	-0.00274222	-0.011207	-0.00538805	0.00433074	0.00176763	-0.0154904	-0.00766133
K1C17_RAT	-0.022642	0.0130846	-0.0114049	0.0138917	0.0380315	0.00586966	0.0208498	-0.0875618	0.00462983	0.00258567	0.00141067
MCTP2_HUMAN	0.00214331	0.0130535	-0.030963	-0.00266711	0.0167066	-0.0224013	-0.0225121	-0.0140643	0.0457065	-0.0122425	0.0124754
GRP2_HUMAN	-0.00640077	0.0130236	-0.00735151	9.64213e-05	-0.0036489	0.011388	-0.00743247	0.0209233	0.0157728	0.00415337	-0.00646121
PTPRC_HUMAN	-0.0111552	0.0129896	-0.000364812	0.0338349	-0.0123528	0.00339425	-0.00852618	0.00626283	0.00479187	-0.0146532	0.00624618
SAMN1_HUMAN	-0.0102708	0.01295	-0.00785956	-0.00226496	0.000409845	-0.0027172	0.00579124	0.000896546	-0.0024187	0.00796647	0.000879042
NUCL_HUMAN	-0.00441161	0.0128198	0.0501663	0.0164693	-0.0194703	-0.00706407	-0.0216039	-0.0130737	-0.00958712	0.050652	-0.00490425
IPIL2_HUMAN	0.000661474	0.0127311	-0.0139899	-0.00415006	-0.00482838	-0.00511045	-0.0166216	-0.0217679	-0.0143654	0.000887504	0.000828688
PHAR1_CHICK	-0.00879703	0.0127098	0.00775922	0.019176	-0.0142576	0.00802265	0.00946691	0.00888731	-0.0235572	0.00804085	-0.00328803
SELPL_HUMAN	-0.00862206	0.0126604	-0.00389045	0.0190093	-0.0322655	0.00627445	0.0224265	0.0055228	-0.00499916	-0.0089493	0.00175804
JMJD6_PONAB	0.00547218	0.0125222	0.0226877	-0.0175287	-0.0265863	0.00209144	0.0200449	0.0347916	0.00352762	-0.0377419	0.0303661
HES1_BOVIN	0.00259452	0.012468	-0.0334536	0.00238513	-0.0158954	0.024069	0.0146371	-0.0062816	0.0204021	-0.0103732	-0.0169247
CASL_HUMAN	-0.0107988	0.0123549	0.005148	0.0298197	-0.00502427	0.015436	-0.0183843	-0.027709	-0.0137235	-0.0169218	-0.00307696
AKT2_HUMAN	-0.00780188	0.0121631	0.0120943	0.00715035	0.0146143	-0.00552795	0.00813323	-0.0218278	0.0110702	0.0194881	-0.0174707
PPIF_RAT	-0.0261401	0.0121521	-0.00779224	-0.082744	-0.0608183	0.0239695	0.00558463	-0.0365868	-0.055462	0.0119938	-0.0218353
CYTF_HUMAN	-0.0113575	0.0121052	-0.0186533	0.00447951	-0.0289297	-0.00586196	-0.0110315	0.0355078	0.0101189	-0.0290691	-0.002256
SBSPO_BOVIN	-0.0104403	0.0119942	0.0110857	0.0240513	0.0159119	-0.00308171	-0.00120845	0.00373303	0.0303111	0.00810919	0.00083949
KCNK5_HUMAN	-0.00691212	0.0118978	-0.0317266	-0.0308752	0.00377858	0.0151554	-0.0405571	0.0167761	-0.00790923	-0.066865	-0.0156536
IL23A_HORSE	-0.0395852	0.0118222	-0.0745122	-0.0257196	-0.016353	0.0269394	-0.0520651	-0.051402	-0.0103372	-0.0367278	0.00921939
YK006_HUMAN	-0.0242071	0.011771	0.0524338	-0.0323665	-0.0351656	-0.0394917	-0.00964168	-0.0393465	-0.0377066	0.032052	0.0178258
GSDMC_RAT	-0.011931	0.0117651	0.0451202	-0.0425342	-0.00776389	-0.0227032	0.0228389	0.00884742	0.0141354	-0.0278928	0.00185394
K2C1B_HUMAN	-0.00467773	0.0116676	0.00560131	-0.0178678	-0.0132651	-0.00145702	0.00880226	-0.0543756	0.00693904	0.0396486	-0.0419342
ZN534_HUMAN	-0.00165136	0.0116467	-0.028555	-0.0123272	0.0143353	-0.0301708	0.0173054	-0.019324	-0.0128569	0.0160218	0.0179857
CLC4E_RAT	-0.0247387	0.0116424	0.00264562	0.0166201	-0.0135601	-0.0111737	0.0110262	0.0286939	0.00374323	0.00121179	0.000742608
CLC4D_HUMAN	-0.00563881	0.0115878	0.0027945	0.00101542	-0.00361366	-0.0012254	-0.00421068	0.00287423	0.00037839	-0.0091195	0.0029057
FGD3_HUMAN	-0.00563881	0.0115878	0.0027945	0.00101542	-0.00361366	-0.0012254	-0.00421068	0.00287423	0.00037839	-0.0091195	0.0029057
PHLA1_HUMAN	-0.0199506	0.0114796	-0.0281951	-0.0214943	-0.0226646	0.00639258	0.00917404	-0.0138911	-0.0160589	-0.00646572	0.0126666
TMPSD_MOUSE	-0.00529182	0.0113621	-0.007154	-0.0423879	0.00433835	0.0224746	-0.0464975	-0.0412869	0.013246	0.0144904	-0.0109076
ITB2_PIG	-0.0145884	0.0113366	-0.012011	0.0269928	-0.013543	0.00435862	-0.0135994	0.00269006	0.00679246	-0.0179278	0.00162574
HMR1_RAT	-0.00587432	0.0112379	-0.0566024	0.0126361	0.0153075	0.00325259	0.00486072	0.0745989	-0.0226408	-0.0473598	-0.00377873
LPAR1_SHEEP	-0.00241967	0.0110508	0.00215094	-0.00392701	-0.0319675	0.0472803	0.0185715	-0.00459402	0.0320196	-0.00588838	-0.00249183
CLC6A_BOVIN	-0.00548778	0.0110391	0.00362546	-0.000528909	0.0022093	-0.00290077	0.00645264	0.0014018	-0.00331603	0.00651575	-0.00824257
ABC3G_SAGLB	-0.0395067	0.0109991	-0.0220148	0.106347	-0.05791	-0.00617105	0.0309309	0.048066	0.0341157	-0.0132658	0.00756851
ELL2_HUMAN	0.00234705	0.0109947	0.00831765	-0.0315946	-0.0077534	-0.0213295	-0.00199883	-0.0128457	-0.0152129	-0.000387725	0.0201719
DIAP1_HUMAN	0.00129263	0.0109217	0.0229834	0.0317578	0.0569316	-0.0143535	-0.0120351	-0.00649228	0.00827846	0.00260098	0.0298949
CLC5A_PIG	-0.00783417	0.0108666	-0.00655863	0.0156483	0.0170898	0.00814082	-0.00400283	0.0211938	0.0078524	-0.00972335	-0.00133699
IP6K2_RABIT	0.074839	0.0108331	-0.0227796	0.00118483	-0.0149362	0.00513001	-0.0283721	-0.0530222	0.0301464	-0.0252498	0.0211042
EHF_BOVIN	-0.00779069	0.0108112	-0.0559502	-0.0401937	0.0288424	0.0488783	0.0203113	-0.013051	-0.0106286	-0.0302891	-0.0431577
FS2P1_MOUSE	-0.0268131	0.0107929	0.000554428	0.023811	-0.0158244	-0.0489184	0.0186646	0.0121954	-0.0169684	0.0698945	0.0399905
NOP14_HUMAN	-0.0142087	0.0107801	-0.0345911	0.0118549	-0.0281822	0.000911858	-0.0188642	0.0216161	0.0120013	-0.0298969	-0.00117182
FOSL1_HUMAN	-0.0238682	0.0107502	-0.050509	-0.0587452	-0.0103294	-0.0555736	0.0498831	0.0431707	-0.00972581	-0.0604187	-0.00740547
SC5D_MOUSE	-0.00459302	0.0106521	0.0185529	-0.0426829	-0.012535	0.00840627	0.00228266	0.0264013	0.0205094	-0.013159	-0.00837212
HA19_CANFA	-0.0315788	0.0105171	-0.00846008	-0.030548	-0.0544429	-0.0410123	0.0441282	0.0915656	0.0270272	-0.021756	-0.00618402
SNTB1_HUMAN	0.000437869	0.0104823	0.0151712	-3.2376e-05	0.0219145	-0.00458764	-0.00299502	-0.00864102	-0.0187686	0.0184611	-0.00193531
ZFY27_PONAB	-0.00136921	0.0103466	0.00219642	0.0193247	0.02734	-0.0122106	-0.00317019	-0.02545	-0.00612642	-0.0322854	0.015415
PPGB_BOVIN	0.0351454	0.0103017	-0.000729857	0.018278	0.0111549	-0.0257746	-0.0183241	-0.000798994	-0.00316805	0.0219237	-0.00168286
SCNND_HUMAN	-0.014481	0.0102334	-0.0169212	0.0235501	-0.00701094	-0.0284048	-0.0150541	-0.0410399	0.0168016	-0.0131823	0.0220516
DPYL1_RAT	-0.00935319	0.0101998	0.0462262	0.00752742	0.00264412	-0.0034457	0.0355905	0.00491471	0.0355532	0.0137297	-0.0108908
OLR1_RABIT	-0.00963151	0.0101664	0.0159381	0.0158879	0.0606855	0.00760367	0.0161886	-0.0199508	-0.00413955	0.0301048	-0.0218279
HIDE1_HUMAN	-0.00505002	0.0101531	-0.00307438	0.0116739	-0.00333978	0.00276042	-0.00515447	-0.00254255	0.000750364	-0.00597615	-0.00940634
LITD1_MOUSE	0.0762137	0.0100785	-0.0277151	0.0423481	0.0233265	-0.102181	-0.0389209	-0.0700359	-0.069893	-0.000879675	-0.0107448
LTBP2_HUMAN	-0.0055361	0.00998807	0.00251572	-0.00490608	-0.00116493	0.00227776	-0.0157048	-0.00898487	0.00199157	-0.0201336	-0.00364913
RBPJL_HUMAN	-0.0055361	0.00998807	0.00251572	-0.00490608	-0.00116493	0.00227776	-0.0157048	-0.00898487	0.00199157	-0.0201336	-0.00364913
MATN4_HUMAN	-0.00613177	0.00997534	-0.00178259	-8.47513e-05	0.00296167	0.00373013	0.018783	-0.0153879	-0.0165382	-0.0235713	-0.000921905
CYTB_BOVIN	-0.00938666	0.00981962	-0.0154847	0.0197383	-0.0221596	-0.0103983	0.0153657	0.0506065	0.0158058	0.00415718	-0.0304703
RHG30_HUMAN	-0.00370321	0.00981918	-0.0227207	0.0144055	-0.014877	0.000211018	-0.0104414	0.00676283	0.0054465	-0.016469	-0.00319184
GPNMB_HUMAN	0.00443039	0.00978402	0.0168268	-0.0235114	0.00832927	0.00467822	-0.0580372	0.0303608	-0.0258649	0.00168933	-0.000551727
MC4R_PIG	-0.0183129	0.0097308	0.00110452	0.0215922	0.00639993	-0.00684003	0.0306359	0.00672858	-0.0066051	0.0400465	-0.00276144
VKGC_BOVIN	-0.0054612	0.00965403	0.00323784	-0.00560862	0.0048832	0.000323166	-0.00330272	-0.00975802	-0.00211915	-0.00229233	-0.000568358
SPT2_HUMAN	-0.00782589	0.00962493	0.0307051	-0.0262394	-0.024603	-0.00160163	-0.00212217	0.00364903	-0.00965151	0.00227688	-0.00762134
IL19_HUMAN	-0.00489632	0.00960049	-0.00221239	0.0100676	0.00248203	0.00106326	0.00551543	-0.0039834	-0.00294497	0.00964438	0.0185246
GNDS_HUMAN	-0.00801763	0.00959988	0.019039	0.0308722	-0.00787167	0.0219444	-0.00994659	-0.0260761	-0.0126985	-0.049706	-0.0371814
T4S1_HUMAN	-0.0131892	0.00959107	0.0111777	-0.0346803	-0.0181065	0.0255333	-0.00836369	0.0267747	0.0421913	0.0476257	-0.035599
SEC63_MOUSE	0.000257099	0.00940006	-0.00598527	-0.0176269	0.00108985	-1.78048e-05	0.00298286	-0.0023776	0.0212334	0.051536	0.0310401
TRYB2_MOUSE	-0.00381489	0.00934235	0.00885256	-0.00941357	-0.0110509	-0.00615779	-0.00790095	0.0177988	0.00348763	-0.0228457	0.0237961
ASF1B_HUMAN	-0.0109807	0.00930537	0.0205991	-0.0177799	-0.023254	-0.0159151	0.0166346	0.0261654	0.00577813	0.0207138	-0.0112968
GNA12_MOUSE	-0.00124685	0.00930374	0.000828965	-0.00238074	0.0226509	0.0222143	0.0320358	-0.0481833	0.036977	0.0102956	0.013933
PTC2_HUMAN	-0.00405787	0.00929253	0.00416645	-7.56096e-06	-0.0153495	0.0154087	0.0297391	0.0124676	0.00334605	0.0204498	-0.00115018
MGT5B_MOUSE	0.0398041	0.00926607	-0.0315255	0.0120763	-0.0220262	0.0130067	0.0122095	0.00109501	0.0158491	-0.0545301	0.00147666
ENTP3_HUMAN	0.0113968	0.00926408	-0.0333039	-0.0768124	0.0895004	0.00294575	-0.0593193	0.0472279	0.0395088	-0.00374358	0.0032948
ADA19_HUMAN	-0.00384389	0.00913629	-0.00249533	0.0144369	-0.00844147	6.49622e-05	-0.0012447	0.00926758	0.00166391	-0.00564039	-0.0152031
CB072_HUMAN	-0.00384389	0.00913629	-0.00249533	0.0144369	-0.00844147	6.49622e-05	-0.0012447	0.00926758	0.00166391	-0.00564039	-0.0152031
ARL8B_MACFA	-0.0150931	0.00913517	0.0204992	0.00237623	-0.0166832	-0.0287719	0.0160934	-0.0253812	0.0259453	-0.00908471	-0.0021703
RS29_ICTPU	0.0584195	0.00904733	-0.0122742	0.0443205	-0.0333373	-0.0841976	0.0615532	-0.0615087	-0.0144915	-0.0543839	-0.0045741
RHG42_HUMAN	-0.00268464	0.0090323	-0.0171299	-0.00691549	-0.0101816	0.0544825	0.0572334	-0.0481294	-0.0237985	0.022528	0.00078004
GOLI_HUMAN	0.00354065	0.00894404	-0.0383957	-0.00646864	-0.00520636	0.0151311	0.0161572	-0.0295903	0.0128892	0.00611219	-0.00903777
CAN2_BOVIN	-0.00184465	0.00892209	-0.00366653	0.0066645	-0.0328622	-0.0025162	-0.00677379	0.00651981	-0.0464004	-0.00246799	0.0275592
EI24_HUMAN	-0.0049612	0.0088612	0.0266261	0.00328327	-0.0142352	0.0174895	-0.00466848	0.00323499	-0.0232013	0.0279467	-0.0320539
F263_PONAB	-0.00136736	0.00881802	0.0309702	-0.0281317	-0.0234751	0.0366875	0.0297399	-0.00425744	-0.0149369	-0.0140043	0.00964618
PTHY_HORSE	-0.00437039	0.00879682	0.00244522	-0.0389493	-0.00964192	0.00469448	-0.00194965	-0.0461862	0.00388382	-0.0394334	0.00994324
BLNK_HUMAN	-0.011029	0.00869788	-0.0432508	0.0359838	0.00999151	-0.021049	-0.0105765	0.006166	0.0988449	-0.0484606	-0.0126442
EMP1_MOUSE	-0.0119306	0.00868473	0.0277188	0.0347854	0.0182383	0.0583194	-0.0349407	0.0127319	0.0344952	0.0456157	0.0815157
ANKH_HUMAN	0.000311312	0.00867987	0.0267434	0.0305976	-0.0274465	-0.00850933	0.0106906	0.0156489	0.00734468	-0.0332786	-0.00122842
BI1_BOVIN	0.00424337	0.00867917	0.0177612	0.00536767	-0.00474697	0.00458598	-0.0055139	0.00539737	-0.00373322	0.0103326	-0.032275
CE030_BOVIN	0.0538398	0.00865709	-0.0198027	-0.00308392	-0.0143147	0.0272109	-0.0169809	0.00213597	0.000242924	-0.0343862	0.0231374
BPI_BOVIN	-0.000439548	0.00863194	0.00380373	0.000598049	-0.00364412	-0.00712482	-0.018968	0.0314935	-0.0113082	-0.00884829	-0.00131984
GPR34_PANTR	-0.00438587	0.00858288	0.00371546	-0.00356209	0.000833695	-0.00181122	-8.35987e-05	-0.000269505	-0.00137259	-0.00192861	-0.00371659
ZMYM4_HUMAN	-0.00438587	0.00858288	0.00371546	-0.00356209	0.000833695	-0.00181122	-8.35987e-05	-0.000269505	-0.00137259	-0.00192861	-0.00371659
BIN2_HUMAN	-0.0177494	0.0085816	-0.0273144	0.0126296	-0.0417159	0.00597417	-0.00760454	0.0351159	-0.0111276	-0.0206405	0.00199287
F220A_HUMAN	0.0670257	0.00845721	0.0149729	0.00577514	-0.0256452	0.130564	-0.117042	0.0886925	-0.0301128	0.147698	0.0122398
B3GN5_PIG	-0.00819746	0.0084437	-0.0074312	-0.00805196	-0.00214095	-0.000714284	-0.00650943	-0.00222909	0.00120419	-0.00800803	-0.00369307
TRPM2_HUMAN	-0.00769103	0.00841866	-0.0131829	0.00792138	-0.00471319	1.52576e-05	0.00245087	0.00379738	0.000409369	0.00409081	-0.00792105
DNJA1_HUMAN	-0.00317153	0.00840544	0.0297307	-0.036996	-0.0253994	-0.0474254	0.00148431	-0.00312524	0.0168989	-0.00714748	0.0427474
ODPA_HUMAN	-0.00151915	0.00833734	-0.000116807	-0.0120327	-0.00161691	-0.0116548	-0.0232734	0.00867779	0.00708912	0.0359072	0.0120989
URFB1_HUMAN	0.00158043	0.00831159	0.0176277	-0.0167616	-0.0222767	-0.00334625	0.0010209	0.00840793	-0.0083587	0.00132836	0.0121847
LIMA1_HUMAN	-0.0105657	0.00829833	-0.021863	0.0147651	0.0169888	0.000926801	0.00115066	0.00655087	-0.0166731	0.0101987	-0.00473908
OSBL1_HUMAN	0.00357012	0.00819599	0.0315264	-0.0162311	-0.0109582	-0.026257	-0.0134618	-0.016846	0.00745693	-0.00332345	-0.00408905
ABC3G_LAGLA	-0.0528224	0.00818649	0.0438001	0.0817465	-0.0463965	-0.0398103	-0.0662655	0.0248157	0.0650307	-0.0243266	0.00755029
PKHA6_HUMAN	-0.00986209	0.00817528	-0.00658819	0.0130704	0.0152557	-0.00712758	0.00633254	0.0101469	-0.00756375	-0.0137435	0.00169893
TRAK1_HUMAN	0.00314426	0.00813435	-0.00702479	-0.0373764	-0.00462076	0.0385362	0.028188	0.00999478	0.00609948	-0.0348222	0.00062495
FGR_HUMAN	0.000194334	0.00813026	-0.00685043	0.0217484	-0.0203829	-0.0164823	0.000830755	0.00506274	-0.00999894	-0.0268117	0.00200501
DIRC2_HUMAN	-0.00961368	0.00808987	-0.00140761	0.0109297	0.0510038	-0.0114656	0.0344583	-0.0117804	-0.00522712	0.012883	-0.044276
CSCL2_HUMAN	4.90136e-05	0.00806431	0.0141812	0.0199324	0.0250318	0.0123455	0.00508072	-0.0217722	0.00944769	0.00960503	0.0141968
TBB4B_MESAU	-0.00332612	0.00804012	0.0240986	-0.0120111	-0.00886064	-0.0142459	-0.00424841	0.0102376	-0.0039957	-0.0178392	0.0676075
AP2A2_MOUSE	-0.00115285	0.00795504	0.033757	-0.00207124	-0.0140384	0.0140204	0.00347976	-0.0151471	-0.0134141	-0.0297633	-0.0134609
CHKA_HUMAN	-0.019954	0.00794738	-0.015511	-0.0333798	-0.0134213	-0.0040813	-0.0110535	0.0455205	-0.0289995	-0.0350921	-0.00579534
NPTX1_MOUSE	-0.00973602	0.00791681	0.00138441	-0.039982	0.0103737	-0.0010827	-0.0178507	-0.023139	-0.000521497	-0.0182035	-0.00505596
NGF_BOVIN	-0.0125468	0.00787997	-0.0114659	0.0262513	-0.0197724	0.00316648	-0.017406	0.0114924	0.00983231	-0.0271592	0.00762958
GOGA1_MOUSE	-0.00566028	0.0078603	-0.00290864	-0.00769804	0.0391666	0.00109339	-0.0206923	0.00512023	0.0140216	0.0050849	0.00642175
S20A1_FELCA	-0.0202137	0.00777063	-0.00288689	-0.0133151	-0.0135789	-0.0115863	0.00964869	-0.00570256	-0.032806	-0.00521912	-0.0221788
PHF2_MOUSE	-0.00308699	0.00774343	0.0144643	0.0317929	0.0322444	0.018624	-0.0122586	-0.000738773	0.0153279	-0.0028793	-0.00416529
SAM9L_HUMAN	-0.0117522	0.00774117	-0.0238156	-0.00321633	-0.0226686	-0.00885364	0.00254094	0.03547	0.00650824	-0.00857275	0.00179452
CP24A_HUMAN	-0.0161715	0.00762897	-0.00535163	0.00957137	-0.0190583	-0.0218894	-0.0312359	0.0050071	0.00921331	-0.015626	0.00223325
SYNE2_HUMAN	0.00138785	0.00762599	-0.0288094	-0.00367342	0.0181409	-0.0228015	-0.00861205	-0.00292206	-0.000133682	0.0352299	0.0105872
FOXO6_MOUSE	-0.0127598	0.00757871	-0.00656162	0.0121022	0.0120371	0.0042312	0.00502664	-0.00966123	0.0160919	-0.013554	0.009385
5HT1D_RAT	-0.00318897	0.00750297	0.00437206	-0.00118089	-0.00401037	-0.00442023	0.00378431	0.0111186	-0.000510546	-0.00153529	0.15254
NCF1_BOVIN	-0.0126297	0.00739618	-0.0102728	0.0200401	-0.00742096	0.00339297	-0.00789305	-0.00133164	0.00429513	-0.00826845	-6.78877e-05
PCYOX_MACFA	-0.0113561	0.00738315	0.00038976	-0.0107545	-0.00121983	0.0324427	-0.0231996	-0.024611	-0.0283985	0.0264673	-0.00543733
RL7A_PIG	0.0574889	0.00722325	-0.00251532	0.0665018	0.056326	-0.0246871	0.00303413	0.0105167	-0.000822072	-0.00869291	-0.0211697
TIP_HUMAN	-0.000205453	0.00720541	-0.000797717	-0.019133	-0.00796192	0.0442577	0.0400168	-0.00310977	0.0247083	-0.0223894	0.0336946
MOT6_HUMAN	-0.00728944	0.00713922	-0.0398332	-0.00960827	-0.0341023	0.0293674	-0.0465574	-0.0244499	0.0132231	-0.0156225	-0.0196876
S11IP_HUMAN	-0.00950119	0.00695228	0.0300296	-0.0190033	-0.0227909	-0.0122479	-0.0207641	-0.0264924	0.0121781	0.0183724	0.00465063
MAFK_HUMAN	-0.00616407	0.00693441	0.00281839	-0.0151622	0.0312093	-0.0135979	0.0196856	0.0181628	0.00539355	-0.0299286	-0.0097464
IRG1_HUMAN	-0.00698767	0.00691396	-0.00603378	-0.00751476	-0.000427361	-0.00457813	0.00742811	0.00594786	-0.00175018	0.00796683	0.0034464
TTL_HUMAN	-0.000672317	0.0068939	-0.00350996	-0.0367863	-0.0381732	0.00853878	0.0105236	-0.00962303	0.00902795	0.0135696	-0.0196271
CLCF1_HUMAN	-0.0052744	0.00685329	0.00419526	0.00458011	0.0189295	0.0128934	-0.0117639	-0.0250443	-0.0311872	-0.0256759	-0.00152212
F177A_MOUSE	-0.00110398	0.00670787	0.0163437	-0.0188069	-0.0196609	0.00581559	0.00985992	-0.0115531	0.0229062	0.0427538	0.0406988
GLNA_CRIGR	0.0619022	0.0066685	0.00314084	-0.0193723	0.0133318	0.0120422	0.0125262	-0.0347077	-0.0440064	0.0207672	-0.0209446
ZSWM4_HUMAN	0.00383173	0.00666562	0.000350113	-0.00896637	-0.0137889	0.0270427	0.00659054	-0.0179982	-0.00337374	-0.00168941	0.0192618
RBM47_MOUSE	-0.00228398	0.00652173	0.00418014	-0.00817401	0.0183236	-0.0173507	-0.016109	0.01827	0.00617011	0.00121978	-0.000457364
KIBRA_HUMAN	-0.00781136	0.00651819	0.0193952	0.02767	0.0180751	4.19462e-05	0.0210174	-0.0211184	0.00353678	-0.0282002	-0.00429138
GALT4_MOUSE	-0.00204794	0.00647211	-0.00410267	0.00827565	-0.00323841	-0.0272779	-0.0132768	0.00341294	-0.0204393	0.00286479	-0.00841006
FFAR2_HUMAN	-0.0116115	0.00641033	-0.00979512	0.0223281	-0.0117986	0.00111404	-0.00452315	0.00879579	0.00510978	-0.00798394	-0.00357548
GRHL1_HUMAN	-0.00602831	0.00634931	0.0322538	-0.0341623	-0.00595603	0.0378452	-0.0185344	-0.00292294	0.0501819	0.00176257	-0.0178357
EWS_MOUSE	0.000611763	0.00627983	0.0173998	0.00989987	-0.0269885	-0.00256325	-0.0147177	0.0233923	0.040844	0.0268653	0.00117257
BAMBI_HUMAN	0.0751823	0.00625759	-0.0273058	0.000498305	-0.0785555	0.00636137	-0.0525997	0.00665859	0.068605	0.0237642	-0.020852
HACD4_HUMAN	-0.00130954	0.0062194	-0.0112825	0.0223269	-0.00153226	-0.0146646	0.00227967	0.00783546	-0.0361638	-0.0495053	0.0103801
CASP7_HUMAN	-0.0207428	0.0062062	0.0398133	-0.0113323	-0.00349013	0.0141195	0.00746808	-0.00243181	0.00147966	-0.0336528	-0.000870464
KDM6B_HUMAN	-0.0027936	0.00620524	0.0169015	-0.0129626	0.0188651	-0.0467598	-0.0110199	0.0120936	0.0427349	0.0141847	-0.00489446
CDSN_HUMAN	-0.0259927	0.00618899	0.0266436	0.0122373	0.00625651	-0.0244481	-0.0864225	-0.0276314	-0.00392273	-0.0398372	0.00255663
ARMC5_HUMAN	-0.00992008	0.00610583	0.0210427	-0.020075	-0.0229455	0.0123397	-0.0183042	0.0404182	0.00059738	-0.0257044	0.00147407
TOR1B_HUMAN	0.000668969	0.00606224	0.0234768	-0.0169316	0.00839573	-0.016137	-0.00095129	-0.00911147	0.0153388	-0.0118014	-0.00409089
SPRTN_BOVIN	0.00393883	0.00604938	-0.00390157	-0.0252455	-0.0248985	-0.00485985	-0.0162303	0.010878	-0.0315105	0.0128264	-0.0163444
K1C17_MOUSE	-0.0337022	0.00604118	-0.0370046	-0.00274566	0.0642153	-0.0219489	0.0409231	-0.115044	-0.00498642	-0.00540096	0.00283728
PPR36_HUMAN	-0.00593433	0.00601559	-0.00189127	-0.00355059	0.00755504	-0.00732622	0.00908862	-0.00997182	0.00926101	-0.0412998	0.00164525
SLAF7_HUMAN	-5.13228e-06	0.00596759	0.027515	0.0023486	-0.0375686	-0.016092	0.0228395	0.0123645	-0.026283	0.0125627	0.00317641
SO1A5_MOUSE	-0.0136477	0.00593641	0.0117287	-0.0348459	0.0117043	-0.0146066	-0.0223569	-0.00400755	0.0126349	0.0186452	0.00243872
EGR4_HUMAN	-0.00320047	0.00593385	0.00393431	-0.00728085	-0.000775204	-0.000573913	-0.00786699	-0.00227621	0.000894936	-0.0120432	0.00423155
RASM_HUMAN	-0.00393683	0.00590563	0.00495874	-0.00120509	0.0264757	-0.00340627	0.00980545	0.0315624	-0.0201844	-0.0214388	0.00129239
RPAB4_MOUSE	0.0621586	0.00590342	-0.0317054	0.0342054	0.023734	-0.121126	0.00914581	-0.0276682	0.0862681	-0.0151312	0.00869899
BASP1_BOVIN	-0.00831999	0.00584169	-0.0131125	0.0277316	0.0069427	-0.00401978	-0.000106186	0.0159028	-0.00347807	-0.0236749	0.00470215
LMO7_HUMAN	-0.0152727	0.0058301	0.0308687	-0.012837	0.00527281	0.00848392	-0.0272397	0.00145575	0.00309486	0.0236885	0.00847481
SPRE_HUMAN	0.00122357	0.00574886	-0.00715918	0.0304759	-0.043091	0.0173951	0.00268539	-0.00498081	-0.019117	-0.0716086	-0.0132734
INGR2_HUMAN	-0.00465538	0.00572238	-0.0399477	0.0571239	-0.0359865	-0.0265267	-0.0267343	-0.0200602	0.00424523	0.0013954	0.0382691
EMR3_HUMAN	-0.0160939	0.00572165	-0.00756568	0.0323149	-0.0132302	0.00440113	-0.0138077	0.0024805	0.00823576	-0.0182935	0.000605666
NUAK2_HUMAN	-0.0161202	0.0057035	0.00497022	-0.0182377	-0.0174027	0.0136194	-0.00654553	-0.00431099	-0.0357315	-0.00888524	0.00455863
IRAK2_BOVIN	-0.0124616	0.0056821	-0.0315902	0.0102499	0.0197594	-0.0244251	0.00462591	-0.0159315	-0.0157542	-0.00553884	0.00822488
TLR9_FELCA	-0.00699756	0.00560723	-0.0063828	-0.0126266	0.00230409	-0.00133997	-0.00236351	-0.00533027	-0.000575124	-0.000858359	0.00430926
PPIP2_HUMAN	0.00529735	0.00560352	-0.00615535	0.0176929	-0.00636847	-0.0273543	-0.0219022	0.0077656	0.0273846	-0.0140219	0.00231654
PP1RA_PIG	0.00698924	0.00558003	0.048456	-0.00630014	0.0458746	0.00132856	0.00113041	0.0215532	-0.024097	-0.0349396	0.0145998
CD86_RABIT	-0.00826697	0.00550089	0.0081944	0.00355358	0.0066618	-0.000667619	0.00295763	-0.00844199	-0.00238283	0.00576703	0.00563836
CAH2_HUMAN	-0.0270598	0.00539899	-0.0112076	0.0500335	-0.0412126	-0.00358991	0.00662345	0.0190525	0.0311787	-0.0365463	0.00508392
COL12_HUMAN	-0.00302648	0.00529573	0.00492859	-0.00912288	0.0061568	-0.00257167	0.00482655	-0.00402867	-0.00350515	0.00656504	-0.0171075
BCL9_HUMAN	-0.000782089	0.00527884	0.00761812	0.00101608	0.000755578	-0.00506083	0.000293616	-0.000156099	-0.000782662	-0.0048786	-0.0039598
GXLT1_HUMAN	-0.00241192	0.0052147	-0.0268879	-0.021858	0.0104265	-0.00352505	0.0083156	-0.00654914	-0.0206924	0.00387008	-0.00163446
NUMBL_HUMAN	-0.0105715	0.00511233	-0.0303526	0.0418846	0.0600317	0.036792	0.00267679	-0.0248935	0.0117791	-0.0363308	-0.0347312
ACNT2_RAT	-0.00919491	0.00510857	0.0286679	-0.0189203	0.0196345	-0.0172241	-0.00102526	0.0168812	-0.00716148	-0.0373823	-0.00123143
MFGM_PIG	-0.00944631	0.0050407	9.42235e-05	0.0284233	-0.0283254	-0.0061036	0.0100888	-0.0115375	-0.0258928	-0.0333883	-0.036947
UBE2C_MACFA	-0.00734605	0.0050004	0.00787317	0.00710195	-0.00318473	-0.00116944	-0.00437801	0.00257468	0.00202593	-0.00938848	0.0103902
DDR1_HUMAN	-0.0125297	0.00497834	0.00487508	0.0209468	0.00295901	0.0243521	-0.000195494	-0.0208032	0.0290902	0.0208942	-0.0426933
RTN3_PONAB	-0.00233318	0.00478037	0.0345113	-0.00121586	-0.0181048	-0.0149296	0.00574875	-0.0273377	0.0152246	0.0131806	-0.0405508
ZN407_HUMAN	0.0171021	0.00473272	0.00452679	-0.00492068	0.0136777	0.0178596	-0.00451743	0.00425118	0.0131858	0.0183306	-0.00243956
MCLN3_HUMAN	-0.00775632	0.00469494	0.00316164	-0.0065316	0.000805698	-0.0260076	-0.00397078	-0.0026954	-0.00273443	0.0240723	-0.00376018
WSB1_HUMAN	0.00598793	0.00465199	0.0173422	-0.0441465	-0.015675	0.0181765	0.0232702	0.0338023	0.042596	0.00265647	0.010521
S26A2_HORSE	0.000722496	0.00461817	0.0100932	-0.0107981	0.0384328	-0.00536248	-0.0220071	-0.0170515	-0.0217808	0.0434796	-0.00365597
PA24E_HUMAN	-0.00592908	0.00459374	-0.0058387	-0.0105476	-0.0017751	-0.003503	0.000888364	0.00424439	0.000164651	-0.000507247	-0.00982814
NR1D2_HUMAN	0.0367089	0.00457243	-0.0112361	0.00940756	-0.0043624	-0.020341	-0.00578234	-0.00449413	-0.00648477	0.0188751	0.00961258
LIPH_HUMAN	-0.00902163	0.00455483	0.0425252	-0.00719347	-0.00232705	-0.00935669	0.0131545	0.0283782	-0.0353309	-0.020616	0.0112851
MAPK3_BOVIN	-0.00539468	0.00453391	0.0178274	0.0133615	-0.014129	-0.00250221	-0.00169324	-0.010576	0.0060377	-0.00808285	-0.0402847
HPS3_HUMAN	0.0171408	0.00450711	0.0037009	-0.00170581	0.00392373	-0.0172856	-0.00605621	-0.0115318	-0.00588075	0.0159963	0.0013461
GAS7_HUMAN	-0.00719942	0.00449683	0.00868263	0.00555799	0.00257368	-0.00283049	0.00617688	0.00112334	-0.00163735	0.0060829	-0.00811879
HIC2_HUMAN	-0.0078271	0.00447066	0.0132252	-0.00818417	0.00516452	-0.00285285	-0.00283524	-0.00587099	-0.00079278	-0.00527001	0.00994541
PSTK_HUMAN	-0.00807881	0.00444228	0.00985122	0.00286639	0.00795618	0.0173744	0.00624239	-0.00785118	0.000482024	-0.0224326	0.00320459
FADS3_BOVIN	-0.0277571	0.00429929	0.00629264	0.00764513	0.0111424	0.0209426	0.0220214	-0.0323596	0.049181	0.0279886	-0.0193696
ZFYV9_HUMAN	0.0239893	0.00423437	0.00561574	-0.00423284	0.00327498	0.0138882	-0.0168459	0.00020179	-0.0029278	0.0312197	-0.000617213
RBM19_HUMAN	0.0665136	0.00422898	0.00381212	0.0118178	0.0673068	0.0113271	-0.0855347	0.0651099	-0.0707786	0.064877	-0.0127906
XCT_MOUSE	-0.00613557	0.00421139	-0.0113874	6.08976e-05	0.00679568	-0.00239842	0.0179892	-0.00197819	-0.00546279	0.0284639	0.00253272
BSSP4_HUMAN	-0.0301144	0.00417223	0.0302886	-0.0972073	0.02134	-0.026678	0.0100326	0.0199019	-0.0335524	-0.0270666	-0.0105728
NATD1_HUMAN	-0.00667664	0.00415419	0.0106383	0.007552	0.00977725	-0.00670351	0.00852106	-0.0257769	0.00193431	0.000917204	-0.00433255
ZN304_HUMAN	-0.00962463	0.00411065	-0.0100084	0.0247842	0.011637	-0.0222826	-0.00396511	-0.0217376	0.0220684	-0.0140099	-0.000801364
ILRL1_HUMAN	-0.00775791	0.00409304	0.00240984	0.0142835	0.00702555	0.00331797	0.00206134	-0.0139772	-0.00203893	0.00900992	0.00985809
1433Z_PONAB	-0.00536456	0.00404591	0.0112311	-0.0158269	-0.0189428	-0.00979534	-0.00263936	-0.0026249	0.00333133	0.0153043	0.0742255
NHLC2_HUMAN	0.0257993	0.00398629	-0.00987327	0.00117388	0.00746559	-0.0131998	-0.0129953	0.00322969	0.0236412	0.0103134	0.00542688
PCAT2_HUMAN	-0.00728001	0.00394695	-0.0120131	-0.019612	0.00077481	-0.025625	-0.037296	-0.017373	0.0110294	0.00930069	-0.0175743
ABLM3_HUMAN	-0.00946629	0.00394208	0.0399474	-0.0142583	0.000812141	0.0168986	0.0304228	-0.0221872	0.0491435	0.03455	-0.00446302
PHAR4_BOVIN	-0.00160897	0.003923	0.0257225	0.0079704	0.0222784	0.0074065	0.0044616	-0.00360632	0.0184649	0.000230691	0.0182215
PLD1_CRIGR	-0.00102458	0.0038744	0.000204971	0.00774798	0.00912048	0.0127677	-0.00708109	0.00521821	-0.00997522	-0.0112392	0.010375
RELL1_HUMAN	-0.00328561	0.00375849	-0.0188645	0.0148508	0.0178138	0.0651117	-0.00891313	-0.0428943	0.00674063	-0.0233858	0.0290272
WDR47_HUMAN	-0.00314942	0.00374894	0.00904597	-0.00177146	0.00636477	0.0104203	0.0261976	0.0114074	-0.00333516	-0.00318679	0.000659148
TANC1_HUMAN	-0.00979538	0.00369921	-0.00417882	-0.00932491	-0.00051947	0.00513029	0.00337974	0.0273317	0.0149842	0.0159538	-0.00312103
CLD17_HUMAN	-0.0109713	0.00367697	-0.00382473	0.00180547	-0.0109401	0.00169559	-0.0222306	0.00040698	0.00840245	-0.0314429	0.000717736
AL3A2_MACFA	0.00103769	0.0036533	0.0102711	0.00361099	0.00367484	-0.00741076	-0.0248943	0.00614081	0.016932	0.0259207	0.00394521
SPX2_HUMAN	-0.00546974	0.00361456	0.00315598	-0.0259815	-0.0249307	-0.00705071	-0.0464631	0.0266727	0.0281153	-0.0155027	-0.00529337
AKNA_HUMAN	-0.00682165	0.00358727	0.00208624	0.0178623	-0.00296576	0.00280518	-0.00538219	-0.00279266	0.0024336	-0.00637204	-0.00140173
AQP9_HUMAN	-0.00682165	0.00358727	0.00208624	0.0178623	-0.00296576	0.00280518	-0.00538219	-0.00279266	0.0024336	-0.00637204	-0.00140173
DPOLL_MOUSE	-0.00682165	0.00358727	0.00208624	0.0178623	-0.00296576	0.00280518	-0.00538219	-0.00279266	0.0024336	-0.00637204	-0.00140173
HVCN1_HUMAN	-0.00682165	0.00358727	0.00208624	0.0178623	-0.00296576	0.00280518	-0.00538219	-0.00279266	0.0024336	-0.00637204	-0.00140173
ZCCHV_MOUSE	-0.0188893	0.00357525	0.00404213	-0.0128962	0.00633607	-0.018049	0.0329055	0.0301691	-0.0248791	0.0147832	-0.0054602
DAP1_HUMAN	-0.00312249	0.00349654	-0.00591303	0.0226269	-0.00515812	0.0134743	-0.027993	-0.050721	0.0573299	-0.00536932	-0.0843632
TTMP_HUMAN	-0.0144891	0.00345049	-0.047374	-0.0286518	-0.00830957	-0.00474024	-0.00333542	-0.00530199	-0.00556876	9.21239e-05	0.00886047
HS105_BOVIN	-0.0092557	0.00344426	0.0276547	-0.00760118	0.00562185	-0.0371146	-0.000877977	0.0261739	-0.00395667	-0.0152821	0.00910027
JAML1_HUMAN	-0.0294746	0.00343011	-0.0102707	0.0808403	0.0203844	-0.00761742	0.0243754	-0.00120201	0.0337412	-0.0178065	0.0037924
KDM2B_MOUSE	-0.00256204	0.00337888	0.0036551	-0.0144784	-0.0119138	0.0231407	0.00104239	-0.0120127	0.00839305	-0.00914136	0.000701861
EREG_HUMAN	-0.0377922	0.00334641	-0.113967	-0.0841038	0.0158435	0.0180813	0.0238218	-0.0690528	-0.00959428	-0.0174422	-0.014132
GSH1_HUMAN	0.00488759	0.00332277	0.0179921	0.00649964	0.00742697	-0.00947515	0.0195453	0.019556	-0.0305272	-0.00735354	0.00804426
BIRC3_HUMAN	-0.0174571	0.00325579	0.0432174	-0.0306208	-0.0358921	-0.0308063	-0.00369039	-0.0495196	-0.0276982	0.0340555	-0.0281273
S38A2_HUMAN	-0.00122549	0.0032459	0.0322347	-0.0431408	0.0111627	-0.0500403	0.00231229	0.0172451	-0.00571766	-0.00214697	-0.0237319
ZN207_MOUSE	-0.0170863	0.00323061	0.0495296	-0.00442216	0.00487551	-0.0324626	0.0112415	0.0319704	-0.031115	-0.022611	-0.0411096
CYTX_BOVIN	-0.0754494	0.00321977	0.125562	0.0242078	0.00705692	-0.0661933	0.0990882	0.165602	0.0117638	0.0504702	0.0293297
SOAT1_HUMAN	-0.00310606	0.0032189	0.00888062	0.0108872	0.0322111	-0.0221573	-0.0107485	0.0408555	-0.0154979	0.0128255	0.00877411
GP132_HUMAN	-0.00720734	0.00320679	0.00830518	0.000464227	0.00527356	0.000375193	-0.00352481	-0.0100426	-0.000472946	-0.00266015	0.0100863
ZN394_HUMAN	0.0368336	0.0031364	0.00794383	-0.0028367	-0.0251504	-0.0305119	0.00274634	-0.0029927	-0.00116502	-0.000175051	0.00100242
TF65_HUMAN	-0.00969384	0.00306936	-0.00379718	0.0455227	0.00537264	-0.0158216	-0.00427912	-0.0260951	-0.00093344	-0.0106588	0.00818305
MAFA_XENTR	-0.0150104	0.00304131	0.0456801	-0.0251606	-0.0147848	0.0151512	0.00719279	0.0310112	0.0219823	-0.0113637	-0.00666407
CDR2_HUMAN	-0.00562485	0.00300921	0.00517328	-0.0105041	-0.0356509	-0.021966	-0.000143735	-0.000662669	0.0218521	0.00679977	0.00860427
DIEXF_HUMAN	-0.0154236	0.00298347	0.0269963	-0.0207171	0.0226531	0.0243901	-0.00914241	-0.00653125	-0.00837946	-0.0414687	-0.0101851
GLSK_RAT	0.00327515	0.00297966	-0.0336813	-0.0262404	0.0264858	-0.00617254	0.0315604	0.0130499	0.00932756	0.0130368	-0.00970845
ABLM2_HUMAN	-0.0138054	0.00297797	0.0208849	-0.00491442	-0.0216971	-0.00134279	0.00406625	-0.013256	0.0501614	0.0157425	-0.0124834
VATB2_BOVIN	0.00386764	0.00297144	0.0205874	0.00129766	-0.0296742	-0.00149696	-0.0384265	0.0332638	0.0314823	-0.0483359	0.00447762
UBP30_HUMAN	0.0338501	0.00295719	0.00505121	0.0194374	-0.00134404	0.0193295	-0.0133139	-0.0111172	-0.00695699	-0.00765338	-0.00872207
RASF5_HUMAN	-0.00941727	0.00294921	-0.0027595	0.00944911	0.000659317	-0.00785645	-0.0146774	0.0113663	0.00266354	-0.0424773	0.00395388
TR19L_MACFA	-0.00583815	0.00291452	0.0205096	-0.00600575	-0.0230824	-0.0106278	0.0315347	0.0174325	0.00205065	-0.0559429	-4.72224e-05
CEGT_HUMAN	0.00416249	0.00281797	-0.0399299	-0.0208992	0.0371658	-0.0475132	-0.00687834	0.0548967	-0.0640757	-0.0571902	0.0068615
OSGP2_HUMAN	0.0371751	0.00279542	-0.00405259	0.0267279	-0.0202599	-0.0585398	-0.0712466	-0.0066559	0.0150808	0.0403841	0.000403968
PLPL1_HUMAN	-0.00918197	0.00276439	0.00767981	-0.00947323	0.0297633	0.00556075	-0.0072508	0.00630023	0.00612631	-0.011222	-0.0030971
FURIN_BOVIN	0.00208298	0.00260428	0.0179085	0.0356805	0.0256806	0.0137084	0.0293137	-0.0362719	0.00464102	-0.0399781	-0.0103306
ZN329_HUMAN	-0.0109577	0.00258854	0.0217392	-0.00749741	0.00685129	-0.00675761	0.00434099	-0.000770682	-0.0016877	0.000885698	-0.00462228
LYSC_RABIT	-0.00422665	0.00253042	-0.0130703	-0.0612483	-0.00249871	0.00282715	-0.0165838	-0.05743	0.0595749	0.00957511	0.0797371
ISG20_HUMAN	-0.0254103	0.00251331	0.0303494	0.0178004	0.0123778	0.0149135	0.00869367	-0.0233631	-0.013212	-0.0081587	0.00665497
SC24A_BOVIN	-0.00642071	0.00250346	0.00504815	-0.0179493	-0.00102602	-0.0172767	0.00801467	9.84151e-05	0.0185336	0.0170211	0.00740249
EI2BA_PONAB	-0.019135	0.00243417	-0.00233398	-0.0775442	0.00843666	-0.00950629	-0.0558794	0.0566795	-0.00129767	-0.0882422	0.00914441
CSF2R_HUMAN	-0.00563241	0.00241821	0.00276295	0.0206251	-0.00801945	0.000159889	-0.00143219	0.00895627	0.00336992	-0.00600373	-0.00109351
PLPL8_HUMAN	0.0236189	0.00240202	-0.00164261	0.00706756	0.0430299	-0.0178376	-0.0172753	0.0151977	-0.0584676	-0.00392882	0.00214168
BCORL_HUMAN	-0.00557438	0.0023055	0.014578	-0.00368798	-0.00398885	-0.00781165	0.00447809	0.0156961	0.000863591	-0.00455453	0.0071002
NELFA_HUMAN	-0.00198058	0.0022697	0.0253346	0.0134235	0.00163852	-0.0121377	0.0305946	-0.00799911	0.0127949	0.00523237	0.0205274
RL22L_HUMAN	0.0450386	0.00226766	-0.0088267	0.0484787	0.0632572	-0.0311083	-0.0169621	-0.00583051	0.0234634	0.00230768	-0.00236972
LSM2_MOUSE	-0.0107434	0.00226306	-0.00186896	-0.00516004	0.00762464	-0.000467666	0.00116345	-0.0122693	-0.00147971	0.00700442	0.00194781
HCD2_BOVIN	-0.000917541	0.0022447	-0.0131203	-0.00382599	0.0115353	0.0051526	-0.0397347	0.0172895	-0.0280858	-0.000908723	-0.00985415
IFIT3_HUMAN	-0.00492554	0.00222275	0.016942	-0.00983484	0.0482365	0.0117079	-0.0295202	-0.0211565	-0.0172114	-0.0222455	0.00118087
LAT1_HUMAN	-0.00934485	0.00218525	0.0312595	0.0247243	0.032761	0.0456556	-0.0249685	-0.0295557	0.0383075	-0.0333633	0.0384183
MYCT1_HUMAN	-0.00697568	0.0021659	0.00956328	-0.00210992	0.0122676	-0.00145844	0.00808096	-0.0124671	-0.00462132	0.0146455	-0.0118687
DNSL3_RAT	-0.0187375	0.00209047	0.0269551	0.0140529	0.00698618	-0.0134647	-0.111897	-0.0428643	0.0795178	-0.0477864	-0.0325685
ETV6_HUMAN	0.000762911	0.00207261	0.00395373	-0.00348045	0.0124242	0.00182955	0.00395583	-0.00326857	0.0161002	-0.021597	-0.00630606
MOCOS_BOVIN	-0.00437296	0.00206448	0.00823163	0.0455667	0.00189237	-0.018205	-0.0445367	-0.0546616	0.0209048	-0.0227791	0.00753151
UBE2A_MOUSE	-0.00454742	0.00206268	0.00972497	0.0081921	0.00191452	-0.00423753	-0.0406667	0.0246663	-0.025628	0.0499737	-0.000974591
LGUL_RAT	0.00126633	0.00206189	0.00288816	-0.0104356	-0.0128834	0.00498882	-0.0303998	0.00388213	-0.0272529	-0.00553691	-0.0324359
STEA4_HUMAN	-0.0399411	0.00206062	-0.00444611	0.00846403	0.0171142	-0.0171731	0.0113631	-0.0650034	-0.0358401	0.0298512	0.0177571
LENG9_HUMAN	0.0661518	0.00204495	-0.006608	-0.0294682	0.00578886	0.0573127	0.0451892	-0.0221027	-0.0204789	-0.0636761	0.0437529
FUS_MOUSE	-0.00332379	0.00203212	0.0125428	-0.00924876	-0.0225134	0.0247858	-0.0496905	0.0417835	-0.00765696	0.016492	-0.0321043
CP26B_BOVIN	-0.0167122	0.00202494	0.00966182	0.0316144	0.00579714	0.0500031	-0.0246281	0.00172506	0.0158095	0.0221073	0.0105385
PPT1_MACFA	-0.010601	0.00199734	-0.0214109	-0.00678353	0.0112465	-0.0358878	0.00815707	0.0195915	-0.00903547	0.0175393	-0.00124736
ZNF79_HUMAN	-0.00147977	0.00195818	0.0116203	-0.0296712	-0.0174896	-0.0168565	-0.000829503	-0.0217164	-0.00790659	-0.00373762	0.000742586
ANFY1_MOUSE	-0.00276343	0.00188646	-0.0141403	-0.000966588	-0.000390174	0.0119846	-0.0205029	0.0225397	-0.0252801	-0.00993354	0.00268905
RHDF2_CANFA	0.000291885	0.0017733	-0.00708017	0.0179202	-0.0147593	0.0174962	-0.0408758	-0.0230731	-0.0232637	-0.0385964	-0.00423023
ZN217_HUMAN	-0.00662993	0.00175804	0.00254203	0.0109896	0.00555113	0.00430493	-0.00445774	-0.0153932	-9.99432e-05	0.000438054	-0.00685554
ZN623_HUMAN	-0.00617097	0.00175351	0.0186988	-0.0178479	-0.000846239	-0.00675074	-0.00722141	0.0056392	0.00213113	-0.0182107	0.00873213
SIAT9_HUMAN	-0.0118306	0.00173203	0.00652352	-0.00235085	-0.00560262	0.00704413	0.00301074	-0.00461527	-0.0208873	0.00523556	-0.000354581
SENP2_HUMAN	-0.00347852	0.00171672	-0.0102848	-0.00567268	0.0334531	-0.0173786	0.00199964	0.0125207	-0.00492401	0.00346382	-0.0195274
PDLI4_BOVIN	0.0477188	0.00167967	0.00307507	0.0330335	-0.0700551	0.0248595	-0.0028338	-0.0320013	0.0175307	-0.0216534	-0.000984884
RNLS_HUMAN	0.00436345	0.00164992	0.00796469	0.0173853	-0.034892	0.0255904	-0.0056125	0.0215618	-0.0138993	0.0096287	-0.00123042
SETD8_BOVIN	-0.0112963	0.00155987	-0.0404719	-0.0243211	0.0261613	0.0273605	0.0194215	-0.00793394	0.0450469	-0.037727	-0.033658
ACACA_BOVIN	0.0530611	0.00155332	-0.0154388	-0.00718115	-0.00211039	0.0503618	-0.0364337	0.0383108	0.0208154	-0.012202	-0.00691132
GNAI3_MOUSE	0.0336222	0.00153397	-0.00383709	0.0131776	0.000368065	0.0406221	-0.0356279	0.00487027	-0.0230445	0.00664235	-0.00125633
CDC20_HUMAN	0.0333053	0.00151805	-0.015516	0.0121739	-0.00464325	0.0193238	0.0171978	0.0239567	-0.0267105	-0.069329	0.00289661
GRP75_CRIGR	0.0217665	0.00151109	-0.00413292	0.0114939	0.0201492	0.0297333	0.0390999	0.00708846	0.0119736	-0.0131958	-0.00146383
GNA12_HUMAN	0.000268854	0.00149626	-0.00554732	-0.0067414	0.020625	0.00940958	0.0336489	-0.0469032	0.0397686	0.0100883	0.0142004
CAZA2_RAT	-0.0201127	0.00149556	0.0146729	0.0057887	-0.00185972	0.0205565	-0.00704607	0.000675174	0.0457237	-0.0100795	-0.00562412
BBC3_HUMAN	0.0699037	0.00147705	-0.0248685	0.000501069	-0.0225184	0.000666608	-0.0229786	-0.00177931	0.011454	-0.00881231	0.0316219
RUNX1_HUMAN	-0.0104068	0.00143905	-0.0476931	-0.014243	0.0225787	-0.0133873	0.0190293	-0.0272115	0.0145997	-0.0670736	0.0104458
EAA3_BOVIN	-0.0155458	0.00141779	-0.012304	-0.00050506	0.0246189	0.0431095	0.0701668	-0.0131623	-0.0440184	0.0195997	-0.0166383
GAS1_HUMAN	0.0613341	0.00136371	-0.0310024	-0.00506711	-0.0356838	0.0142165	-0.0253382	-0.00263562	0.00169651	-0.0109967	0.00193006
SNX29_BOVIN	0.00317725	0.00131437	-0.0130091	-0.0139113	0.00011743	0.015902	-0.00317764	-0.00183913	-0.00731871	0.0135915	-0.00233003
KRI1_BOVIN	-0.00257101	0.00126887	0.0246208	-0.00905608	-0.00394483	-0.00699372	0.00230724	-0.00563221	0.0387571	-0.000293167	0.0060812
RGMB_HUMAN	0.0582255	0.00126756	-0.021487	0.000493814	-0.0149621	-0.0100618	-0.0187585	-0.0133246	0.00158323	-0.012985	-0.0342389
DUS2_HUMAN	-0.00892965	0.00126571	-0.00995508	-0.00188143	-0.0250536	0.0176312	-0.00321092	0.00345794	-0.0346608	-0.00298881	0.00269795
SNF8_HUMAN	0.0306012	0.00123459	-0.00809428	0.0420361	0.0086795	-0.0183915	-0.0143257	0.010705	-0.0128392	-0.0599899	0.0219791
MUM1_HUMAN	-0.00457344	0.00119137	-0.000650234	-0.0216434	-0.00507172	0.0218875	-0.0172542	-0.0146758	0.0190325	-0.0197527	-0.0032936
NDRG1_MACFA	-0.0147908	0.00117556	-0.00619568	0.0213629	-0.0684611	0.0542671	0.0212051	-0.0269008	0.0589871	0.00534632	-0.00456003
REEP5_PONAB	-0.000226592	0.00106348	-0.00947709	0.0196582	0.010851	0.0152365	-0.0276623	0.0137534	0.0344132	-0.00598995	0.00887574
ZN384_HUMAN	-0.000514681	0.00103079	0.0320741	0.0217338	0.00503916	-0.0293399	-0.00344613	-0.0267226	-0.00648481	0.0185037	-0.000770538
LGR5_BOVIN	-0.0084091	0.0010301	-0.022145	-0.0337284	0.00632634	-0.0186046	0.00464508	0.0339524	-0.00396703	-0.0264749	-0.00286682
NCF2_HUMAN	-0.0120999	0.00101692	-0.00814594	0.0171577	-0.0216519	-0.0237005	-0.0206337	0.0157598	0.00885941	-0.00355266	0.00280492
NXF1_BOVIN	0.0416758	0.00101371	-0.0170384	0.0137821	0.00831966	0.0321518	-0.013806	0.00732764	0.0220142	0.0185196	0.00486697
NR1D1_BOVIN	0.03324	0.000918052	0.00153381	0.00601068	-0.0273753	-0.0153028	-0.00220482	-0.0317449	0.0923139	0.0335874	-0.000714047
ZCCHV_HUMAN	-0.00439586	0.000917443	0.0271566	-0.00881738	-0.00194455	-0.0161702	0.0101171	0.0208766	-0.000248961	-0.00496231	-0.00233672
TMC7_HUMAN	-0.00921291	0.000911221	-0.00704319	0.0121894	0.00143037	-0.00150348	0.0121693	0.00177807	-0.00138869	0.0184324	0.00823911
SPHK2_HUMAN	-0.00130718	0.000893395	0.00783264	-0.00862692	-0.00343078	-0.0074773	0.000201734	-0.0283528	-0.0320187	-0.0152589	-0.00262516
PTRF_RAT	-0.00246469	0.000851581	-0.0147547	-0.000226268	-0.0305196	0.0304427	-0.0132339	-0.00860323	0.028096	-0.0292734	0.00377795
DEND3_HUMAN	-0.00564522	0.000807792	0.00231595	0.0142603	-0.0046586	0.00413997	-0.0135108	-0.00493187	0.0048211	-0.0169014	-0.00740393
LIPP_HORSE	-0.0163179	0.000800149	0.010982	0.051551	-0.0105267	0.00258439	-0.00303218	0.00740985	0.00684953	-0.00783084	0.00109626
MCM4_HUMAN	0.0504199	0.000791378	-0.00149071	-0.0208799	-0.037165	0.00801916	-0.0171611	0.0376478	-0.0447539	0.0101253	0.00551056
TRHDE_HUMAN	-0.00554423	0.000769836	0.00303451	0.0128736	0.00148136	0.00212043	-0.00121535	-0.00581367	0.000627944	0.000773266	-0.0146884
RASEF_HUMAN	-0.00607543	0.000704544	0.00259107	0.0122186	0.000578456	-0.0299067	-0.0202738	0.01944	-0.000481479	-0.0268907	0.00205157
ZEP2_HUMAN	-0.00559024	0.000695877	0.0141205	-0.0100221	-0.000633283	-0.00382132	-0.00761345	0.00179681	0.00231937	-0.0154617	0.00218034
MAFK_MOUSE	-0.00761992	0.000666294	0.00127608	-0.0169445	0.0277636	-0.0265415	0.0226232	0.0288303	-0.0208921	-0.0544078	-0.0208477
LRIG1_HUMAN	0.0443333	0.000634609	-0.00143408	0.00746986	-0.0107879	0.0019788	-0.0102595	-0.0389331	0.0730407	0.0276891	0.00294204
ZAP70_HUMAN	0.031758	0.000605674	0.00631683	-0.00544103	-0.00880898	0.00177128	0.00422621	-0.00596087	0.0411983	0.00719149	0.00151133
IL1RA_PIG	-0.00910422	0.000603453	-0.0322639	0.00685774	0.0100263	0.0188141	0.0302275	0.00646974	-0.0233936	0.00385755	0.00847664
AP2B_MOUSE	-0.0225137	0.000554418	-0.0202769	-0.0224035	0.0839301	-0.00650682	0.0379185	-0.0755582	0.0609391	0.00470147	0.0144617
GDIR2_BOVIN	-0.00486791	0.000551429	-0.00870543	0.0102762	0.0107701	0.0122727	0.0101207	0.0367446	-0.0246665	-0.0165847	-0.0655893
CHD2_HUMAN	-0.00970107	0.00053996	0.0165303	0.00757352	-0.00536397	-0.0121989	0.00100627	-0.00468006	0.0293534	0.0149325	0.00049875
PAPS2_HUMAN	-0.0132034	0.000500102	-0.0106846	0.0169213	0.0154922	-0.0122522	0.059278	0.0026242	0.0289678	-0.00647511	0.00998452
CLK1_HUMAN	0.0678354	0.000488032	-0.0126789	-0.0290365	0.0163296	-0.00170341	-0.0240309	0.00904885	-0.00235169	-0.0358838	0.0159818
K1683_HUMAN	-0.00603908	0.000478657	0.00858727	-0.00327288	0.00367721	0.00164313	-0.0114588	-0.0121595	0.00183822	-0.0129476	0.00620679
GSDMC_HUMAN	-0.0174198	0.000450212	0.0474587	-0.0264286	-0.00951725	-0.0151557	-0.0224208	0.0201145	0.00978033	-0.053425	0.001224
AR6P6_BOVIN	-0.00178176	0.000408355	-0.00335902	0.0165398	-0.00494506	0.000938103	0.00276268	-0.00519592	-0.0099719	0.00228412	0.00891295
PTHR_CANFA	-0.00460498	0.000252388	-0.0240949	-0.0167131	0.00808171	0.00146773	0.010309	0.00865695	-0.0312705	-0.00404101	0.00272149
FHOD1_HUMAN	0.0463993	0.00023092	-0.00356486	0.0327064	0.0177586	0.0408761	0.0148532	0.0234105	-0.0430863	-0.0396349	-0.00935293
DLX2_MOUSE	-0.00684632	0.000195473	-0.0136999	-0.0182754	0.0177058	0.00912434	-0.0154158	-0.0434694	-0.00195221	-0.00014888	0.000242774
MKNK2_HUMAN	0.0635796	0.00019443	0.00955365	0.00653752	0.022392	0.0143127	0.0165599	0.00416623	0.0965504	-0.00691572	-0.0192529
CMKMT_HUMAN	0.0225386	0.000189119	0.000279555	0.00962222	-0.0200262	-0.050925	-0.0388125	-0.0209762	0.0372977	0.0434409	0.00313779
FGOP2_HUMAN	-0.00645749	0.000152805	0.0148603	-0.00817458	0.00832171	-0.0289509	0.0208011	0.0195487	-0.0268632	0.0222975	0.00256965
BI2L1_MOUSE	-0.000659844	0.00013678	-0.00873731	-0.00383116	-0.015769	0.00374463	-0.014906	-0.00989488	0.0172046	-0.00946799	0.00977145
PSME4_MOUSE	0.0253303	0.000104133	0.00370832	-0.00360382	0.023102	0.0148161	-0.00630784	0.0223223	0.0120273	-0.00326521	-0.00326536
IMA3_HUMAN	0.00472937	6.00917e-05	0.00446037	-0.0136651	-0.0201231	0.0211391	0.0308817	-0.00566029	0.00429903	0.00939317	-0.0155678
MTMR3_HUMAN	-0.000601742	4.22933e-05	0.0130291	0.0061356	0.00814509	-0.0092705	0.00383165	-0.0187614	0.0107308	0.0131577	-0.0050392
ILKAP_RAT	0.0188156	4.05117e-05	-0.0022728	0.00719783	0.0169999	0.000897757	-0.00624653	0.00572012	0.0356412	0.00572696	0.00261706
GT2D2_BOVIN	0.0427887	3.46864e-05	-0.00453748	-0.0081427	-0.0103449	0.0276722	0.0489586	-0.0149067	0.0561453	-0.0366266	0.0159565
CL029_PONAB	0.0344697	2.38235e-05	0.0107421	-0.0174678	0.0181887	-9.11428e-06	0.0706884	0.0260154	-0.0645503	-0.0247496	0.0132891
UBD2B_XENLA	0.0357525	1.63156e-05	-0.0111693	0.0189782	0.0652839	-0.0155799	-0.00313223	-0.000879942	0.0364812	-0.0248798	-0.00475078
OTOR_MOUSE	0.0259736	2.10477e-06	-0.0023046	0.00540863	-6.55054e-05	0.000322178	-0.00864515	-0.0246776	0.0209702	0.0093643	8.50042e-07
MIS_HUMAN	0.0160305	-4.67121e-05	-0.00249318	0.0117464	-0.0126412	-0.00751724	0.017658	-0.0115167	-0.039009	0.00155647	0.00563859
LBR_HUMAN	-0.00699492	-7.06838e-05	-0.00548482	0.0099056	-0.00897849	0.00222737	-0.00298339	-0.0185581	0.00623279	0.0146404	0.00873946
ES8L3_HUMAN	-0.00664754	-0.000104453	0.0219138	0.0250561	-0.000478866	0.0100986	0.0303477	0.00509024	0.0155351	0.0401406	-0.012765
HES4_HUMAN	-0.0120273	-0.000135147	0.0175446	-0.00396764	-0.0152833	0.0229384	0.024002	0.0111119	-0.0145989	-0.00709176	-0.00909361
ZNT2_HUMAN	-0.00884024	-0.000160546	0.00641864	0.0100629	0.0248128	0.0272046	-0.0228965	-0.0381573	0.0138419	0.00901471	0.000373832
LRBA_MOUSE	0.0312446	-0.000187006	-0.00830314	0.000918689	-0.0259476	0.00855169	0.0168798	0.00404583	-0.0192806	-0.00567053	-0.00043913
EPN1_HUMAN	-0.00494023	-0.000192902	0.00994684	-0.0196932	-0.0215351	0.00768281	0.0137676	-0.00921897	-0.0130693	-0.0209259	0.0178895
AT12A_HUMAN	-0.0168769	-0.000269629	-0.0304362	-0.0226261	0.032567	-0.015764	-0.00663245	-0.025298	-0.0502603	0.0268572	0.00065476
RHDF1_MOUSE	-0.00182293	-0.000274986	0.0336799	0.00310789	-0.0129312	-0.00675253	-0.0110301	-0.0124231	0.0145283	-0.0309427	-0.0202038
DGLB_HUMAN	-0.00757394	-0.000285035	-0.0234189	0.00535682	-0.0113333	0.0146722	0.00711644	-0.00115187	0.033942	0.000690895	-0.0022763
ANO1_MOUSE	-0.0097464	-0.000326394	0.0438939	0.0162923	-0.0202639	-0.0236467	-0.0268084	0.00600085	-0.00729793	0.0304594	0.0128405
CBPA2_HUMAN	-0.0228441	-0.000327066	0.0204995	0.0941551	-0.0378156	0.0111304	0.00936791	0.0353308	-0.0135027	-0.00208924	0.000166138
FKB1B_HUMAN	0.03496	-0.00034572	0.00570557	0.0245671	0.0138799	-0.0388204	-0.0527222	0.00398072	-0.0104214	0.0269139	0.00507124
NDE1_HUMAN	0.00350414	-0.000364234	0.02132	-0.00726309	-0.00325824	0.00904217	-0.0218857	0.0119225	-0.0114919	0.058561	-0.0111047
ANLN_HUMAN	-0.00182065	-0.000372286	-7.12161e-05	0.0150182	-0.0364422	-0.0256522	-0.00227529	0.0108004	-0.01748	0.0449972	0.00850389
I13R1_HUMAN	0.00213163	-0.000388365	0.0144233	0.0309987	0.00518272	-0.00132581	-0.0208455	0.00302034	0.00404539	0.011297	0.0210252
DCLK2_AILME	-0.00326145	-0.000410795	-0.00325233	-0.0286114	0.0223982	0.00382842	0.00859742	-0.00755339	0.0203313	-0.0194151	-0.00363959
RBM40_HUMAN	-0.00746089	-0.000420094	0.0127247	-0.0133133	0.000230396	0.0161143	0.00370394	0.012231	-0.00900885	0.0197129	-0.000549695
SUSD1_HUMAN	-0.00561896	-0.000449254	0.00379999	-0.0296786	-0.0282283	-0.00240678	0.0169169	0.00896966	-0.00344143	-0.0212674	0.000910351
ILF3_HUMAN	-0.00186296	-0.000462803	0.0473477	-0.00148661	-0.0246291	-0.0280823	0.0121032	0.000176841	-0.00415558	-0.000952775	-0.00149869
SMG9_BOVIN	-0.00140377	-0.000468842	0.00740049	0.025991	0.00529924	-0.0221272	-0.000886538	-0.0213751	0.0155763	-0.0108209	-0.00476894
GNA1_PONAB	0.00107268	-0.000480632	-0.00307295	-0.0159724	0.0234251	-0.0163968	-0.0384527	0.0133004	-0.00235749	0.0236063	0.0101432
B4GN3_HUMAN	-0.00496301	-0.000500154	0.00903705	-0.00122901	-0.000397824	-0.000530041	-0.00813124	-0.00255615	0.00255301	-0.0124855	0.00462068
K1161_HUMAN	-0.00496301	-0.000500154	0.00903705	-0.00122901	-0.000397824	-0.000530041	-0.00813124	-0.00255615	0.00255301	-0.0124855	0.00462068
ABRAL_HUMAN	0.0495574	-0.000553088	-0.0236172	-0.012724	-0.0371164	-0.00828529	-0.0365344	0.015431	0.036159	0.0289468	-0.0069733
SOSB2_BOVIN	-0.0252853	-0.000553619	0.016204	-0.00898644	0.0066132	-0.0645598	0.0169649	0.0451669	0.00271159	-0.0258357	-0.00347028
KHD3L_HUMAN	-0.00660071	-0.000565528	-0.0396433	0.00125349	-0.0149729	-0.00877642	0.00167396	0.0126986	0.0157105	-0.0410989	0.0105149
CC14B_MOUSE	0.00395128	-0.000578471	-0.0294751	-0.0080608	0.0335666	0.00957405	-0.00598472	0.0198484	0.0111603	-0.00780387	0.00862941
RS6_BOVIN	0.0232786	-0.000602426	-0.00974768	-0.00575093	0.00348389	-0.0244861	0.0239337	-0.0193563	0.00939039	-0.0059815	0.00352435
CEP68_MOUSE	0.0240913	-0.000649018	0.00239195	0.000527565	0.0114873	-0.0240542	-0.00753193	0.00543466	-0.00935793	-0.00799218	-0.0025299
MRP_RAT	-0.0197204	-0.000659218	0.0491271	-0.0116552	-0.0155039	-0.0203073	0.0234	0.039082	-0.00765947	-0.0550113	0.00324578
TENS4_HUMAN	0.0550043	-0.000685803	0.0117015	0.0182439	0.0137436	0.0484167	0.0576727	-0.0372448	0.0635302	-0.0612517	0.000676438
CLC1A_BOVIN	-0.00823773	-0.000692342	0.00400148	-0.0130636	-0.00161638	-0.00670266	0.00143562	0.00836283	0.00152611	-0.00342839	-0.00695876
EGFR_MACMU	-0.0095429	-0.000766184	0.0293341	-0.0171892	0.00633623	-0.00446475	0.000805786	0.0137979	0.0336912	-0.0453594	-0.00838856
RL11_PONAB	0.0321588	-0.000791358	0.00105236	0.00469612	0.0256554	-0.0279592	-0.0209008	0.0149821	-0.00275798	-0.00234886	-0.00143608
ZFP1_HUMAN	-0.00886107	-0.000804992	0.0225551	-0.00861325	0.00119992	-0.00796867	0.000950685	0.00748764	0.00107201	-0.00758546	0.0110813
ZN473_HUMAN	-0.00936662	-0.000814798	0.0175962	-0.00324277	0.00555322	-0.00285068	-0.003053	-0.00618232	0.000560752	-0.00564431	-0.00514924
TSN33_MOUSE	-0.00622544	-0.000834418	-0.000129149	-0.00230135	-0.0103998	0.00669255	0.00725536	0.00457583	-0.0216167	0.00886744	-0.000563075
IKBD_MOUSE	-0.00321248	-0.000838884	0.0200709	-0.0112767	0.0160631	0.00029838	0.0191181	0.00690621	-0.0552209	-0.00766574	0.00104945
S19A1_HUMAN	-0.00822432	-0.000872974	-0.0171661	0.0371803	0.00220907	0.00796476	0.0169436	0.0166423	3.32857e-05	-0.0153819	-0.00870987
MIPT3_HUMAN	-0.00555058	-0.0009032	-0.0117307	-0.017585	0.0207068	-0.0179122	0.0331269	0.0175566	0.021732	0.0276763	0.00271242
MAPK2_HUMAN	-0.0133096	-0.00100796	-0.00265552	0.0130341	0.0211893	0.0117019	0.0252024	-0.000989269	-0.00133572	-0.0229019	-0.0352055
LONM_BOVIN	0.00115584	-0.00105222	-0.0167581	0.0277231	-0.0123722	0.00523167	-0.0106866	0.0125814	0.0142703	-0.0098726	-0.0125019
COX3_MOUSE	0.0182133	-0.00109548	-0.00456753	0.00694966	-0.00712302	-0.0100297	0.0711766	-0.0379116	0.041073	-0.0506855	-0.000100976
RU2A_MACFA	0.0281893	-0.00110802	-0.00738103	0.0152975	0.039035	-0.00762839	0.0160034	0.00561479	0.0362349	-0.0253433	-0.00180627
AGO4_HUMAN	-0.0122277	-0.00113709	0.00334365	-0.00936828	0.0251776	0.0164536	-0.000135231	-0.00174122	-0.0168705	0.00465577	-0.00518025
ABHD5_HUMAN	-0.00765488	-0.0011592	0.0070206	0.0103807	-0.0191995	0.0130144	0.00394683	0.0331303	0.0201234	-0.00963587	-0.0398957
ARF4_BOVIN	-0.000637113	-0.00117354	-0.0245059	-0.0241703	-0.0240894	-0.0351315	-0.023946	0.0205128	0.027028	0.0210554	0.0258368
DCAM_HUMAN	-0.00625787	-0.00119521	0.0240005	-0.00902962	-0.0142871	-0.0112526	-0.00987245	0.0399021	-0.0138226	-0.0108001	-0.00707345
TPM3_HUMAN	-0.0014299	-0.00120412	0.00938831	0.0213086	-0.009911	-0.00940011	0.00649498	0.00659424	-0.0124937	0.0199319	0.0339526
MGP_MOUSE	-0.0185468	-0.00120478	-0.0255753	0.0159382	0.0949462	0.0430884	0.00797542	-0.142263	-0.0481569	0.0726226	-0.00807658
CPEB4_HUMAN	-0.0198739	-0.00126552	-0.0111871	0.0112712	-0.0113231	0.00944977	0.00402198	-0.00293908	-0.0186076	0.0106722	-0.00242263
CDCA2_HUMAN	-0.00111004	-0.00127006	-0.00706645	-0.0104874	0.00664349	0.00131058	0.0126984	0.018493	0.0245954	-0.0237743	-0.000164092
LIN1_NYCCO	0.0379865	-0.00127599	-0.021038	0.0264553	0.00691732	-0.0384864	-0.014424	0.00874511	-0.0116933	0.00322111	0.00704966
HBAP1_BOVIN	-0.00620627	-0.00129424	-0.0224505	0.0152633	-0.00847868	0.015879	0.00450085	0.00988904	-0.00374548	0.0227338	9.66088e-05
SPB3_HUMAN	-0.0501494	-0.0013136	-0.0953661	-0.0761858	-0.0324732	-0.0246443	-0.0258607	0.00480583	-0.00945052	0.00986585	0.00995543
LORF1_HUMAN	0.0295303	-0.00132336	0.00556131	0.0165962	0.00113916	0.00421891	0.0133562	-0.0105011	-0.0135237	-0.018448	0.00123537
ARMC8_BOVIN	-0.00536492	-0.00134275	0.019115	-0.00222411	0.00668322	0.0097398	-0.00696037	0.0123821	0.015464	0.00414277	-0.00590431
FRMD8_HUMAN	-0.00743328	-0.00135752	-0.0317636	-0.0164026	0.00689497	-0.0121693	0.00314858	0.0252308	-0.00341189	-0.0214702	0.00141694
FEM1B_RAT	0.057483	-0.0013595	-0.0265818	0.00637928	-0.0223644	0.0278121	-0.034686	0.0241156	0.0106399	-0.0145921	0.0127527
NOB1_BOVIN	0.0494882	-0.00137813	0.0232736	0.0179698	-0.00666763	0.0284257	-0.0256213	0.00806771	0.0268177	-0.0482682	0.00832995
SMCA2_HUMAN	-0.00248141	-0.00139664	0.00913131	-0.00122406	0.00240139	-0.00787523	-0.0224761	-0.0023645	0.0130661	0.00338955	-0.0101805
TB22A_MACFA	0.0519481	-0.00140879	0.0182138	0.00299756	-0.076367	0.0109361	-0.0441023	0.00967105	-0.0544119	0.000198618	0.00347187
ZN579_MOUSE	0.0215288	-0.00143523	-0.00133931	0.00594838	0.00468073	0.0139695	-0.00625872	0.00427917	0.0101177	0.00691771	-0.00183985
TMM68_MOUSE	-0.00382849	-0.00144016	0.0110598	-0.0142541	0.00361047	-0.0123085	0.0107294	0.0080473	-0.00188012	0.00531424	-0.00524873
PG12A_HUMAN	-0.00749627	-0.00147653	-0.0189643	-0.0106196	-0.00152902	0.0196899	-0.00323132	-0.0366249	0.022395	0.0212079	0.0325997
SPR1A_MOUSE	-0.0956133	-0.00152381	-0.125295	-0.069325	-0.101169	-0.0111919	-0.0575684	0.0414576	0.0196769	-0.0131143	-0.0130621
DDX5_HUMAN	0.00542604	-0.00156475	-0.011333	-0.0367203	0.0247255	-0.0615569	0.0061074	-0.0100084	0.0109868	-0.00324242	-0.0407909
MGT5B_HUMAN	-0.00411955	-0.00156579	0.00493084	0.0134238	0.00348027	-0.0023609	0.0146788	0.00358135	-0.00263546	0.0189376	-0.00445233
PKN2_HUMAN	0.00436829	-0.00157999	-0.0247065	-0.00119223	0.0188161	0.0142511	0.0411768	-0.00615523	-0.015107	-0.00156163	-0.00560236
LRRN1_BOVIN	-0.00533257	-0.00163034	0.00382288	0.00546794	0.0111514	0.00361281	0.000512833	-0.0195827	-0.00229762	0.00920868	-0.0188707
KSR1_HUMAN	-0.00499458	-0.00163831	0.0030496	-0.00301196	0.00574376	-0.023807	4.73098e-05	-0.00348063	-0.0160004	-0.0398189	0.00107561
TET2_HUMAN	-0.00363005	-0.00168121	0.00427444	0.00453558	0.00318727	-0.0178453	-0.00984414	0.00442798	-0.0276134	-0.0051228	-0.00014386
CI152_HUMAN	-0.0037675	-0.00169665	0.00979197	0.00121557	-0.00534273	-0.00317371	-0.00430767	0.00900159	0.00348065	-0.0122399	-0.0112783
RL17_RAT	0.0294383	-0.0017569	0.00305336	-0.000357031	-0.00467819	-0.0150515	0.00719036	-0.00619332	-0.0160357	-0.0138928	0.00232821
KIFC3_HUMAN	-0.00877826	-0.0017741	-0.00796192	0.00181794	-0.00244484	0.025301	0.0119019	-0.00463549	-0.0145735	-0.0105293	-0.000344529
ZDH16_HUMAN	0.0460628	-0.00178605	0.0240398	-0.0215302	-0.0629705	-0.0246622	0.0062906	-0.013349	0.022316	-0.0106191	0.0225195
PRS8_RAT	0.0187591	-0.00179432	-0.00200584	0.0068229	0.000162096	0.00119129	-4.46064e-05	-0.00319858	-0.00198169	-0.0011932	0.00216887
DSG2_HUMAN	-0.00920487	-0.00180658	-0.0156298	0.00573501	-0.0127449	0.0124449	-0.000444735	-0.00399486	-0.0191688	0.00572365	0.00709423
OTOP3_MOUSE	-0.00830498	-0.00182782	0.0181478	-0.00115447	0.00136224	-0.00509159	0.000288461	0.00366159	0.00131993	-0.00529182	0.00820955
TF_BOVIN	-0.00740233	-0.00183238	-0.00618236	-0.0309579	-0.00215447	0.0135811	-0.0116466	-0.0398389	0.0184496	-0.00614109	-0.00974897
TBA4A_RAT	0.00243846	-0.00187513	0.0340717	-0.00820866	-0.0410197	0.0289468	-0.00945443	-0.00741407	0.0125323	-0.00756685	0.0830151
CD1B1_SHEEP	0.041902	-0.00188399	-0.0122049	-0.0135284	-0.0202253	0.0323051	-0.0263462	0.0191421	0.0041616	0.0115706	-0.018652
SPTSA_HUMAN	-0.00162942	-0.00190963	0.00417327	-0.0160172	-8.0236e-05	-0.00781015	-0.0186693	0.010456	-0.0348879	-0.00595182	0.0115166
COX41_BOVIN	0.0267596	-0.00192573	0.00599505	0.0180229	0.00563226	0.00913947	0.0301579	0.00782536	0.00156901	-0.0283546	-0.000341188
LORF2_HUMAN	0.025612	-0.00193175	-0.00226317	0.00965069	-0.0110116	-0.0160153	0.00253411	-0.0179924	0.0102267	0.00184019	0.00202013
HIC1_HUMAN	0.0312716	-0.00194729	-0.00899594	0.0181195	0.023896	0.00867819	0.00515382	0.0162584	0.0132129	-0.0291233	5.97506e-05
IKZF4_HUMAN	-0.00436838	-0.00195687	0.0032541	0.00927846	-0.000130676	0.00340002	-0.00906124	-0.00788645	0.00292712	-0.00938612	-0.00789393
CBX8_MOUSE	-0.00570897	-0.00196138	0.00486968	-0.0142554	-0.0120571	0.00451296	0.00136026	0.00731921	-0.0200552	-0.00238286	0.005933
OTOP3_HUMAN	-0.00570897	-0.00196138	0.00486968	-0.0142554	-0.0120571	0.00451296	0.00136026	0.00731921	-0.0200552	-0.00238286	0.005933
TNIK_MOUSE	0.0344307	-0.00201583	0.00494311	5.50595e-05	-0.0446582	-0.0555679	0.0166042	-0.0450804	-0.0085576	-0.0083939	0.00239301
RFA3_HUMAN	0.0256101	-0.00204238	-0.00236896	0.0118391	-0.00676162	-0.0287347	-0.0227553	-0.0102066	-0.00182043	0.0169046	0.000295572
BMP8B_HUMAN	-0.00553771	-0.00204283	-0.0232642	0.00640503	0.0172681	0.000904551	0.00222661	-0.00362674	-0.0241659	-0.0166355	0.00187938
NADK_MOUSE	-0.0128375	-0.00206601	0.0282517	0.0212998	-0.0176608	0.0146446	0.0151309	0.0044211	0.0207822	0.0175255	-0.0248117
DYLT1_RAT	0.0302726	-0.00207311	0.00262989	0.00435276	-0.0408748	-0.000210066	-0.0192414	-0.0228591	0.0138553	0.0375423	0.00125256
PLET1_PIG	0.00226272	-0.00209395	0.0247259	0.00958806	-0.0173106	0.0125953	0.000525062	0.0260833	0.0582559	0.0176075	-0.0485213
GTR6_HUMAN	-0.0223436	-0.0021113	-0.00355072	0.0249188	0.0165383	0.0187084	-0.00326945	-0.0630049	-0.0117623	-0.0316223	-0.00319701
ABCBA_HUMAN	0.00651914	-0.00216743	-0.0069647	-0.0320842	0.0134479	0.0123821	0.0126229	0.00519828	0.0194626	0.0133223	-0.00182592
UNG_HUMAN	0.0298414	-0.00217195	-0.00966051	-0.00741755	-0.0534675	0.0638988	0.00546926	-0.025877	0.024582	0.0118315	0.00433488
S41A1_PONAB	-0.00952814	-0.00219621	0.0427618	-1.85342e-05	0.00120869	0.00391418	0.0111208	-0.0232373	0.0107166	-0.0136655	0.0179314
EFNA1_HUMAN	0.0707549	-0.00220305	-0.033562	-0.0222393	-0.0360468	0.0338721	-0.0408957	0.00255388	0.00632904	-0.00393351	-0.00643175
T2FA_HUMAN	0.00034748	-0.00220722	0.0391383	-0.0134165	-0.0352271	-0.00127197	0.00318848	-0.00558906	0.00760005	0.0240372	0.0417395
MGST1_PIG	-0.0100178	-0.00220811	-0.0317811	-0.0145731	-0.00488854	0.0121573	0.00800519	0.0533438	0.00782375	-0.0056448	-0.00162257
RAI3_HUMAN	-0.00453306	-0.00225486	0.0238381	0.00893499	0.000737726	0.00312152	-0.0339432	0.00446199	0.0129213	0.0256018	0.00825532
5HT2B_HUMAN	0.0170049	-0.00225514	0.00238282	-0.00311373	-0.0334892	0.0400247	0.0277094	-0.0184506	0.000823282	-0.00317319	0.058405
BTBD2_HUMAN	0.0456785	-0.00226626	0.00987048	0.00466351	-0.0192811	-0.0285819	-0.0305918	-0.00796443	0.0028076	-0.00198349	-0.0170447
PARD3_HUMAN	-0.0019301	-0.00226722	-0.0478528	-0.0118864	0.0199344	0.0254142	0.00772261	-0.000287724	0.00804308	0.00196316	0.015355
VP13C_HUMAN	0.0271461	-0.00228128	0.000729546	-0.000156738	-0.00543973	-0.0409731	-0.0315367	-0.016083	-0.00215719	0.0172548	0.00810642
IRF8_HUMAN	-0.00626471	-0.00230712	0.0112545	-0.0134016	-0.0201251	0.00376799	0.0112776	-0.00831493	-0.00365021	-0.0200718	0.00127178
RCN2_RAT	-0.00114071	-0.0023479	0.013645	-0.0198828	-0.011191	-0.0290226	0.0175371	0.0302847	0.00166579	0.0308763	0.00912529
MATK_HUMAN	0.0156408	-0.00236634	-0.00298098	0.0082025	-0.00596028	-0.0159869	0.00834077	-0.013352	-0.0183815	-0.0121772	0.0095336
PKHA6_MOUSE	-0.0091126	-0.00238819	-0.00382981	-0.00603473	0.0245677	0.00528253	-0.00455216	0.0136922	0.0082164	-0.00755219	-0.00173749
CPNE5_HUMAN	-0.00171577	-0.0023892	0.0240268	-0.0141945	-0.00558352	-0.0105858	0.00991799	0.0403242	0.0362153	0.023885	0.00156624
CD9_RAT	0.0228494	-0.00240283	-0.000107846	0.00449331	0.00934391	0.0360956	-0.0324633	0.0246426	-0.0154771	0.0243821	0.000627158
TSR1_HUMAN	-0.00756627	-0.00243559	0.0422478	0.000818287	-0.0234345	-0.0262407	0.0192818	0.00588805	-0.00757969	0.00725702	0.00237335
ARI5B_HUMAN	0.0673151	-0.00246157	-0.0309488	0.00569248	0.0184761	-0.00689415	0.0194635	-0.00319858	-0.0788691	-0.0278644	-0.0040036
GPR84_BOVIN	-0.0180518	-0.00246461	0.00624965	0.0314052	-0.017563	-0.00225445	-0.00955365	0.0185568	0.010909	-0.0219204	0.00238142
KAT1_RAT	-0.00366724	-0.00249155	0.0115233	0.0108709	0.0115132	-0.0659609	-0.0393301	-0.0013435	-0.00543388	-0.00710358	0.000691533
ERF_MOUSE	0.00125447	-0.00250885	0.0642123	-0.0479013	-0.00940764	-0.0305985	0.0369053	0.0242383	0.0379211	-0.0838452	-0.0155838
CITE2_HUMAN	0.0585357	-0.00253876	-0.0148124	0.0090347	-0.0227962	-0.00714945	0.00231515	-0.00138947	0.0455237	-0.0120553	-0.00712872
CCNE2_BOVIN	-0.00723007	-0.00254541	0.0284146	-0.0353287	-0.0122101	0.0124148	0.00310506	0.00242837	0.0100957	-0.0189977	-0.000375776
MFAP3_PONAB	-0.00706193	-0.00254987	0.0223123	-0.00638686	0.018265	0.0173317	0.00437848	0.0349882	-0.00444792	0.00780051	-0.00297898
ABCF1_PIG	-0.0141505	-0.00257949	0.0114145	0.0021401	0.00303773	-0.0111049	-0.00584625	0.0266902	-0.0158256	-0.0490617	-0.00740161
AEN_PONAB	-0.0100163	-0.00259899	0.00520529	0.019309	0.0167237	-0.0171331	-0.0160386	0.0133333	0.00174297	-0.00670377	-0.0121849
PTBP3_HUMAN	0.00590736	-0.0026565	-0.0395107	-0.00981483	0.0361622	-0.00258276	-0.00540107	0.0345745	-0.0190822	-0.00159136	-0.0183408
TNIP1_HUMAN	0.00227477	-0.00266346	-0.0616562	0.0122208	-0.000115853	0.00260819	0.0214547	-0.0197274	0.00471153	-0.00534513	-0.00699798
VPS4B_BOVIN	0.000390087	-0.00267559	-0.0282102	0.00748402	0.0326331	-0.00921974	-0.0129944	-0.00663728	0.0196772	0.0207416	-0.0347523
KDEL2_HUMAN	-0.010832	-0.00273287	0.0282677	-0.0177922	-0.00312854	0.0204069	-0.0405682	-0.0288184	-0.00995082	0.0364931	-0.0169262
HEM1_MOUSE	-0.0140264	-0.00277338	-0.0422937	-0.000197254	0.0244453	0.032713	-0.0184098	-0.0315973	0.0393824	-0.0183191	-0.00667607
SNAPN_RAT	0.0407731	-0.00280292	0.0130959	-0.00404214	-0.0476228	-0.0142237	-0.0103647	-0.0241516	0.030909	0.0292694	-0.00811795
NFKB1_CANFA	-0.00443727	-0.00280483	-0.000916845	0.0198362	-0.0252358	0.00117851	0.000423903	0.00381954	0.0126822	0.00112636	-0.00632037
PAR3_BOVIN	-0.0167271	-0.00288235	0.0376704	0.0153289	0.0166632	0.029603	0.0247887	0.00186837	0.00522875	-0.034189	-0.0187046
CLCN3_RABIT	-0.00454922	-0.00298397	-0.0221854	-0.0116966	-0.0127851	-0.0246731	-0.0055626	0.0140007	0.00389852	0.00923817	0.0102378
NALD2_HUMAN	0.0281162	-0.00300475	-0.00703004	0.0148213	0.0211834	-0.00716692	0.0220379	-0.00365991	-0.00281763	-0.0319786	0.00183053
GP157_HUMAN	-0.0179912	-0.00300934	0.0101573	-0.0113373	0.0471219	-0.0226474	-0.0480495	-0.0308321	0.0093678	-0.0157767	0.0204632
RNH1_RAT	0.0410598	-0.00302577	-0.0156563	0.0221546	-0.00531529	0.0283207	0.00526854	0.039048	0.00444722	-0.00744856	-0.00603663
IP6K2_HUMAN	0.0710681	-0.00302588	-0.0205653	0.0485152	0.0561038	-0.0497245	-0.0309962	-0.000531676	0.053908	0.032118	0.00047182
ZBTB1_HUMAN	0.00427832	-0.00304143	-0.00409077	-0.0123414	-0.018735	-0.0148478	0.0179714	-0.00538247	-0.0139734	-0.0164073	0.00868791
ACTN4_BOVIN	0.0247983	-0.00305029	-0.0015309	0.00871412	-0.0127258	-0.00535005	-0.0126052	-0.00804348	-0.020695	0.00971999	0.0016642
TPRG1_HUMAN	-0.00377209	-0.0030948	-0.0186185	0.0121461	0.00940698	-0.00895802	0.0360271	-0.000516642	0.005697	-0.00347523	0.00189301
EXOS6_MOUSE	0.0401028	-0.00311455	-0.00825558	0.0172896	-0.0181574	0.0115413	-0.0290088	-0.00435378	-0.00715421	-0.0229592	-0.00628358
RFX2_BOVIN	-0.00627388	-0.00314627	0.0114251	-0.0115152	0.0172769	0.00451765	0.011564	0.0257316	-0.0171203	0.00390802	-0.0218336
FRAT2_HUMAN	0.0768258	-0.00315186	-0.0275535	0.0238228	-0.0353402	0.00619889	-0.0321947	-0.00198757	0.0173859	-0.00102412	0.0262224
FNIP1_HUMAN	0.00899598	-0.00315683	0.0272579	-0.0299075	0.00777917	-0.0039952	0.0374218	-0.00632863	0.0155057	-0.00475146	0.0059842
DJB13_HUMAN	-0.00978144	-0.00315767	-0.0277923	-0.00245651	0.0587534	-0.0138346	0.0721168	-0.00923182	-0.00168622	0.0338952	0.010876
COX2_FELCA	0.0654913	-0.0031718	0.00208109	0.0215707	-0.00455587	0.065128	-0.0657309	-0.0425195	-0.118859	-0.0403751	0.000224647
MTHR_BOVIN	-0.00527663	-0.00318126	-0.027248	-0.016233	-0.0169013	0.00282164	-0.00166153	-0.0140171	0.00858778	0.0252797	0.00540124
ZBT8B_HUMAN	-0.00352672	-0.00328525	0.0217087	-0.0222134	-0.000336619	-0.0108521	0.00232902	0.0144912	0.000831874	-0.00903599	0.0148126
KDM6B_MOUSE	-0.00356086	-0.00333914	0.0137668	-0.00854794	0.00955641	-0.0245124	0.0287864	0.0059385	0.0130654	-0.0522511	-0.00563783
F16P1_PIG	-0.0135157	-0.00335246	-0.00379765	0.0380916	-0.0192121	-0.0152173	-0.0481763	0.0270341	0.000913554	-0.0201883	0.000216914
E2F4_HUMAN	-0.0101765	-0.00336192	-0.00781246	0.0315479	0.0209008	0.0126234	0.0314951	-0.0015454	0.0133016	0.0177293	-0.00920304
K1C23_HUMAN	-0.0118901	-0.00336981	-0.0332912	-0.02757	-0.00767694	-0.00983871	0.0111733	0.0191621	0.00224995	0.0130573	-0.000940038
G6PI_BOVIN	0.0206983	-0.0034375	0.00803171	0.0103002	0.0164912	0.0153903	-0.0122686	0.0257898	0.0161895	-0.0136714	-0.00128969
FKBP5_PONAB	-0.030284	-0.00349697	0.0788944	-0.046766	-0.00215233	-0.0196747	-0.040775	0.0072434	0.0137351	-0.0816439	0.00973775
VATH_MOUSE	0.01824	-0.00355355	-0.00235665	0.00745583	-0.0152038	-0.00618861	0.00834755	-0.0145048	-0.0375571	-0.0113445	-0.00253649
PLK3_HUMAN	-0.00943752	-0.00356645	-0.00719189	-0.00401103	0.0245326	-0.0206052	0.041854	0.0454808	-0.0266593	-0.00778795	-0.0354163
GSK3A_HUMAN	0.00295547	-0.00359357	0.00728347	0.0147906	0.009549	0.00854819	0.0138417	-0.0372494	0.00590173	0.0108865	-0.00841992
ARG33_MOUSE	0.0276049	-0.00359467	-0.00412546	0.0104014	-0.000632329	0.00622471	0.0186501	-0.00925908	-0.016001	-0.020206	5.56012e-05
GROA_BOVIN	-0.0296697	-0.00360345	-0.145631	-0.00437334	-0.0377872	-0.0749361	0.0244622	-0.0858226	0.00646675	0.0229115	0.0346651
MCU_HUMAN	-0.00238574	-0.00368132	0.0139687	0.00397365	-0.00664954	0.0148081	0.00568881	0.00533573	-0.00196846	0.0665739	0.010191
THOC4_BOVIN	-0.00937178	-0.00369508	0.00502724	-0.0223748	-0.0369002	-0.0233723	0.0513081	0.0551675	0.00992855	-0.00889085	-0.0413003
PCD20_HUMAN	0.0250517	-0.00370869	-0.00260783	0.0102934	-0.0268869	-0.0239041	0.0111381	-0.0297847	-0.0257359	-0.00843136	0.00148821
DJC12_BOVIN	-0.00625443	-0.00372244	-0.00700267	0.0369075	-0.0417276	-0.0453932	-0.00994527	0.0100022	0.00253217	0.0213526	-0.00867589
ANR37_BOVIN	0.0486563	-0.00375334	-0.0125878	0.0266423	0.0468801	0.0798475	-0.0109062	0.0429782	0.051271	0.0318232	-0.00928865
SRTD3_HUMAN	-0.00220649	-0.00375957	0.073899	-0.0756748	-0.0112519	-0.0120476	0.00898747	0.0559714	-0.0212849	-0.0152456	0.00141318
KCJ15_RAT	-0.00985084	-0.0037813	0.00222862	0.000438551	-0.00821468	0.0126132	-0.0100562	-0.0125015	-0.0178785	-0.00808028	-0.00216253
TMM88_HUMAN	-0.00204673	-0.00378238	-0.000335818	-0.0140766	-0.023135	-0.0132243	0.024963	-0.0133685	0.0321693	-0.0351691	-0.0181686
TBB6_BOVIN	-0.023922	-0.00381193	0.0252196	-0.00236799	-0.0074365	-0.0162888	0.00488658	-0.0214526	0.00643324	-0.00673623	-0.0410098
ACBD5_HUMAN	0.00374492	-0.00388291	0.0120089	0.00599559	0.00716777	0.00864083	-0.016719	0.000653634	-0.0114287	0.00239503	-0.0183455
CAN12_MOUSE	0.0332879	-0.00389409	-0.0107182	0.00464129	0.00598491	-0.0249002	-0.0182811	0.0149006	0.0180609	-0.00515043	0.000877521
NF2L3_HUMAN	0.0192046	-0.00389788	-0.00619786	0.00669039	0.0213921	-0.00137759	-0.0140921	0.00241081	-0.0181881	-0.00612753	0.00468637
DX39A_MOUSE	-0.0129059	-0.00392143	-0.0234622	-0.00201142	-0.00624747	0.0355863	0.0248765	0.0524442	0.00330034	0.0384823	0.0423108
RASFA_HUMAN	0.0328115	-0.00400896	-0.0202895	0.0124156	0.0113783	0.00660464	-0.00509272	-0.00220614	-0.0245508	-0.0287981	0.00774993
UCK1_BOVIN	0.0597585	-0.0040357	0.00435648	0.0208839	-0.0301587	-0.0355596	0.00832476	0.0180794	-0.0103551	-0.0191831	0.0487555
PRSR1_HUMAN	0.0358109	-0.00407331	-0.00687559	0.0134428	0.0103673	0.00116065	0.017171	0.00149216	0.0277814	-0.00137794	0.00579372
SDF1_FELCA	-0.00537669	-0.00409004	-0.00723243	-0.0038607	0.0419943	0.0396651	-0.0213294	-0.0154123	-0.0269999	0.0159818	0.017288
H2A2C_MOUSE	-0.000225054	-0.00415118	-0.0226989	0.00733697	-0.043816	0.00804948	-0.000385532	0.0346714	0.0637404	0.0320362	-0.0889546
AN33B_MOUSE	-0.00563303	-0.00423131	-0.0116821	-0.00624767	0.0289512	0.00284092	-0.017227	-0.039135	-0.00497473	-0.0214477	0.000106282
DTX4_HUMAN	-0.00655398	-0.00428107	0.0140322	0.0101749	-0.0034728	-0.0045236	0.0035504	0.0111029	0.0025554	-0.00228304	0.00254909
F1711_HUMAN	-0.00108246	-0.00428426	-0.0209586	-0.00910399	0.00978634	-0.00978789	-0.00967097	-0.0200225	-0.0172891	0.00188149	-0.00456491
GDAP2_HUMAN	0.00297118	-0.00429245	0.0170782	-0.0328122	-0.0139433	-0.0194271	0.00351428	0.0423622	-0.00561303	0.0185635	0.00906055
ARHG3_MACFA	-0.0071045	-0.0042927	-0.0349832	-0.00439398	-0.0352518	0.0319474	-0.0612954	0.0188123	-0.0123862	-0.00335848	-0.0183253
HDGR3_HUMAN	0.00222586	-0.00430132	-0.0158756	-0.0291055	-0.00926964	-0.0165014	0.0596003	0.0170455	0.00173026	-0.00371183	-0.0011746
ACINU_HUMAN	-0.00857097	-0.00439752	0.0292151	-0.0131271	-0.005718	-0.0125121	-0.0121407	-0.021896	-0.00350385	0.059267	-0.00267038
CLN8_HUMAN	-0.00172955	-0.00444405	0.0695853	-0.00308166	-0.0235233	0.000119046	-0.00462442	-0.0104805	0.0152717	-0.0300783	-0.038202
SPF27_MOUSE	0.0599356	-0.00444631	-0.016645	0.0441187	0.0166225	-0.157019	0.00776617	-0.0573638	0.0285782	-0.034026	0.00589403
CYTA_FELCA	-0.0399633	-0.00445342	-0.0661194	0.0206517	-0.0223737	-0.0174186	0.160089	-0.0351089	0.0193919	0.0165652	-0.0112592
APBB3_HUMAN	0.0358304	-0.00447794	0.00602856	0.0139562	0.0338317	-0.000604927	-0.00763419	0.00510625	0.00170326	0.00735126	-0.00201093
LEG3_CANFA	0.0537346	-0.00452773	0.00897788	0.0273349	-0.00760795	-0.00481162	-0.0237784	0.00553302	-0.0136249	0.0151664	0.0148168
RL18A_HUMAN	0.0495359	-0.00454225	-0.0121476	-0.00461568	0.00549434	0.0302267	0.0267721	-0.0390554	-0.0198929	-0.0180176	-0.00513268
P63_HUMAN	-0.0238257	-0.00455858	-0.019631	0.0145213	0.0180479	-0.00348675	-0.00511653	-0.00837289	0.0338233	0.0573807	0.0299164
THIO_BOVIN	0.0641182	-0.00456148	-0.00908983	-0.0366452	-0.0513237	0.0273146	0.016902	-0.00702036	0.0398374	0.0105692	-0.0202414
MFSD8_HUMAN	-0.00109549	-0.0045733	-0.000431347	0.00974315	0.0100913	-0.0277004	0.0112941	-0.0149872	0.00635424	-0.0042841	0.00119991
K1C19_RAT	-0.00805649	-0.0045791	0.0187884	0.0166015	-0.043657	-0.0434862	0.0216672	-0.0556466	0.0167933	0.0198395	0.0358079
F10C1_HUMAN	-0.00168886	-0.00464115	-0.036518	-0.00570696	0.0296952	-0.0232107	0.0302497	0.0226776	0.00903182	0.00897832	-0.00662793
SCND3_HUMAN	-0.0103375	-0.00465822	0.00713774	0.0166188	0.00810991	-0.0302633	-0.0333067	0.0179839	0.0137928	0.000531831	-1.68733e-05
HEAT1_HUMAN	-0.00650236	-0.00465856	-0.000554362	-0.00823862	-0.00304772	-0.00221184	-0.00724906	0.00196937	0.00415371	-0.0111731	-0.00868699
NELFA_MOUSE	-0.00171462	-0.00467913	-0.0102186	0.00997324	0.00554451	-0.0214169	0.0279286	-0.0207453	0.020284	-0.0130129	-0.0171625
ABCD4_HUMAN	0.0301315	-0.00468987	0.00882959	0.0135421	0.00262423	-0.0264755	0.0125949	-0.0067412	0.022822	0.00802509	0.0010363
SMTL2_HUMAN	-0.0115553	-0.00469551	-0.0179656	0.033241	0.0313855	0.0249045	0.00872306	0.0381685	0.0242551	0.00781392	-0.0103884
DIA1_HUMAN	0.0368146	-0.00471216	-0.00765987	-0.00284119	-0.0175721	0.0105324	-0.0278785	0.0016762	-0.0161129	0.00901894	-0.00459043
PELP1_HUMAN	-0.00129354	-0.00471434	0.0109631	-0.00244344	-0.00419073	-0.0195588	0.00126989	-0.0105894	-0.0274531	0.0323516	-0.0217666
RNF6_HUMAN	-0.00460942	-0.00472368	-0.00599528	0.00538175	-0.0116756	0.0119668	-0.00037097	-0.00264733	-0.0195617	0.00344343	0.00847025
DHX40_RAT	0.0431313	-0.00477226	-0.00665026	-0.00455948	-0.0134381	-0.0127547	-0.0236446	0.0236387	0.00424208	0.0326493	-0.0210381
NKAPL_HUMAN	0.0334144	-0.00481925	-0.00592418	0.0208214	-0.0116885	-0.0639111	-0.0268136	-0.0212929	-0.0477822	0.00553997	0.00412401
RINI_RAT	0.00416875	-0.00483817	0.0307656	-0.00195693	-0.00450651	0.0176371	-0.0299766	-0.0342687	0.0291505	0.0322561	-0.00991012
ADCY2_HUMAN	-0.0190838	-0.00484448	-0.0352894	-0.0042915	0.050545	0.0297961	0.0208275	-0.0338324	0.0303777	0.0513515	0.0103072
DESI2_PONAB	-0.00582112	-0.00486248	-0.00545575	0.0133971	0.0145287	-0.00288459	0.0313475	-0.0223337	-0.00320292	0.00146437	0.00753657
RL6_HUMAN	0.0364067	-0.00488785	0.021787	0.00209967	-0.0100811	0.0204797	0.0300561	-0.00897936	0.0119551	-0.0231799	-0.00528605
ARP3B_HUMAN	0.0611076	-0.00488883	0.0256781	-0.0388733	-0.092044	-0.00248348	-0.0198293	-0.00420735	0.0105821	0.0110719	0.0154515
CCNT2_HUMAN	0.00236637	-0.00490506	-0.0037033	0.000196791	-0.00778614	-0.0328274	0.0108525	-0.00379864	0.00688016	0.023143	0.008055
HXK3_HUMAN	-0.0109688	-0.00492421	-0.00408406	0.0140185	-0.00118896	0.00342654	-0.00800585	-0.00829536	0.00468422	-0.00565595	-0.00689135
IL1A_LAMGL	-0.00801911	-0.004957	-0.0286606	-0.0173977	-0.0031108	0.00173785	-0.0110921	-0.00718764	0.00483952	-0.00677535	0.00639891
YS027_HUMAN	0.0562406	-0.00499102	-0.000506905	-0.000410966	-0.029376	-0.0113534	0.0169153	0.0126802	-0.00829926	0.00165285	0.0184895
RB12B_HUMAN	0.00386081	-0.0050379	-0.0108221	-0.00534355	0.000767375	-0.0200173	0.0217567	-0.00468183	-0.0278098	-0.0455891	0.00947648
ACER1_HUMAN	-0.00206148	-0.00507075	-0.00426162	-0.0228105	-0.00279429	0.00589613	0.00960369	-0.00807682	0.0120844	-0.0315826	0.00906067
CTDSL_HUMAN	-0.00797177	-0.00509516	0.00183642	0.00810818	0.0271814	0.0022582	0.0152583	0.00293144	0.0255094	0.0456625	0.00557667
ABLM2_MOUSE	-0.0230148	-0.00511423	0.0157163	-0.0189445	0.00103887	0.0272544	0.00416031	-0.0168812	-0.0238818	-0.0345972	0.0248016
BGH3_PIG	-0.0114637	-0.0051736	-0.0319292	0.0181275	0.0236096	0.0270221	0.0577915	0.0294392	-0.00192266	0.0584961	-0.0215773
ROA2_BOVIN	-0.00249757	-0.00517585	0.00813148	-0.013212	-0.00198125	-0.0239834	-0.0159737	0.0356631	-0.00733119	0.0067711	0.0419831
CDC73_MOUSE	-0.00213181	-0.00521986	-0.00412552	-0.026145	-0.0249231	5.37544e-05	0.0260331	0.0297325	0.0102391	0.00249908	-0.0313638
CHAC1_HUMAN	-0.0212009	-0.0052673	0.0084727	-0.0143877	-0.0112625	-0.0330702	-0.0474784	0.00962687	0.0513028	-0.0218658	0.00371245
F212B_BOVIN	-0.00325172	-0.00529218	-0.00357808	-0.00342318	0.0149972	-0.00713946	-0.00303479	0.00867653	-0.00409615	-0.0261789	0.00607722
BOK_RAT	-0.0148783	-0.00531928	-0.0136713	0.0172166	-0.0304574	0.0075185	0.0180005	0.0206823	0.0487546	0.010841	-0.0157518
FLRT3_HUMAN	-0.0103059	-0.00532471	-0.0283759	-0.0184268	-0.00935173	0.0165979	0.0412097	0.0146256	-0.0223653	-0.0155127	-0.00417253
RN223_HUMAN	-0.0204725	-0.00534457	-0.0358077	-0.0224689	0.0173142	0.0356568	-0.0372259	-0.0583309	-0.0376248	-0.0249689	-0.0214508
CALM_XENLA	-0.019745	-0.0053541	-0.0111444	-0.0176897	-0.000555696	-0.00323294	0.00942559	0.0105115	0.0146545	0.0177255	-0.0337344
UCK2_RAT	-0.0137112	-0.00537356	-0.0478708	-0.0197736	-0.0108859	-0.00163474	-0.00562317	0.00574872	0.00701568	-0.000936986	0.00271232
PDIA6_HUMAN	-0.00111128	-0.00540656	0.0271131	0.00378282	-0.00822662	-0.0202722	-0.0490337	0.000178418	0.015057	-0.00593977	0.011124
FGD2_MOUSE	-0.0108176	-0.00541722	-0.00321155	0.0124145	0.00475508	0.00169719	0.00290881	-0.00976684	0.000893869	0.0103183	0.00275445
TAP26_BOVIN	0.0914137	-0.00542787	-0.0330506	0.0382221	0.0746284	0.111726	0.0600718	0.0578876	0.0460598	-0.10464	-0.00454392
SFPQ_MOUSE	-0.000860029	-0.00548222	0.0295572	-0.0487835	-0.0172048	0.001938	-0.0229592	0.0188524	-0.0575694	-0.0253023	-0.0146491
CMA1_PAPHA	-0.0127336	-0.00552701	-0.007023	-0.0183524	-0.0121904	0.0168688	-0.00577945	-0.0140707	-0.0337616	0.000492778	-0.00111372
FOLR2_HUMAN	-0.0180844	-0.00553001	-0.0263915	0.00899243	-0.0499083	0.0229392	-0.0406047	0.0594587	-0.0408362	0.0107208	0.0134904
ATLA3_HUMAN	0.00133474	-0.00558127	-0.00831349	-0.0123626	-0.00334979	-0.00836816	-0.00753113	0.0130278	-0.0174443	-0.000826882	-0.000216855
MMP1_HORSE	-0.0158286	-0.00559721	-0.054976	0.000770993	-0.0165841	-0.0421178	0.00117792	0.040607	0.0175254	-0.0489947	0.0089031
DMTF1_RAT	0.0118078	-0.00559913	-0.0113332	0.0169327	0.0133049	-0.00220257	0.00301771	0.000636988	-0.00598841	-0.0103924	0.00056984
TPP2_HUMAN	-0.00536303	-0.00561092	0.00336858	0.0110867	-0.00832682	0.0278992	0.0230263	0.00443089	-0.0285655	0.00101303	0.00146692
SNR27_MOUSE	-0.00288567	-0.0056202	0.0262502	-0.0132383	-0.0298571	-0.0012247	-0.0142112	0.00684563	0.00260218	0.0426678	0.0162218
AZIN1_HUMAN	0.000363856	-0.00562739	0.0123418	-0.0125398	-0.0339972	0.00717987	-0.0393142	-0.00770963	-0.0133719	0.0132482	0.0285858
CDC6_HUMAN	-0.00374191	-0.00566798	-0.00736514	-0.0126178	-0.0235876	0.00212173	-0.015894	-0.00720261	0.0137567	-0.00224829	0.00118
ENPP1_HUMAN	-0.00436781	-0.00568858	-0.00652833	0.00161075	0.0175817	0.00839563	-0.0151271	-0.0458006	-0.000418232	-0.00177753	0.00395856
NRAM2_MOUSE	-0.00949977	-0.00582662	0.036268	0.0221566	-0.00989668	-0.017245	-0.0200845	-0.0062848	0.0170435	0.0229663	0.0228399
RNF39_HUMAN	0.0325953	-0.00585273	0.00540702	0.013688	-0.0232073	-0.0407177	-0.0221071	-0.0117941	0.028021	0.00980746	-0.00175883
TAXB1_MOUSE	0.0195143	-0.00590398	-0.00509865	0.00612032	0.0137579	0.018573	0.000842251	0.0162174	-0.0316204	-0.0142827	-0.00361013
PGRP1_CAMDR	-0.0102604	-0.00592412	-0.025034	0.00502271	-0.0441148	0.0093266	-0.0131033	0.0131768	-0.00416149	0.0377591	0.0109936
COPT1_HUMAN	-0.00687215	-0.00604181	0.0597361	-0.0191684	-0.00397402	0.00898394	0.0165899	-0.0318743	-0.0156251	-0.0364001	-0.0200837
AR6P1_PONAB	-0.00690909	-0.00610822	0.0598054	-0.0131449	0.00435512	-0.00499222	0.0239366	-0.00863701	-0.00502827	0.0154615	-0.000596546
TXND5_HUMAN	0.00322464	-0.00613565	-0.00171373	-0.0110901	0.0122678	0.034728	-0.0184806	0.0024444	-0.00808724	-0.036971	0.022825
MAN1_HUMAN	0.00711973	-0.00615207	-0.00485172	-0.0089153	-0.00218026	-0.00749355	0.0387372	0.0156934	0.00887924	-0.0172307	0.00850666
MARH3_RAT	0.0118837	-0.00615951	-0.0390908	0.0141961	-0.0137222	0.0194228	-0.00454522	-0.0330638	-0.0249787	-0.00711766	-0.0255501
S43A3_HUMAN	-0.00173629	-0.00619108	0.0103881	0.0137142	0.000242354	-0.00130741	-0.00649069	-0.00580296	0.00334347	-0.0107875	-0.00266777
MICA1_HUMAN	0.0540447	-0.00622051	-0.0319715	-0.00281841	-0.00443813	0.00168423	-0.0161143	0.0106358	0.0284834	0.0375397	0.0320266
KIF1A_HUMAN	-0.00870084	-0.00622243	-0.0173732	0.0108827	0.0235926	-0.0159815	-0.0283562	-0.0325534	-0.00453554	-0.00945536	-0.00147127
CEL2A_PIG	-0.0154249	-0.00622676	0.0156119	0.0559836	-0.0131382	-0.000875023	0.00441461	0.0187569	0.00770571	-0.0025245	0.00397725
T3JAM_HUMAN	-0.00369227	-0.00623716	-0.00598671	0.0205474	0.0185261	0.0112037	-0.00773466	0.0173519	0.011358	-0.0113171	-0.00249003
CE290_HUMAN	-0.000570468	-0.0062579	-0.0283412	-0.03101	0.0117993	0.00600403	0.000414786	-0.00430731	0.00894133	0.0228737	0.00351251
MAPK3_HUMAN	-0.011323	-0.00627084	0.0102958	-0.00824707	-0.0542414	0.0187669	-0.00502391	-0.0185091	0.00559937	0.0273433	-0.0194647
ZN709_HUMAN	0.00404553	-0.00627526	-0.00479663	-0.0156166	0.0154258	-0.0121889	-0.00963655	0.0184531	-0.0137124	-0.0094082	-0.00168718
RN122_HUMAN	-0.011023	-0.00627615	0.0409619	-0.0026451	-0.00997029	-0.0397256	0.00827298	0.0218083	-0.0565712	-0.0151884	0.00499471
LNEBL_MOUSE	-0.00330632	-0.00628509	-0.00464537	-0.00949108	0.0170074	-0.0201967	0.0108972	0.0386421	0.0534754	0.0192991	-0.00531151
MED29_BOVIN	0.051211	-0.00629154	-0.0179091	0.014078	0.0022315	0.0528505	-0.00628411	0.00191895	-0.0694839	-0.00833016	-0.0111378
CD3G_HUMAN	-0.0142003	-0.00634073	0.0107856	-0.00478391	0.0082423	-0.00370874	0.00163635	-0.00861316	0.000679958	0.00402291	-0.0011698
CIR1A_HUMAN	-0.00186578	-0.00638288	0.0306906	0.00757898	0.00409724	-0.024976	0.00921247	0.0063793	-0.00185413	0.0127923	0.00880716
PROM2_HUMAN	-0.00103235	-0.00644527	0.0369303	-0.0266848	0.0103901	-0.0192115	0.00503287	-0.0443707	0.000419776	-0.0214858	-0.013309
CENPP_HUMAN	0.0346079	-0.00648254	-0.00399843	0.000663332	-0.0146109	-0.00983461	-0.0240866	-0.041681	0.011744	0.000426896	0.0046294
KAT6A_HUMAN	0.00176785	-0.00664067	0.0175087	-0.0111086	0.00458385	-0.00983053	0.00577903	0.00404641	-0.000930129	-0.000675566	0.00391887
METL9_HUMAN	-0.00936071	-0.00664532	-0.0297224	-0.0194835	-0.00844403	0.0154666	0.0307882	0.00187007	0.0254937	-0.000648675	0.0320045
CF062_PONAB	0.0220532	-0.00664892	0.00138716	0.0229899	0.00478571	0.0199577	-0.00889989	0.0131568	-0.0105058	-0.0156472	0.000479464
PPR3B_BOVIN	-0.0128021	-0.00666647	0.0316264	0.047562	0.0215051	-0.00976841	-0.0290777	-0.0217636	-0.01446	0.0230464	0.00612352
OZF_BOVIN	0.00416805	-0.00668009	0.01074	0.00481673	0.0194485	0.00684638	-0.00224407	0.018239	-0.0116451	0.0165222	-0.0135459
TYRO3_HUMAN	-0.00612981	-0.00669319	-0.010856	0.00870866	0.0284078	0.00586301	-0.0112065	-0.0236225	-0.00925914	-0.0181647	-0.0179247
DAF_HUMAN	-0.00243306	-0.00675491	-0.0284806	-0.0127817	0.00765155	0.0293605	0.0187255	0.0204448	-0.0129583	0.0136222	-0.0190887
NMT2_BOVIN	-0.00477476	-0.00682447	-0.0610255	-0.0260013	0.0511279	-0.0555992	-0.0107855	-0.0230406	-0.0144232	-0.0158788	0.0240412
GNT2C_HUMAN	-0.00827796	-0.00686559	-0.0223551	-0.00870387	-0.00351495	-0.0137974	-0.0160928	-0.0143872	-0.00350665	-0.0230298	0.0264712
HMGC2_HUMAN	-0.00714424	-0.00693235	-0.000144147	0.00333441	0.0215662	-0.00631222	0.00147306	0.00075173	-0.00594992	-0.016847	0.00258088
RABL3_BOVIN	-0.0172147	-0.00699019	0.0038577	0.0215531	0.0027953	0.021096	0.0170148	0.00769502	-0.0095776	0.046342	-0.0053983
CA226_BOVIN	0.0261932	-0.00706394	-0.0141837	0.00307773	-0.0171776	-0.0309547	-0.00609146	-0.0152791	0.0122069	0.0114491	0.001301
AT10B_HUMAN	0.00260003	-0.00713485	-0.0499949	-0.0195369	0.0110204	-0.047381	-0.0147595	0.0332082	-0.0322319	0.0433531	0.0149972
MUS81_HUMAN	0.0341059	-0.00716289	-0.00241822	0.00860466	-0.0143988	-0.0357329	-0.00367281	-0.0214831	-0.0111584	0.0373256	0.00423893
G6PC3_BOVIN	0.0381312	-0.00720511	0.00435041	0.019772	-0.0525847	-0.0143777	-0.0237946	0.00818651	-0.0395443	0.0199251	0.00221481
COG1_HUMAN	-0.000119361	-0.00720762	0.0256206	0.0203292	0.00346311	-0.0256004	0.0103827	0.00217853	0.00554352	-0.0111271	0.0015695
GINM1_HUMAN	-0.00367779	-0.0072205	-0.0105647	0.00802144	0.0413238	0.0118852	-0.0387703	-0.000187202	-0.00236121	-0.00327574	-0.00964142
CLC7A_MACMU	-0.0224134	-0.00728101	0.00967353	0.0328246	0.0200509	-0.00524322	0.0472308	0.0147557	-0.0369268	0.0412016	-0.00307476
PGBD4_HUMAN	0.0457127	-0.00730476	-0.0149508	0.0148621	0.0315543	-0.0409475	0.0245842	0.0285971	0.0141457	-0.0214815	0.000591504
SPAG4_MOUSE	0.0320034	-0.00731327	-0.00690894	-0.00911615	-0.000105129	0.0213768	0.0131247	0.0114316	0.0201316	-0.00666454	0.00625964
STAR4_HUMAN	-0.0210583	-0.00731927	0.0497631	-0.0401891	-0.00151621	-0.0125927	-0.00200179	-0.00849773	-0.00236443	0.044288	-0.00924119
RBBP7_RAT	0.0414917	-0.00736803	0.00586394	0.0109495	0.0142829	0.03584	0.0496055	-0.0133693	-0.0243112	-0.0337851	0.00221877
RHOF_MOUSE	0.0394072	-0.00737723	0.000905801	0.0147296	0.0121272	0.0161739	0.0342658	0.0054039	0.0280919	-0.0472923	0.00783412
MYH9_MOUSE	0.019146	-0.00743877	-0.0162979	0.00510596	0.0184096	-0.0202997	-0.0275275	0.0187786	-0.023098	0.00678107	0.00314499
THTPA_BOVIN	0.0563912	-0.00746572	0.0315554	0.021865	-0.0347214	-0.00603285	0.0245136	-0.040105	0.0493712	0.0286289	0.0200285
B2CL1_HUMAN	0.0235422	-0.00747815	0.0118178	0.000460422	-0.00800644	0.00780438	0.0208622	-0.00845894	0.0325206	-0.00945373	0.000911397
ENDOU_BOVIN	-0.0150236	-0.00751562	-0.0028625	-0.0312497	-0.0011913	-0.0777201	0.00392897	0.038492	-0.00510115	0.0374513	-0.00641997
NDRG1_HUMAN	-0.0239709	-0.00752621	0.0216829	-0.00546249	-0.0203054	0.0194213	0.019606	-0.00042654	0.0323431	0.0285775	-0.00133864
1C17_HUMAN	-0.00304492	-0.00754975	0.00829463	0.0201864	-0.00992681	0.014728	-0.0431955	0.0270023	0.00801504	0.00475474	0.0177075
JIP1_MOUSE	-0.000112495	-0.00761316	-0.0134804	-0.00849379	-0.00204071	0.0118062	-0.0109941	-0.04177	-0.0581319	-0.00856262	0.02173
YTDC1_HUMAN	-0.000374738	-0.00764815	-0.00141906	-0.018299	0.0122479	-0.00047521	-0.00594891	-0.00535973	-0.00515099	0.0278812	-0.0473125
IFIT3_PANTR	0.00374965	-0.00768045	-0.0164178	0.00772963	0.0288302	-0.0436641	0.0468344	-0.00667407	0.0244306	0.0140515	-0.00767537
PPCEL_MACFA	0.0211743	-0.00770472	-0.0100642	-0.0193778	-0.00312025	-0.0455879	-0.042688	0.00542189	-0.0109445	0.0233468	0.00836112
HECD4_HUMAN	-0.00728723	-0.00771219	-0.0144598	-0.01625	-2.99103e-05	0.00894219	-0.00519531	0.0198933	0.0186708	0.0108938	-0.00119529
CSTF2_BOVIN	-0.00153023	-0.00774969	0.00149637	0.0013052	0.0163667	0.01993	-0.00590605	0.00809307	-0.0135209	-0.00623554	-0.00102717
ENTP4_HUMAN	0.0307358	-0.00777836	-0.00224866	0.00810088	-0.0298716	0.00814795	0.0258466	-0.0030389	-0.00971982	-0.0103449	0.00694581
TIGAR_HUMAN	-0.000954188	-0.00779009	0.017098	0.00121221	0.00345624	0.0359342	-0.00761924	0.00866135	-0.0028009	0.0247613	0.00846988
GTR5_SHEEP	-0.00596902	-0.00800393	-0.00437091	-0.00972566	0.00138134	0.0129065	0.00518561	-0.0146862	0.0302744	0.000606456	-0.00155714
AT8B1_MOUSE	-0.0088883	-0.00800984	-0.0301637	-0.0494957	-0.015102	0.00769651	-0.00220112	0.0600101	-0.0066463	-0.00920001	0.00867659
D103A_PONPY	-0.0316773	-0.0080599	-0.107414	-0.04989	-0.0253098	0.00659826	0.0117266	-0.0431281	0.00349076	0.0555498	0.00623361
PTCA_HUMAN	0.0272406	-0.00807069	0.000405128	-0.00163517	-0.0111576	-0.0110911	-0.0187129	-0.0103747	0.0123608	0.0396233	-0.0054363
CXG3_HUMAN	-0.00826904	-0.00809685	-0.0137348	-0.00196258	0.00380726	-0.00277837	0.0126756	-2.31034e-05	-0.000701105	0.0216084	-0.00121382
TMC7_MOUSE	-0.00826904	-0.00809685	-0.0137348	-0.00196258	0.00380726	-0.00277837	0.0126756	-2.31034e-05	-0.000701105	0.0216084	-0.00121382
AMFR_HUMAN	0.0227667	-0.00813812	0.0039242	0.0173939	0.00623251	-0.0161571	-0.00391886	-0.00926293	0.049623	0.00828801	-0.00356017
GPAT3_HUMAN	0.00038506	-0.00816428	0.0114569	0.0178146	-0.00781892	-0.00564101	-0.000110524	0.0130671	0.0048137	-0.0101983	-0.0031332
FCN2_PIG	0.0554143	-0.00817604	0.00442559	0.0261083	0.026024	0.0122388	-0.0388801	0.0365934	-0.0209604	-0.00919571	-0.00611878
GLTL5_HUMAN	0.021026	-0.00818697	-0.0149305	0.00078792	0.0177524	0.0185626	-0.0215941	0.0291796	-0.0297801	0.00602953	-0.00365027
VIP2_HUMAN	-0.00791876	-0.00820223	-0.00843954	-0.0142126	-0.00530655	-0.00365374	-0.0067416	0.0057218	0.00558281	-0.0104304	-0.0118394
GRTP1_HUMAN	0.028421	-0.00825091	0.0162226	-0.00143694	-0.0448017	-0.00581521	-0.00582245	-0.0240475	0.0243558	0.0262162	0.00480953
LIPA1_HUMAN	-0.00160873	-0.00827589	0.0513653	0.0087722	-0.00840279	0.0176447	-0.003893	0.0118479	0.0272176	0.00533747	-0.00208653
FA83B_HUMAN	0.0619817	-0.00845138	0.0208113	-0.0167271	-0.0238745	0.0114866	0.00224668	0.0119171	0.0111078	0.0257018	0.0019826
IF1AX_PONAB	0.00178655	-0.00854189	0.00412846	-0.000736754	-0.00709099	-0.00410054	-0.0320039	0.0010629	0.00263647	0.0211217	0.016366
MET16_HUMAN	0.00080317	-0.00857538	0.0160722	0.00138102	-0.00383552	0.00389298	-0.00229086	-0.00571157	-0.0147784	-0.00588059	0.0033456
TBC15_HUMAN	0.0112697	-0.00859467	0.0278806	0.0212893	0.0477713	-0.0390072	-0.00346147	0.00204263	-0.0308282	-0.0319686	-0.00539802
SMG8_HUMAN	0.0193172	-0.00861968	0.00458586	0.00911908	0.00220123	0.0260929	-0.011078	-0.0109485	-0.00726657	0.0066714	-3.80293e-05
TRADD_HUMAN	0.0472595	-0.00862802	0.00390551	-0.0123377	-0.00898551	-0.00105794	0.00185247	-0.0101533	-0.0273019	-0.0313923	0.00856117
HPDL_HUMAN	0.025002	-0.00866633	0.0133022	-0.00158935	-0.0138542	0.00259942	0.0900802	-0.0378561	0.0846369	-0.0559292	-0.00557595
ZBT21_HUMAN	-0.000440691	-0.00870159	0.0232199	0.00133796	0.0150659	-0.0159398	0.0108785	0.0166684	-0.00533822	-0.0138652	0.000826885
CS057_HUMAN	0.0256165	-0.00875282	0.0158308	-0.0025494	-0.0518693	-0.00628608	0.0201482	-0.0360798	0.0200902	0.0058673	0.00234768
PA24A_BOVIN	-0.00869682	-0.00876158	-0.00251572	0.0112993	-0.000833067	0.000531312	-0.000440623	-0.00162937	0.00361107	0.00198562	-0.00220528
FA63A_RAT	-0.0115597	-0.00880597	-0.0149439	-0.00103427	0.0205131	-0.0109604	0.0157666	0.0107691	-0.00738416	0.0018666	-5.77807e-05
K1C14_HUMAN	-0.0083118	-0.00881588	0.00565673	0.0140373	-0.0387359	0.00171721	0.00519468	-0.021997	0.0363918	0.0374322	-0.0637575
CCD84_MOUSE	0.0255429	-0.00881787	-0.00212872	0.00828918	-0.0131238	-0.0237648	0.0154679	-0.000228005	-0.030644	0.0184536	-0.00218811
IGFL3_HUMAN	0.0549036	-0.00884201	0.0291399	-0.0243721	-0.147281	-0.0217169	0.113441	-0.147061	-0.0530356	-0.0421043	0.00333221
ZC12A_HUMAN	-0.0097488	-0.00884559	-0.0488805	-0.0457167	-0.0285665	0.00414873	-0.026071	-0.0249278	-0.0289882	-0.0658291	0.00141439
CPNE2_HUMAN	-0.00515412	-0.0088701	0.0256494	0.0224788	0.00747438	0.0345014	0.0309962	-0.00950619	0.0254413	0.022894	0.0208256
TRI29_HUMAN	0.0604754	-0.00887838	-0.0225407	0.00565158	-0.0080155	0.0786027	0.00642461	-0.0160888	-0.0271422	-0.0292223	-0.01511
MILK1_BOVIN	-0.0101223	-0.00894009	-0.0225472	0.0180661	0.00185775	-0.00149941	0.0144492	0.0183375	0.0185258	-0.0110881	-0.024947
RS10_HUMAN	0.035879	-0.00904152	0.00182098	0.0238514	0.0123844	-0.0246922	0.00670224	-0.016295	0.071962	-0.000211454	0.000247533
COX20_MOUSE	0.018886	-0.00909423	0.00476114	0.013051	0.00503644	0.013695	-0.0063751	0.00387965	0.0118732	0.00632394	0.000900035
1B73_HUMAN	0.0866265	-0.00916072	-0.0498949	0.0105535	0.284754	0.172658	-0.104726	0.187178	0.14864	0.0140742	0.102213
SC61G_MOUSE	0.040248	-0.009197	-0.0117604	-0.0020108	-0.0369847	0.0204015	0.059405	-0.0347474	0.057005	-0.0196368	-0.00895563
KLF16_MOUSE	0.0028086	-0.00923618	0.00556838	-0.0144239	-0.0175125	-0.0110867	0.0419336	0.00577122	0.0214337	0.00837547	0.0326676
PHF23_BOVIN	-0.00507757	-0.00926032	0.0290836	-0.042183	-0.0451719	-0.0289221	0.0273777	0.00513537	0.0718425	-0.0440826	0.0164603
EKI2_HUMAN	-0.0192571	-0.00929784	-0.00329444	0.047098	-0.0295492	0.0111897	-0.0436019	0.0268287	-0.00644224	-0.0908868	0.00336532
SCRB2_HUMAN	-0.00179348	-0.0092988	-0.0324042	-0.01275	0.0147167	0.00687289	-0.0259594	0.0223852	-0.0355011	0.0191769	-0.0178141
SQSTM_RAT	-0.00419828	-0.00935074	0.0419909	-0.00335074	-0.00750552	0.00863953	0.0129924	0.00767923	-0.000263779	0.00663277	-0.0262763
RASF3_HUMAN	-0.0046403	-0.00936645	0.0068621	-0.00534458	-0.0205436	0.0100266	0.0399474	0.0421875	-0.0435617	-0.0292589	0.0190201
ARGAL_PONAB	0.000565875	-0.00937378	-0.0187465	0.0152742	0.0123994	-0.0310103	0.00335335	0.00625816	-0.0271004	0.0196384	-0.00800938
CDN2B_BOVIN	-0.0200152	-0.00938551	0.0157108	-0.0272475	-0.0561693	0.00862094	0.00602063	0.0517568	-0.0707806	0.0251752	-0.00754238
CAD24_MOUSE	0.0383673	-0.00938623	0.00734783	0.00138517	0.00768939	-0.00462212	0.0260313	0.000632757	0.0173269	-0.0293523	0.00934249
NUD22_BOVIN	0.0530387	-0.00939637	0.00905188	-0.011214	-0.0396836	-0.0318233	-0.0226513	-4.20657e-05	0.00503675	0.0119776	0.00970299
ENTP7_HUMAN	-0.0131188	-0.00943928	-0.00928035	-0.00421474	0.0102754	0.017331	0.0110962	0.0471258	-0.00120257	0.0203851	-0.00261771
F110C_HUMAN	0.0320849	-0.00949357	-0.00158594	-0.000978834	-0.00730303	-0.0207386	0.00463457	-0.00973148	-0.0371676	-0.0400984	0.00575707
S6A14_HUMAN	-0.0266831	-0.00949558	-0.0480134	-0.0123355	-0.00989254	-0.00692827	0.0202887	-0.0308036	-0.0282564	-0.0121059	-0.0409548
PPA5_PIG	-0.00293063	-0.00954617	-0.00291409	-0.0469961	-0.0393175	0.0190428	0.00245151	-0.00125432	0.00237585	-0.0152372	-0.0413313
MO4L2_PONAB	0.0017974	-0.00956855	0.0379102	-0.0110713	-0.00264243	0.0110851	0.00619195	0.0233032	0.0222289	0.0191359	0.0401158
ZN701_HUMAN	-0.0261218	-0.00958746	0.0331181	-0.0330802	0.00944009	0.0165363	0.0238007	0.0493271	-0.0349244	0.0275372	-0.00479518
GP157_RAT	-0.0258136	-0.00963394	-0.00378526	-0.0775773	0.109785	-0.014161	0.0183626	-0.0530106	0.0221432	-0.0556985	-0.00541789
ZCHC9_HUMAN	-0.000463917	-0.00975503	0.0317838	-0.00869015	0.0132453	-0.0107089	-0.00908902	0.0123479	-0.0210618	-0.0177643	-0.000399843
DDIT3_HUMAN	-0.0114274	-0.00976136	0.0614038	-0.0451203	-0.00970503	0.014263	0.0344713	0.0434528	-0.0649026	0.00117789	0.0425949
NID1_HUMAN	-0.00223714	-0.00981893	-0.0140229	-0.00286822	0.00686245	0.000767533	-0.0255068	0.00451348	-0.00941985	-0.000241774	0.00168895
ETV5_HUMAN	-0.00531786	-0.00987974	0.019879	-0.00311991	0.00918385	-0.00189243	0.00963196	0.0152967	0.00995348	0.0178358	-0.00120876
KPCL_HUMAN	0.00728171	-0.00996108	-0.00858505	-0.00361287	0.00902108	0.0324007	0.00973248	0.00446937	-0.0452663	-0.00577107	0.00295549
C1GLT_HUMAN	0.0183652	-0.0100166	-0.000522105	-0.00135686	-0.0309727	0.0115844	0.00996576	0.00052512	-0.0163906	-0.0183115	0.00216267
ANXA1_HUMAN	-0.0165219	-0.0100384	-0.0282705	-0.00917865	-0.0519735	0.00260701	0.0187005	0.0477202	0.0271957	0.0402758	0.0825267
CIA30_PONPY	0.0499398	-0.0100801	-0.0232633	-0.00452389	-0.00247653	-0.0525068	-0.0167983	-0.00319873	-0.00958867	-0.0167443	-0.00071878
SAC31_HUMAN	0.0542695	-0.0100824	-0.00415895	0.0168896	-0.00762629	0.00909926	0.00809713	0.00266356	-0.0500666	-0.0291219	0.0201334
CBX5_HUMAN	-0.00838227	-0.0101387	0.0238503	-0.00288301	0.00752327	-0.00610151	0.00552104	-0.000516254	0.000221121	0.00352443	-0.0041444
KKCC1_HUMAN	-0.0159695	-0.01014	-0.0147861	0.0249995	0.0305279	0.0202663	-0.023593	-0.0460366	0.037432	-0.0090311	0.0168541
NO66_HUMAN	0.0455147	-0.0101459	0.00598444	-0.00139055	-0.0310441	0.0399955	-0.0384164	-0.0146337	0.0058952	0.015551	-0.00291531
PGRP4_HUMAN	-0.0150572	-0.0102168	-0.00213754	0.0627959	-0.0115748	-0.0491955	-0.000864997	-0.0188643	0.0133186	0.0350932	0.00911901
PQLC1_RAT	-0.0132136	-0.0102293	-0.0425055	-0.0151304	0.00899327	0.0190849	-0.00885569	-0.0063931	-0.0126127	-0.0156586	-0.00775327
DAAM1_HUMAN	-0.00744773	-0.0102801	-0.00946106	0.0224245	0.00730196	-0.0254293	0.0062211	0.0507808	0.00697043	0.00110457	0.0088641
F115C_BOVIN	0.0315218	-0.0103492	-0.0080406	0.0102244	0.00829669	0.0106679	-0.0128133	0.00198162	0.0171988	0.0263244	0.00715504
HA1B_BOVIN	-0.0014916	-0.0103498	0.0184567	0.012027	-0.0516455	-0.0111172	-0.0155973	0.00841022	-0.0192082	0.0349077	-0.00896946
RHG25_HUMAN	-0.00902602	-0.0103873	0.0114509	0.0183235	-0.0132131	0.0262621	0.00276125	-0.012901	0.0128013	-0.00502159	-0.00200889
ZN317_HUMAN	-0.00670508	-0.010391	0.0240794	-0.00607675	0.00112609	0.00798928	0.00193445	-0.0120501	-0.0229651	0.00432804	0.0015623
FKBP5_CHLAE	-0.0183644	-0.0104136	-0.00824834	0.00699178	-0.00376148	-0.0181817	0.0599902	-0.00993028	0.0292703	-0.0175988	0.00758404
CDSN_MACMU	-0.0116661	-0.0104658	0.00751768	0.00455611	-0.00255344	-0.0171765	-0.0922867	-0.0162484	-0.0048176	-0.0291778	-0.00902512
CH60_HUMAN	0.00405859	-0.0104719	0.014719	-0.0184565	-0.020876	-0.00512816	0.00959802	0.0152126	-0.00877858	0.00250288	0.0421047
HLAE_PANTR	-0.000399245	-0.010513	-0.00796709	0.0209838	-0.0257128	0.00451331	-0.0278441	0.0184769	0.0152445	0.00488165	-0.0393334
AIMP2_HUMAN	0.0642106	-0.0105987	-0.047579	-0.0137769	-0.0691333	0.0299866	0.00797599	0.0201003	0.0130307	0.00513501	0.00329783
INT10_HUMAN	0.0318969	-0.0105994	0.0116489	0.00166346	-0.00540577	0.038162	0.00781235	0.00929419	-0.0192273	-0.00809421	0.00191401
H2AY_RAT	-0.00623471	-0.0106502	-0.00492126	-0.00379391	-0.00929843	0.00116509	-0.0113061	-0.0122896	0.0304501	0.0328111	-0.0328901
RPAB1_PONAB	-0.00608373	-0.0106842	0.0131235	-0.0252863	-0.013211	0.0220152	-0.0395844	0.0291352	0.0133669	-0.0206471	0.00635378
CP2DF_CANFA	-0.00790105	-0.0107462	0.00470929	-0.00530886	0.0044511	-0.00431091	0.00564662	-6.48518e-05	0.00101118	0.00767137	0.00382557
GP2_CANFA	-0.00750027	-0.0107624	0.0121311	0.0267208	-0.00313355	-0.000459944	0.00261431	0.00576022	0.00429775	0.000733611	0.000155699
ZN420_HUMAN	-0.00598768	-0.0108442	0.0267788	-0.00708068	0.00540939	0.0106101	-0.0163229	0.00831248	-0.023611	0.0055689	-0.018897
EIF3C_MOUSE	0.0326551	-0.0108809	-0.00456596	0.00326623	0.0176006	0.0153883	0.00673573	0.00695073	-0.0304773	-0.00247947	0.00438445
ZN629_HUMAN	0.0491406	-0.0108838	0.0243789	0.0141279	0.00417868	-0.00458486	0.0205263	-0.0249144	0.0182393	-0.0210971	0.0199103
TOR3A_HUMAN	0.0568236	-0.0109503	-0.0213145	-0.0383644	-0.00505555	0.00937417	-0.00387025	0.0108198	0.0210259	0.00218664	0.0291257
AAPK1_HUMAN	-0.00184256	-0.0109723	0.0389832	-0.0259281	-0.00440735	0.00182846	0.00875929	0.0202716	-0.00956528	-0.0322283	0.00138738
ERG1_HUMAN	-0.00480375	-0.0110362	0.0126758	-0.0142923	-0.00272892	0.0166033	0.0670455	0.00923145	0.00839376	-0.0447932	-0.0269234
ZN143_BOVIN	0.0032422	-0.0110442	0.00202298	0.00358348	-0.01412	0.00104428	0.00438649	0.0131907	-0.0129011	-0.00159367	0.00509267
ILF2_PONAB	-0.00466671	-0.0110549	0.0195228	-0.00923924	-0.0487997	0.0212302	0.0267703	0.0228003	0.026699	0.0134366	0.0335511
SPSB1_MOUSE	-0.0067752	-0.0110766	0.0101314	-0.00180047	0.0354506	0.0219947	-0.0247416	-0.0128747	-0.00282719	-0.0259646	0.00539188
FZD1_HUMAN	0.0628276	-0.0111031	-0.0299964	0.0129407	-0.0541987	0.0315742	-0.00045434	-0.0438696	0.0594122	-0.0126861	0.0098801
S15A1_CANFA	-0.00715892	-0.0111349	-0.00644212	0.00127647	0.0321914	-0.00345577	-0.0163922	-0.00361453	-0.0191057	0.00118105	-0.00303283
BC11A_HUMAN	-0.00327725	-0.0111496	-0.00476989	-0.000805007	-0.0023126	-0.00193628	0.000822624	0.0044175	0.00340962	0.00104524	-0.000572253
PKHG2_HUMAN	-0.00883859	-0.0111658	0.0272903	-0.035005	0.0159098	-0.0232525	-0.000544965	0.0299127	-0.00299893	-0.0422775	-0.00110605
ACSF3_BOVIN	0.0275046	-0.0111952	-0.0174084	0.0117879	-0.00542216	0.0216883	-0.0318012	0.0133485	-0.0195331	0.0288502	0.00452212
RPB3_BOVIN	0.00223589	-0.0112022	0.0073367	0.00985319	-0.00876247	0.00325962	0.0132126	0.0115281	0.00624654	-0.0188686	-0.0326029
GMIP_HUMAN	-0.00694194	-0.0112127	0.0163818	0.00508108	-0.017441	0.0278494	-0.00382142	0.0200128	-0.0193651	0.008592	0.00331563
DOCK6_HUMAN	0.0423355	-0.0112134	-0.0133581	0.00423457	-0.0110743	0.00597416	0.00391615	-0.021969	-0.0224251	-0.00918227	-0.00478176
HPS6_HUMAN	0.0499631	-0.0112136	0.00211099	0.00848403	-0.0449684	-0.0161371	-0.010111	-0.00758898	0.016857	-0.00235797	0.00461248
TPA_HUMAN	-0.0149701	-0.0112825	0.0294155	-0.0181772	0.01839	-0.0119889	-0.0110581	-0.010056	-0.0629582	-0.0196729	0.0116668
GON4L_HUMAN	0.015567	-0.011311	0.00390487	0.0146398	-0.014317	-0.00592257	0.0078356	-0.014396	-0.0344969	-0.0114545	0.00423988
CALM_MYXGL	-0.0232126	-0.0113625	-0.0323434	-0.032816	0.0314876	-0.0140148	0.02257	0.0481564	-0.0389665	0.0186946	0.00879202
UB2V1_HUMAN	-0.00320667	-0.0113626	0.019707	0.0288953	0.00230426	-0.022729	-0.0332069	0.0123103	0.0140509	0.00910998	-0.0321198
BCCIP_BOVIN	0.0135325	-0.0113977	0.0092496	0.00743738	-0.0273378	0.0261229	-0.02619	0.00148621	-0.0407691	0.0273664	-0.00114515
ILEU_BOVIN	-0.0325697	-0.0114333	0.0806688	0.0585297	-0.0989778	0.0197554	-0.0358621	-0.0229725	-0.0156822	0.0383987	-0.000556833
DTX2_HUMAN	-0.00119118	-0.0114719	0.0333106	0.0171185	-0.0342219	0.0146171	0.0130536	-0.0396406	-0.00403854	-0.0267127	0.00193128
BACH_HUMAN	0.00074548	-0.0114909	0.00485987	-0.0125402	-0.0159261	-0.0220316	0.00331542	0.00657624	0.0062839	-0.0333642	-0.0150472
LIPN_HUMAN	-0.0117173	-0.0115043	-0.0453947	-0.0198788	0.00790002	-0.0323967	-0.0103788	0.0101176	-0.00218928	0.00192012	0.00121438
ZMYM3_HUMAN	0.032165	-0.0115118	-0.0092366	0.0153974	-0.0120547	-0.00314464	-0.00596624	0.000687139	0.0175574	-0.00332069	0.00225934
S36A4_HUMAN	-0.00487621	-0.0115423	-0.040366	1.28028e-05	-0.00605271	-0.0116285	0.0237555	0.00545064	-0.00113448	-0.00113207	0.00377103
S10A3_RAT	-0.00690355	-0.0115469	0.00437802	-0.00086669	-0.00800933	-0.00501767	-0.00364713	0.0139137	0.00665369	-0.0115506	0.00227645
RL1D1_BOVIN	0.0282587	-0.0115583	-0.0110638	0.0206614	0.0281343	-0.0157199	-0.0154989	0.0213874	0.00829245	0.0220516	-0.00286128
PHYIP_PONAB	-0.0163027	-0.0116303	-0.00415709	-0.00487094	0.00709916	0.0996218	0.00381013	-0.0440751	0.00567573	0.0197252	0.0203669
IMA1_HUMAN	0.00214662	-0.0116825	0.0376386	-0.0249095	-0.0232107	-0.0232138	0.00493582	0.0157547	-0.0169144	0.00178366	0.0200866
CATS_BOVIN	-0.0156532	-0.0116883	-0.0017065	0.0233275	-0.00829942	-0.0172521	-0.018228	0.012774	-0.0183773	-0.0178284	0.00462183
ZN555_HUMAN	-0.00429999	-0.0118001	-0.0111769	-0.0179605	0.0240445	-0.00750189	-0.00063198	-0.00155567	-0.00615118	-0.0177899	-0.00715662
BRID5_HUMAN	0.0393417	-0.0118156	0.00247411	-0.00800947	-0.0534964	0.0388522	0.0413429	-0.0395336	-0.00774315	0.0104724	0.0067138
LSM5_PONAB	-0.00602332	-0.0118418	-0.0278158	0.0019214	0.0188635	-0.0264646	0.0156613	0.0177895	-0.0371264	0.0183743	-0.00322186
UB2E3_MOUSE	-0.00269522	-0.0118687	-0.0274156	-0.00124094	-0.00840108	-0.0173702	0.0168269	0.0210837	0.00822539	0.00183198	-0.0338457
EIF3I_RAT	0.0284621	-0.0118821	-0.000764679	0.00130361	-0.0133544	0.00817921	0.0112169	0.00722037	-0.0289105	0.00947826	-0.000103289
DDX6_CHICK	0.00108997	-0.0118919	0.0153704	-0.0218965	0.0166415	-0.000979346	0.00305797	0.00619905	-0.0095616	-0.00299266	-0.00852501
CFA20_MOUSE	-0.00187198	-0.0119254	-0.00425488	0.0050416	0.00743609	0.00611323	0.00300632	0.0512847	0.0197371	0.00492581	0.0177849
CB054_HUMAN	-0.019037	-0.0119342	-0.0448846	0.0119873	0.00359958	0.0270639	-0.0590788	-0.00344043	-0.0162395	-0.0331387	0.0052983
SPG7_HUMAN	0.0273907	-0.0121197	0.000201177	0.0211895	0.0120875	0.00289307	0.0210938	-0.0048744	-0.0193963	-0.0306393	-0.00136288
KPCD_CANFA	0.0457681	-0.0122173	-0.001863	0.00633154	-0.0395611	-0.0381323	0.03019	-0.0136682	0.0273557	-0.0248917	0.0215959
RHBL1_MOUSE	0.0231973	-0.0122473	0.0111923	0.0347981	-0.0202082	-0.00367272	-0.00350116	-0.0291419	0.0160096	0.0130479	0.00623472
EI2BA_BOVIN	0.00403323	-0.0122673	-0.0305813	-0.00608582	0.00256611	0.0497043	0.00461444	0.0345537	-0.000689927	-0.0263721	-0.00826382
TF2H1_HUMAN	0.00459008	-0.012369	-0.0144904	-0.0186056	0.00212457	-0.0292886	0.0412625	0.00954268	-0.0269913	0.027498	0.0114076
DET1_HUMAN	7.10735e-05	-0.0124159	-0.0064307	0.00421031	0.0255927	0.0101454	-0.0145361	-0.00254799	0.0303209	0.00267208	-0.0228614
KPB1_MOUSE	0.03942	-0.0124533	-0.00806566	-0.00349619	-0.019354	-0.00733594	0.0712251	-0.0125514	0.00667579	-0.0239549	-0.00455958
B4GT3_RAT	0.00862148	-0.0124714	0.00137534	-0.0175862	-0.00991801	-0.00261283	0.0158785	0.0152922	-0.0325831	-0.0245329	0.00853314
CCM2L_HUMAN	0.037197	-0.012477	-0.025012	-0.0182769	-0.0487853	0.0498837	0.00616526	0.0289649	-0.0564418	0.0687999	0.00738382
PITM1_HUMAN	0.0519202	-0.0124832	-0.0256408	0.0111655	-0.0266444	-0.00195678	0.00776917	0.000877169	0.0170264	-0.00636847	0.0139463
LPCT4_HUMAN	0.0303624	-0.0125782	-0.00926911	0.0149598	-0.0153463	-0.0229528	0.0225084	-0.0168939	0.00283041	-0.000151696	0.00992584
SYNCI_HUMAN	0.0246891	-0.0126094	-0.00216309	-0.00117839	0.0059253	-0.0134755	0.00189281	0.00704985	0.0178587	-0.00521227	0.00166026
ADAP1_HUMAN	0.00342258	-0.0126219	0.031383	-0.0363478	0.00673132	0.0118616	-0.00739506	0.027551	-0.0305784	-0.0277922	-0.0189115
LRP8_HUMAN	-0.0126515	-0.0127719	0.00697464	0.0470301	-0.00407062	-0.0288975	0.0206063	0.0148323	-0.00102413	0.0573674	0.00406535
PREP_HUMAN	-0.00363741	-0.0127833	-0.0254797	-0.0244918	-0.0138954	0.00135122	-0.0229991	0.00882572	-0.00241357	0.0255365	-0.00185819
F213A_HUMAN	-0.00351868	-0.0128161	-0.027989	-0.00905339	-0.0224348	-0.0390515	-0.0307272	-0.0304798	0.00644061	0.0636622	0.0196471
PROD_HUMAN	0.0518248	-0.0129214	-0.0332689	-0.019354	-0.0112783	0.017139	0.0302017	-0.0233825	-0.00813714	-0.00266893	0.00870763
DGAT2_BOVIN	-0.0310931	-0.0130168	0.00043732	0.0109368	0.00405502	0.0469074	0.0165267	0.018161	0.0161915	0.0300162	0.0216002
RRP15_HUMAN	-0.00428331	-0.0130174	-0.00641424	0.00023865	0.0121411	0.0331366	0.0352732	0.032	0.052359	-0.00671612	0.00608829
AB17B_HUMAN	0.0585678	-0.013055	-0.00961772	-0.0123905	-0.0651817	-0.00767467	-0.0115462	-0.0370738	0.0251634	-0.00272958	-0.0128528
DET1_MOUSE	-0.00969064	-0.0130873	0.00018662	0.00408705	0.0177527	0.0253932	-0.0286475	-0.0294811	0.0197722	-0.000853519	-0.00672773
DNJA4_HUMAN	-0.00632867	-0.0131337	0.00240036	-0.0175452	0.010857	-0.0278558	0.0428043	0.000254714	0.00954224	-0.0412024	-0.00648668
S18B1_HUMAN	-0.00882552	-0.0131411	-0.0340533	-0.0416955	0.000739062	-0.00272899	-0.0200529	-0.0169079	0.00721494	-0.017542	0.00166611
LDHA_MACFA	-0.0133631	-0.0132255	0.00734214	0.000244784	-0.00717383	-0.0311789	0.00454082	-0.042031	0.035852	0.0155693	0.0179303
AN32A_BOVIN	-0.00370341	-0.0132699	-0.0519127	-0.000931096	-0.0122834	0.0262439	-0.017923	0.0069728	-0.0205756	0.00688979	-0.00240984
TAF13_PONAB	0.0030864	-0.0134893	0.0228756	-0.0363211	-0.0402205	-0.0253771	0.00699072	0.049863	0.00916364	0.0240957	-0.0297363
FA5_HUMAN	-0.0101258	-0.0134953	0.000964322	0.0158914	-0.000580746	0.000580648	-0.00060395	-0.00188473	0.00485394	0.00178101	-6.98141e-05
B4GT1_HUMAN	-0.00299113	-0.0135868	0.035278	0.0173022	-0.014586	0.00322431	-0.0295683	0.00116573	-0.00572773	-0.0204122	0.00285912
KGUA_BOVIN	-0.00316006	-0.0135906	-0.0236165	0.00711732	-0.0329179	0.0151267	-0.000799912	0.00308559	-0.00680292	0.0598125	0.00137391
AMYP_HUMAN	-0.00254408	-0.0136111	0.00143362	0.0461805	0.00117273	-0.0200814	-0.00647162	0.0109807	0.00133732	-0.00591312	0.00515948
IF4A1_MACFA	-0.0113429	-0.0136483	0.0769045	-0.0247669	-0.0367913	0.000687778	0.0108571	0.0155126	0.00932813	0.0037463	-0.022188
STALP_PONAB	-0.00778168	-0.0136739	0.00507804	0.016157	0.020881	0.0133222	0.0147022	0.00084449	-0.00238164	-0.0252866	0.0017285
SHKB1_HUMAN	0.060091	-0.0136751	-0.0226902	-0.0182305	-0.0121464	-0.00415902	-0.00331186	0.063081	-0.0164477	-0.00597425	0.016944
PPE2_HUMAN	-0.00944132	-0.0137093	-0.00417505	-0.00916301	-0.00501901	-0.00363795	-0.00700388	0.00551635	0.00701996	-0.0108652	0.00837317
2ABA_PIG	0.00315549	-0.0137504	0.0203943	-0.0282512	-0.0259979	-0.0210871	-0.00266603	0.00855348	0.00201917	-0.0149977	-0.577586
ACOX2_HUMAN	-0.00674407	-0.0138185	0.00498979	-0.00933492	0.00282013	-0.00306301	-0.00251245	-0.00219964	0.00344508	-0.00291015	0.009512
S2544_PONAB	-0.00580419	-0.0138345	0.0343701	-0.00727169	0.000801622	0.0109187	0.00261757	0.0295909	0.00548406	0.0136246	0.00377801
CDK5_MOUSE	0.048433	-0.0138538	0.0144255	-0.00689799	-0.0119247	-0.0630305	-0.0130497	-0.0164091	-0.00646304	0.0173076	-0.00828275
PLLP_BOVIN	-0.0121261	-0.0138615	-0.0519909	-0.0319672	0.0528533	0.00518981	-0.00973984	-0.0025109	0.0309899	-0.0565101	0.0281419
NRAM1_HUMAN	-0.00942652	-0.0139242	-0.0249795	0.0264649	-0.00904647	0.014558	-0.00811423	-0.018864	-0.00950223	0.00268479	0.00469076
SNX7_HUMAN	-0.0219936	-0.0139443	-0.0779194	-0.0538265	0.00824635	0.00455906	-0.0150423	-0.0361705	0.00527275	0.0100787	-0.00144198
RM17_RAT	0.0271266	-0.0139471	0.0168002	0.00883611	-0.0160997	-0.00868868	0.0182502	-0.0193225	0.0422531	-0.00461282	0.00106755
SAP30_HUMAN	0.0547431	-0.0139552	-0.0276784	-0.0166251	-0.0734695	0.0337617	-0.0444446	-0.0190174	-0.034242	0.0124714	-0.0202453
TOPRS_HUMAN	0.000791383	-0.0139667	-0.00167228	-0.0153889	-0.00515771	-0.0283478	0.0173473	0.0376318	0.0163697	0.00172816	-0.00260184
PCGF3_MOUSE	0.000576042	-0.0140305	-0.00151783	-0.0408341	-0.0143876	0.00686424	-0.0187652	-0.0180283	0.00867593	0.00460671	-0.0160799
CG031_HUMAN	0.0347387	-0.0140354	0.0046611	0.020014	0.00792994	-0.0209536	0.000945612	-0.00946688	-0.0532942	-0.0107567	0.0121521
SPA6L_HUMAN	-0.0173415	-0.0140602	-0.027749	0.0100312	0.0117277	0.00860533	0.0342418	0.0379782	-0.0161605	0.0447654	-0.00158609
SYYC_MOUSE	-9.85812e-05	-0.0141354	-0.0147432	0.00658933	0.0125503	0.00599904	0.0166521	0.022305	-0.00982328	0.0208104	-0.00199054
RM12_BOVIN	0.0584023	-0.0141483	0.0171963	-0.0156341	-0.0689365	-0.0331354	0.014807	-0.0122306	0.00355922	-0.00667225	0.00300881
ARFG2_HUMAN	0.00913082	-0.014178	0.0168689	0.0215758	-0.0125318	-0.0144505	-0.0131232	-0.012627	-0.0196593	0.028457	-0.03183
MP2K1_HUMAN	0.0530355	-0.0142547	0.0143788	-0.00447844	-0.0419217	-0.0283581	0.00629092	-0.00151504	0.0405407	0.031511	-0.00139612
ST7_MOUSE	-0.00798185	-0.0142799	-0.0362602	0.0253291	0.0254562	0.013738	0.0321802	0.0172808	0.00731133	-0.0028674	-0.0191332
FA84A_HUMAN	-0.00238645	-0.0143043	-0.0509429	-0.0500933	-0.0310547	0.0548211	-0.0841428	0.00809749	0.00148898	0.0124487	-0.00944688
AIF1L_MOUSE	-0.00844601	-0.0143086	-0.00730963	-0.00244415	0.00189762	-0.00943552	-0.0166696	0.00629371	0.0183526	0.0305885	-0.00080423
ARHG3_HUMAN	-0.00408381	-0.0144045	-0.0801175	-0.0222605	-0.0327007	-0.00486133	-0.036845	0.0311473	-0.00992715	-0.0277611	0.00202622
SC5A2_RABIT	0.0429862	-0.0144268	-0.00134064	0.00240517	-0.0148305	-0.0670082	-0.0690138	-0.0595558	-0.00795255	-0.000421633	0.0084574
KCRU_HUMAN	0.0484986	-0.0144452	0.0229985	0.00754376	-0.0563833	0.00772039	-0.0561296	-0.004957	0.0520743	0.0253784	0.0192463
OCAD2_MOUSE	-0.0351198	-0.0144506	-0.0872201	-0.0487737	0.0522721	-0.0216677	-0.0599182	-0.0367026	-0.00927976	0.0360754	0.0149883
UBN1_HUMAN	0.0238469	-0.0145627	-0.00127365	0.00155303	-0.0562791	0.0504703	0.0147146	-0.0097807	-0.0331337	0.0357319	0.00377065
GRP1_HUMAN	-0.0134512	-0.0146455	-0.027353	0.0325146	0.0331477	0.0442933	0.0298726	-0.0366517	0.0131033	0.00339274	-0.0142094
TBB5_CHICK	-0.0137361	-0.0147188	0.0248189	0.00369188	0.030823	-0.00607973	0.00777406	0.0103726	0.0350672	-0.0426325	0.00463254
DMKN_BOVIN	-0.0362619	-0.0147856	0.0223058	0.00970765	-0.00726145	-0.0371425	-0.0506208	-0.0346338	0.0140022	0.0859715	-0.0285563
TCHP_PONAB	-0.0060756	-0.0148092	-0.01434	-0.0248488	0.00649061	-0.0105415	-0.000234116	-0.00766976	0.0268029	-0.00614134	-0.00454184
T2EA_HUMAN	0.000722916	-0.0148241	0.00109116	0.00675796	0.0352198	-0.0103091	-0.0127853	-0.00976124	-0.0399667	-0.0112307	0.0147155
DFFB_BOVIN	0.0366278	-0.014844	0.00538915	-0.016816	-0.0339378	0.0203712	0.0585094	-0.0167886	0.00715489	-0.0361538	0.00307407
RELB_HUMAN	-0.00600288	-0.0148957	0.020161	0.0145514	-0.0318305	-0.0391167	0.028054	-0.0192255	0.022977	0.00290278	0.0224086
IPP_HUMAN	-0.013001	-0.0149682	0.00973944	0.00641776	0.0037106	-0.00126304	-0.0032133	-0.00657836	0.0047199	-0.00212151	-0.00688447
EPGN_HUMAN	-0.0336984	-0.0149834	-0.0255618	0.0698613	0.000612022	-0.0231926	0.0578352	0.0470684	0.010773	-0.00376287	-0.00456586
UBE2T_HUMAN	0.0404932	-0.0150393	-0.00297833	0.00368379	-0.0279902	-0.0666164	-0.0306341	-0.0397004	-0.0185796	0.0180348	0.0035755
MET13_BOVIN	-0.00193287	-0.0151197	0.0476134	0.00226935	-0.0208468	0.0156171	-0.0297117	0.0352521	-0.0103346	0.025707	-0.016745
UTP6_MOUSE	-0.00327456	-0.0151369	0.0199693	0.00230564	0.013727	-0.00660873	-0.0124618	0.0131393	-0.012829	0.00887098	0.000794938
IL17C_HUMAN	-0.0235974	-0.0152173	-0.0565323	-0.0121685	0.00683333	-0.0246692	0.00752904	-0.0197459	-0.00104088	0.065716	-0.00364546
RAD51_RABIT	0.0305102	-0.0152221	0.00222764	0.00575269	0.0191885	0.0268358	-0.00311971	0.0125459	0.00184515	0.0141454	0.00112689
CC71L_HUMAN	-0.0116137	-0.0152651	0.00652813	0.00437857	0.0255081	0.00015762	0.0667966	-0.010136	-0.0469761	-0.0112575	-0.0207589
SAPL1_HUMAN	-0.0272638	-0.0153147	0.0075028	-0.0117625	-0.0169585	0.0121331	-0.0440582	-0.0182886	-0.0150825	-0.0185531	-0.00859306
CAH4_HUMAN	-0.0123045	-0.0154059	0.021405	-0.00567258	-0.0223742	0.0178228	-0.0223415	-0.00550206	-0.0289025	-0.0315993	0.00128267
IFFO1_MOUSE	-0.00192889	-0.0154373	-0.0156875	-0.00151502	0.00471983	-0.00360653	0.00872363	-0.00551503	0.000712172	0.0165483	-0.00148834
RAP1B_PONAB	0.00542928	-0.0155804	-0.0193711	-0.0224512	-0.0182476	-0.0381072	0.0329915	0.0332082	0.00742146	-0.00186315	-0.0160923
LIAS_BOVIN	0.00277291	-0.0155992	0.0306007	-0.0386283	-0.0126431	-0.0401445	-0.00638447	0.0228965	0.0264435	-0.000102298	-0.00513314
WDR33_HUMAN	0.00384459	-0.0156388	0.0131596	-0.0231438	-0.0170061	0.00639906	0.0340363	-0.000540629	-0.000136567	0.00700779	-0.0160197
MKNK1_BOVIN	0.0019165	-0.0156538	0.0102817	-0.00822416	0.0101591	-0.00560048	0.0333403	0.0170256	-0.00998664	-0.0197112	-0.0111872
PP6R1_HUMAN	-0.00195292	-0.0156839	0.0295703	0.0326081	0.00666148	-0.035971	-0.0188561	0.00361462	0.0287248	0.0175665	0.041482
PDE6A_CANFA	0.00233761	-0.0158531	-0.0142387	0.000335824	0.0316981	-0.00442966	-0.036558	0.0122435	0.015152	-0.0362971	-0.00592557
UBP15_BOVIN	-0.0128116	-0.0158597	-0.0435682	-0.027439	0.0113422	0.0447282	-0.0125519	0.00317045	0.0140884	0.00394232	0.0193894
UTP23_HUMAN	0.0640965	-0.015874	-0.0485647	-0.0140743	-0.0433733	-0.0134853	0.00467645	0.000738796	-0.0138688	-0.00501795	0.016178
TRNP1_MOUSE	0.000683726	-0.0158957	-0.0122182	0.00436957	0.00351205	-0.0483355	0.00679471	0.0382653	-0.043167	-0.0341049	-0.0154306
SCPDL_BOVIN	0.00162024	-0.0159769	-0.0405099	0.00654098	0.00828034	0.00468033	0.0609155	0.0232352	0.0188325	0.0109071	-0.000660642
NSMA2_MOUSE	-0.0122841	-0.0159882	0.0097243	-0.0364191	-0.0165436	-0.0056177	0.00441202	0.0247147	-0.0165002	-0.00697126	-0.00111163
WISP2_MOUSE	-0.0122331	-0.0159934	-0.0561257	0.0094186	0.0234343	-0.0168593	0.0152467	0.00184878	0.0194181	0.0160823	0.00323124
ZN234_HUMAN	0.00856172	-0.0159941	0.0494655	-0.0124657	0.0366423	-0.0167587	-0.0258316	-0.0157783	-0.0147627	0.0490274	0.0160567
TXNIP_PIG	0.0692975	-0.0160759	-0.00344569	-0.00367859	-0.0203485	0.032771	0.0223075	-0.0376282	0.0544756	-0.00323432	0.0332067
BBIP1_HUMAN	0.0351901	-0.0160771	-0.0172483	0.0107926	0.0094617	0.0119445	0.0153031	0.0146417	0.00125411	0.000168761	0.0037128
KLF7_HUMAN	0.00741863	-0.0161296	-0.0176354	-0.0133236	0.0153744	0.017902	0.029375	0.0330529	-0.00352516	-0.0017304	-0.0163494
GRB7_HUMAN	0.0469623	-0.016207	-0.0148537	0.0273861	0.0808888	-0.0268777	-0.0958752	0.0649946	0.0569273	0.0535586	0.00174873
ZN772_HUMAN	0.000988561	-0.016213	0.0128682	-0.00384862	0.0440195	0.0208057	0.0130422	0.00494253	0.0196337	-0.0251089	0.00618164
SP14L_HUMAN	0.0359773	-0.0162454	-0.0212808	0.0197127	0.00323554	-0.0564784	-0.00379277	-0.00524362	0.0217565	0.0220732	0.00358117
IKKE_HUMAN	-0.012293	-0.0163739	-0.0100684	0.0338067	-0.0122525	0.0104968	-0.0348602	-0.0136708	0.0069102	-0.00207314	-0.00824359
T23O_RAT	-0.00625867	-0.0165334	0.0434176	-0.0322596	0.0165369	-0.0239975	-0.00289474	0.0539301	-0.0403518	-0.043211	0.0105282
AUTS2_HUMAN	0.0472111	-0.0165463	-0.0100841	0.0245627	0.00416471	-0.00669029	0.0171047	-0.00319187	-0.0498587	-0.0617978	-0.0118067
SOX4_HUMAN	0.0393324	-0.016576	-0.012038	0.0189964	-0.0116237	0.0232972	0.00179051	0.0115928	-0.0673733	-0.0285457	0.00831479
SRP54_PONAB	-0.0033572	-0.0166332	0.00574128	-0.00739168	-0.00569163	-0.00127008	-0.00219002	0.0247605	-0.0131558	0.007443	0.0125558
DDX55_MOUSE	0.0518308	-0.0166513	-0.0214626	0.0190032	-0.00248515	-0.00600214	0.0123581	0.00942829	-0.0308074	0.0123429	-0.0197685
IF2P_PONAB	0.0662157	-0.0166683	-0.0422384	-0.0092936	0.00748662	-0.0407508	0.00754137	-0.000952511	-0.00837409	0.00197316	-0.0215086
TDG_HUMAN	-0.015322	-0.0166751	0.0188865	0.000600402	0.0125198	-0.00772723	0.0160932	-0.00307357	-0.000852546	0.0215207	-0.00495375
F173A_MOUSE	0.0521134	-0.0166886	-0.00126699	-0.0196319	-0.0811765	-0.0673507	-0.0605384	-0.00814858	-0.027497	0.0481772	-0.00607721
DHPR_HUMAN	0.106187	-0.0167423	0.0152656	-0.0195664	-0.131457	0.325452	0.0406624	0.00567754	-0.0785261	0.0491398	0.00282796
S23A2_HUMAN	-0.00184439	-0.0167824	-0.00421354	-0.0104121	0.00781157	-0.00507838	-0.0177631	0.0141192	-0.00975009	0.004505	-0.00131455
PALM_HUMAN	-0.0191301	-0.0167974	-0.0266931	-0.000124793	-0.0121813	-0.0276593	0.00394245	-0.0625523	0.0211036	-0.0183133	-0.0297238
COPZ1_PONAB	-0.00677982	-0.0168393	0.0207229	0.0151586	-0.00584905	-0.0301454	-0.0362411	-0.0215353	-0.0229413	0.0285545	-0.0162848
RS17_BOVIN	0.043927	-0.016932	-0.0205316	0.0361357	0.00696451	-0.014711	0.0182678	-0.00914129	-0.0237789	-0.00968738	0.00586479
ASAP3_HUMAN	-0.00356119	-0.0169428	0.0125642	0.0139092	0.00597983	0.00141057	-0.0365154	-0.0343387	-0.00944614	0.0476248	-0.00831075
LICH_HUMAN	-0.0108751	-0.0170036	-0.020738	-0.0161692	0.0256272	-0.0117788	-0.00657435	0.0164024	-0.0174936	0.00886691	-0.00328524
RAB30_MOUSE	-0.0194592	-0.0170064	-0.0158649	-0.0557369	-0.0241436	-0.0285754	-0.0244079	-0.00577117	0.0013317	0.0109041	-0.0138768
ANXA3_MOUSE	-0.00903301	-0.0170205	-0.0118162	0.0307059	0.0381129	0.00911936	0.0137096	0.048338	0.0292595	0.0519539	-0.00289679
PRDM8_MOUSE	0.0415514	-0.0172002	-0.00994599	-0.000526245	0.0205586	-0.00399689	0.0239655	-0.0262534	-0.0031007	-0.0627561	-0.0116817
ZBT41_MOUSE	0.063074	-0.0172591	0.00561056	0.0698924	0.0413247	-0.0693059	0.0152392	0.0220042	-0.0732817	-0.0398003	-0.00272314
SOCS6_HUMAN	0.00164229	-0.0172853	-0.0137716	-0.0316068	0.0325282	0.0319528	-0.00105749	0.0149044	-0.0104094	-0.0217843	0.016954
BN3D2_BOVIN	-0.012501	-0.0174154	0.0118202	-0.0169967	-0.00946572	0.00268213	-0.0010743	0.00433901	-0.0165961	-0.00473913	0.000551162
RHBL4_HUMAN	-0.00584027	-0.0174273	0.0153629	0.0123772	0.00102304	-0.0097538	0.0123552	0.0101398	0.00261477	0.00864076	0.00410876
UBE2N_PONAB	1.78402e-05	-0.0175148	-0.0314897	-0.014129	-0.00862918	0.00760287	0.0123376	0.0363397	-0.00692012	0.0218187	0.0143279
CENPJ_HUMAN	-0.0112526	-0.0175701	-0.0260604	-0.0309757	-0.00249411	-0.0095884	0.00938061	0.0126044	0.0038645	0.0131579	-0.00285104
F135A_PONAB	-0.00491311	-0.017581	-0.0493862	-0.0250321	0.00809132	0.032424	0.00378981	0.00884652	0.0358901	0.0143301	0.00827396
CS052_HUMAN	0.0552732	-0.0176347	0.022675	-0.0071935	-0.0307509	0.00333817	-0.0177968	0.00948921	-0.00852609	-0.0328503	0.011292
RS7_RAT	0.0651377	-0.0177902	-0.0177641	0.00664274	0.0539614	-0.0258724	-0.00739001	0.00672554	-0.0226996	-0.0381226	0.00633625
HEBP2_HUMAN	-0.0140834	-0.0178109	-0.0217878	-0.011975	0.0343287	-0.00687352	-0.0383765	-0.00951386	-0.0244181	-0.037905	0.0214771
MO4L1_RAT	-0.00284956	-0.0178423	-0.00726167	0.00596515	-0.000809507	-0.013253	0.0553772	0.047775	0.0032274	0.0369441	-0.0268123
PSD11_RAT	0.00194583	-0.0178521	0.0396874	0.00121741	0.0100284	-0.0024214	0.0232578	0.022033	0.0100418	0.0121523	0.00626003
NUB1_HUMAN	0.0441026	-0.017877	0.0126401	0.00392412	-0.0575816	-0.0669869	-0.0248342	-0.0248435	-0.00415134	0.0551322	0.0127119
UBP15_HUMAN	-0.00173651	-0.0179042	0.0130049	-0.00293851	0.00487269	-0.018198	0.0376941	-0.00127977	0.0151155	-0.0161201	0.00889824
LORF2_MOUSE	0.0526329	-0.0179342	-0.041202	0.0126208	-0.0151506	-0.046708	0.0431426	-0.0363848	0.0681017	0.0379799	0.00855057
KMO_HUMAN	-0.00326381	-0.017974	0.00358263	0.0397321	0.0437068	-0.00340487	0.00107147	0.05982	-0.035037	-0.0203843	0.00385239
ANO7_RAT	-0.0132439	-0.0180267	-0.041348	-0.0146641	-0.0175918	-0.0026541	-0.0118981	0.0146155	0.0129385	-0.0138287	0.00549048
C2CD3_HUMAN	0.048168	-0.0180863	0.00128593	0.0213224	-0.0389741	-0.113325	-0.0191942	-0.0643826	0.0164146	0.0401973	0.00798311
SPB10_RHIFE	-0.0284859	-0.0180936	-0.0247102	0.00721551	-0.0351546	-0.00996167	0.0337283	0.00367578	-0.00761124	0.0638989	0.00485729
CLK1_MOUSE	0.0983362	-0.0181094	-0.0279162	0.00329544	0.0137383	-0.0369958	-0.00848461	-0.0167654	-0.0099937	-0.0121893	-0.0050323
CHUR_PONAB	0.0010967	-0.0181656	0.0126367	-0.0224462	0.0340422	0.0180537	-0.0126115	-0.0124905	-0.0333495	0.0123847	-0.00304279
AMPO_HUMAN	-0.00461055	-0.0181668	-0.0566122	-0.00190994	0.00765804	0.0103123	-0.00609522	0.0162336	0.00631637	-0.0351674	-0.0249528
RAB32_HUMAN	-0.0135416	-0.0181766	-0.0315722	-0.0224894	0.0324954	0.0312855	0.0555751	-0.00571346	-0.00286594	-0.0157899	0.0268081
TX1B3_HUMAN	0.000852955	-0.0181895	0.0226432	-0.0066593	-0.0245144	0.0101572	0.0044643	-0.00879853	-0.00537756	-0.00409397	-0.0314324
CE164_HUMAN	0.0337425	-0.0182447	-0.00035034	0.023378	-0.0137007	-0.0338761	-0.00622422	-0.0144174	-0.0379886	-0.00760132	0.0126501
STON1_HUMAN	0.0572793	-0.0182694	0.0223763	0.0271513	-0.0311249	0.0140255	0.0250976	-0.0332246	0.114614	0.0190059	0.0221243
MDFIC_HUMAN	-0.00239162	-0.0184012	-0.031508	0.00158688	0.0358803	-0.0145005	-0.00198323	0.0129108	-0.0099859	-0.0471535	-0.0103868
ZN132_HUMAN	-0.0104983	-0.0184202	0.00650766	-0.017331	-0.00881011	0.0129883	0.00281333	0.0283771	-0.00243034	0.015273	0.000389026
PPR35_HUMAN	0.0606849	-0.0185938	-0.0323588	0.00795891	-0.00861512	0.00944472	0.0153341	0.0240605	0.0184446	-0.00731578	-0.0202736
KFA_HUMAN	0.00225301	-0.0186935	0.0139376	-0.031218	-0.0012077	-0.00646985	-0.000861844	0.0318051	0.0157702	-0.00348591	-0.00134891
IFIT1_HUMAN	-0.0082985	-0.0187636	-0.0384419	-0.0136706	-0.0102007	0.00871018	-0.000434238	0.0376488	0.0250832	0.0188875	0.00352893
MYO9A_RAT	0.0352538	-0.0188221	-0.0180056	0.0284345	0.0372719	-0.069418	-0.0295754	0.0158121	-0.0619256	-0.0204128	-0.00454642
STON2_HUMAN	-0.0113768	-0.0188405	-0.0477593	-0.0309791	-0.0161018	-0.0237236	0.00305924	0.000600276	-0.005838	-0.013719	0.00613302
PIGR_BOVIN	-0.00496487	-0.0188884	0.014772	0.0177612	0.00109057	5.68166e-05	-0.000643105	-0.000722291	0.00481057	-0.0010997	-0.0213654
ZYX_HUMAN	-0.00257312	-0.0190281	-0.0527025	0.00815028	-0.0152417	0.000125707	0.0375297	0.0912135	0.0140883	0.00597663	-0.0125924
ZC11A_HUMAN	0.0761261	-0.019133	-0.0604138	-0.00978276	-0.0497538	-0.0342964	0.00975926	-0.00347816	0.00108543	0.0108923	-0.000127043
THIO_SHEEP	-0.00547692	-0.0191793	-0.0755369	-0.0482313	0.0346741	0.012204	-0.0213697	0.0309395	-0.00016431	0.0102009	0.0129542
CENPS_HUMAN	0.0589852	-0.0191919	-0.0262607	-0.000749148	0.0175672	0.00137004	-0.00318811	0.0180021	0.0625129	0.0275448	-0.00529158
EZH2A_XENLA	0.106625	-0.0193403	-0.0639868	0.0404485	-0.0298741	-0.0812369	-0.0359272	-0.00543596	-0.0102205	-0.0231076	-0.00102635
NMD3_HUMAN	-0.0135838	-0.0193583	-0.0101881	-0.0060248	-0.00313159	0.00319301	-0.0224585	0.0121245	-0.0217436	0.00110193	-0.000401787
ZBT43_HUMAN	-0.00270492	-0.0194059	-0.00741005	-0.0303598	-0.0207406	0.016539	0.0207091	0.0559619	-0.0297153	-0.0154774	0.000755748
VATC1_BOVIN	-0.00137959	-0.019455	0.00513235	-0.0177015	-0.0169362	0.000796189	-0.00321297	0.00910414	-0.026012	0.00808296	0.00394822
COR1C_HUMAN	-0.00405838	-0.0194878	0.0447794	0.00515574	-0.016262	-0.0252613	0.0220047	0.0284539	0.0209437	0.0232412	-0.0121584
SBNO2_BOVIN	0.000581048	-0.0195025	0.0111256	0.0362898	0.0114614	0.0128464	0.0425686	-0.00267571	-0.0211217	-0.0135472	0.00255237
RRN3_HUMAN	-0.00798312	-0.0196075	0.029897	-0.0101354	-0.00441197	-0.00165789	-0.0101542	0.00211128	-0.0154604	0.0169024	0.00536258
ABC3G_MACMU	-0.0809506	-0.0196564	0.0477303	0.0775987	-0.0979469	-0.00585126	0.0427875	-0.0135394	0.0674377	-0.197766	0.0104897
S10A7_BOVIN	-0.0231092	-0.0198895	-0.0145594	0.0268935	-0.0513458	0.0410673	0.1328	-0.0632016	-0.0489712	-0.0511229	-0.0225038
SMAP_PONAB	0.0051387	-0.0199528	-0.0172374	-0.026481	-0.0185378	0.015097	0.0182387	0.0282746	-0.0408241	0.0374233	0.0320853
CNOT2_HUMAN	-0.00315352	-0.0199596	-0.0369981	0.024554	0.0255968	0.0156625	0.017791	0.00232723	-0.00695922	0.00606905	-0.0017374
TDM1A_MOUSE	-0.0112505	-0.0199887	0.0179015	0.0262729	0.00568572	0.00666982	-0.0151824	-0.0212863	0.00740179	-0.0126766	-0.0102066
PPP6_RAT	-0.0101277	-0.0200798	0.010735	-0.0656024	-0.0406339	0.0148366	0.0602802	0.0392966	0.0644174	0.0254155	0.0113115
SMTN_HUMAN	0.0639688	-0.0201083	0.00126016	-0.005689	0.00309973	-0.00270804	-0.0148537	0.0195625	0.0621032	0.018021	-5.0118e-05
PCNA_BOVIN	-0.00143573	-0.0201505	0.0461154	-0.0443159	-0.0101588	-0.0428555	-0.0116645	0.024509	0.0403509	0.0339346	0.0276616
TIGD1_HUMAN	-0.0131188	-0.0201509	-0.0407271	-0.0227338	-0.00721569	-0.000751982	-0.0108982	-0.000895069	0.00987429	-0.00565131	0.00161968
TATD1_MOUSE	0.036628	-0.0204483	-0.00699776	0.0164938	0.00742992	-0.0250471	0.0182358	-0.0083005	0.00263936	0.00347021	0.00940386
DUSTY_HUMAN	0.00560636	-0.0206099	-0.03752	-0.0373405	0.0257289	0.0107041	-0.0132104	0.0406157	0.0246245	-0.0120393	-0.00528266
PSD12_BOVIN	0.00462425	-0.02064	0.00815043	-0.0108029	0.00840681	0.00735022	-0.0237562	-0.00932358	-0.0218421	0.010487	0.0196909
ZNF3_HUMAN	-0.0162831	-0.0210368	-0.0257532	-0.0286094	-0.015728	-0.0185669	0.0176998	0.0425242	0.00795803	0.0115654	-0.00141673
KAT3_BOVIN	-0.0153091	-0.0211015	-0.0445109	-0.0310038	-0.0355027	0.00289586	-0.00100264	-0.0383427	0.0402856	-0.0117536	0.0104411
RS14_MOUSE	0.0634838	-0.0211261	-0.00319818	0.0246125	-0.0034029	-0.0071101	-0.0110055	-0.0158095	0.00935044	-0.00663246	-0.000432447
DPTOR_HUMAN	-0.00886647	-0.0212637	0.040363	0.00862113	-0.0171193	-0.0226454	0.0208047	0.00697164	0.0474182	0.00508763	0.000609606
CAZA1_BOVIN	0.000378046	-0.0212888	0.0424635	0.00205899	-0.00131214	-0.00130785	0.0253064	0.0141047	-0.022078	0.00376892	-0.00769011
AACT_HUMAN	-0.0143678	-0.0213419	-0.0132562	-0.00991767	-0.00654652	-0.00734793	0.00249225	0.013649	0.00800541	0.00152098	-0.00509655
CYC_MINSC	-0.00225528	-0.0216333	0.00175339	-0.0281368	0.000163372	0.0117505	0.0159255	0.00753678	-0.0181416	0.0122954	0.0239082
AZIN2_HUMAN	-0.0129295	-0.0216348	-0.0642197	-0.0171643	0.0422531	-0.0238547	0.0516382	0.0158111	-0.0302578	0.0562813	-0.00510395
SPB7_HUMAN	0.000459577	-0.0216646	-0.0180132	-0.00246163	-0.0252706	-0.00062818	-0.00404274	-0.0263394	0.0415797	0.0114009	0.00505451
TLR2_HORSE	-0.00910132	-0.0218218	-0.0392583	0.0179237	-0.0502759	0.00481656	0.0029118	-0.0159618	-0.00722992	-0.0079417	0.000762881
MED25_MOUSE	0.0562352	-0.02199	0.00764409	-0.00271815	0.0131061	0.0291859	-0.014554	0.0339364	2.91952e-05	0.00922183	0.00685136
IF4E_RAT	-0.00997394	-0.0222217	0.060371	-0.0230807	-0.0245682	-0.0146341	0.00633043	0.0459137	0.0354365	0.00202896	0.000189896
MORC2_HUMAN	-0.00624422	-0.0222841	0.0251179	-0.00697032	0.0083697	-0.0122986	0.00966107	0.00282851	0.00177249	0.00545224	0.00842284
ZFYV1_HUMAN	0.0493032	-0.022377	0.0115726	0.00546888	-0.055179	-0.00159547	0.0137157	-0.0205367	-0.0161106	0.0198702	0.0132916
UBP32_HUMAN	0.000802825	-0.0226911	0.000987686	-0.0323255	-0.00749093	-0.0236834	0.012356	0.0186305	0.0248127	0.0177829	0.00356412
KAZRN_HUMAN	-0.0126238	-0.022874	-0.000829953	0.0193729	0.0486055	-0.0112065	-0.0197355	-0.00761452	-0.00995614	0.00443359	-0.00503414
P5I13_HUMAN	0.055039	-0.0229383	0.00194713	-0.0210134	-0.0700478	-0.00689515	-0.0060716	-0.0266346	-0.0292292	0.0193773	0.0164302
EMP2_PANTR	-0.00399877	-0.022955	0.0371052	-0.016849	0.00435078	0.0198551	-0.0532606	-0.0157709	0.034254	0.0079499	0.015848
DUS16_HUMAN	-0.0115444	-0.0230637	0.0167216	-0.0062376	0.000306784	-0.015081	4.3704e-05	0.00659375	0.00727753	-0.0105822	0.020925
SIGIR_HUMAN	0.0535919	-0.0231287	-0.0134266	0.0153114	0.0148828	0.0107948	-0.0151827	0.0293709	-0.0545236	-0.034077	0.0114187
S20A2_FELCA	-0.0102811	-0.0231389	-0.00791457	-0.0179077	-0.00527169	-0.0153065	0.0225635	0.0158749	-0.00250363	-0.00931013	-0.0162027
UB2D2_XENLA	-0.00270492	-0.023142	-0.015741	0.00538711	0.0166511	0.0124118	0.0424526	0.000979279	0.0258205	0.00691164	0.0297677
ZG16_HUMAN	-0.0500557	-0.0231568	0.0301477	0.150957	-0.0301746	0.00222474	0.0119296	0.0574654	-0.00823664	-0.0275146	-0.00458144
ETS1_HUMAN	-0.0151699	-0.0232356	0.00120645	0.00376137	-0.00184729	-0.0111864	-0.00901	0.0357973	-0.0161331	-0.0149518	-0.0134257
SPDEF_HUMAN	-0.00714666	-0.0232944	-0.0126084	0.00547204	-0.016672	-0.00145535	0.0102218	0.018465	-0.00908193	0.00880431	0.00178316
YG041_HUMAN	0.0433298	-0.0233906	-0.0224582	0.0118086	0.0037326	-0.0402832	0.0168915	0.00936763	-0.011049	0.00420465	-0.012384
RTP5_HUMAN	-0.00653391	-0.0234185	0.0138624	0.00486469	-0.0176427	0.0112094	0.00596836	-0.0239509	0.000380139	-0.0211947	0.00173685
REEP4_RAT	0.0650166	-0.0237406	-0.00705549	0.0224805	0.0180222	-0.0382421	-0.00433655	0.0132182	0.0334324	-0.0256665	0.00825997
SCNNA_HUMAN	-0.00784804	-0.023751	0.00670235	0.0148625	0.0433254	0.0256404	-0.0296588	-0.0317192	0.0129865	-0.0506041	-0.0216555
6PGD_HUMAN	0.060687	-0.0238325	-0.0331904	0.0016235	-0.0155401	-0.00683083	-0.0779224	0.0752684	-0.00023797	0.026094	-0.177819
GLT12_HUMAN	-0.00862992	-0.0238693	-0.00558371	0.0183086	0.0259869	0.0247761	-0.0374918	-0.0151733	0.0368254	0.00858659	0.00616658
MAP7_HUMAN	-0.00684806	-0.023902	0.00292215	0.0170007	-0.00398619	0.026815	-0.0240063	-0.0168905	-0.00948791	0.0166272	-0.0172064
IF2P_HUMAN	0.00954001	-0.0247492	-0.0721605	-0.0278858	0.00154538	-0.0175806	0.0296433	0.0394751	-0.00404514	0.0205397	-0.000453592
RSAD2_BOVIN	-0.0135523	-0.0247559	0.0533352	0.0261419	0.0530089	-0.0357675	-0.00821249	-0.00258469	-0.0126464	-0.0432272	-0.00464995
PHTF1_HUMAN	-0.0118314	-0.0250121	0.0435112	0.0210856	0.0238953	-0.0258469	-0.0044841	-0.0036214	-0.00120996	-0.0192494	-0.0199047
MT2_MACFA	0.061468	-0.0252085	-0.0122834	-0.0435573	-0.0361989	0.0346829	-0.0146852	0.0168264	0.0267826	0.0159599	-0.0343101
CCD66_HUMAN	-0.00412681	-0.025497	-0.0411478	-0.033629	0.000617541	-0.00101975	0.0147661	0.0495011	-0.0170989	0.00184859	-0.0104226
AREG_HUMAN	-0.0162225	-0.0255019	-0.0494279	-0.0266978	-0.025996	-0.00183131	0.0268375	0.0124477	-0.0649927	0.0133305	0.000300285
ZDH13_MACFA	-0.00707563	-0.0256133	-0.0126723	0.0061986	0.00917099	-0.00261502	0.0159774	0.00499867	-0.0187089	0.00934464	0.00668784
RAB8A_RAT	-0.00469074	-0.025619	0.0161772	0.0132894	-0.00406022	0.0316861	0.0150196	0.0276894	0.0153183	0.011446	-0.0411099
T2FB_HUMAN	-0.00585779	-0.0256327	-0.000188038	-0.0115517	-0.0605004	-0.00642074	0.00151193	0.0137308	0.00203433	-0.00569097	0.0235283
TSN14_MOUSE	-0.000188389	-0.0256607	0.0118362	0.000165288	-0.00612132	0.00126265	0.0347635	0.0121842	-0.0295995	-0.025427	-0.0190969
ARGI1_HUMAN	-0.00902197	-0.0257851	0.00582058	0.0102985	0.0039827	0.00125257	-0.00417089	-0.00906358	0.00647587	-0.000159656	-0.012119
COX1_HORSE	0.0631216	-0.0258716	-0.00225533	0.0124218	-0.0295583	-0.0729602	-0.00937504	-0.0374034	-0.0397881	0.0140747	0.0375771
MMGT1_PONAB	-0.0100573	-0.0259184	0.00977223	0.00816491	-0.0511402	0.0151593	0.0122336	0.00800245	0.0144425	0.0335216	0.000522898
UTP11_HUMAN	-0.00734116	-0.0260695	0.0460033	-0.0106048	-0.0244926	0.00452777	0.00313686	0.0348773	-0.0339656	0.012712	0.022151
CTRC_BOVIN	-0.0280304	-0.0261819	-0.0511905	0.0901905	-0.0219445	-0.00434515	0.013324	0.00136221	-0.00328295	-0.0280352	-0.00772576
RTCA_MOUSE	-0.0103697	-0.0262422	-0.0188933	0.029412	0.0333348	-0.00358667	-0.0221528	0.0115197	0.01615	-0.0122504	-0.00588846
TIM22_RAT	0.00263785	-0.0262707	-0.0216448	-0.0261635	0.0153459	0.0098259	0.0136362	0.00265908	0.0226267	0.0138444	-0.00785035
DDX52_HUMAN	-0.00848376	-0.0266499	0.0137185	-0.00395933	-0.0259963	0.0137178	0.0159713	-0.0139365	-0.0174053	-0.0104238	-0.00349342
EF1G_BOVIN	0.0664765	-0.0266524	-0.0470624	0.0172254	-0.0181872	-0.0289896	0.0290588	-0.0278017	-0.0652598	0.0531105	0.0250346
S38A3_MOUSE	-0.00786226	-0.0270201	-0.00528653	0.00313523	-0.00435299	-0.00334171	0.00139925	0.00863022	0.0079341	0.00187253	0.00159504
VPS41_HUMAN	-0.00524427	-0.0271043	0.0160561	0.0123844	0.0522678	0.0027604	0.0208508	-0.00171998	-0.023104	0.0106344	-0.0133297
F118B_MACFA	-0.00551931	-0.0271347	0.0569085	-0.0294797	-0.014345	0.02014	0.014021	0.0429352	0.00531077	-0.056765	0.00710733
NR1H2_BOVIN	0.0540287	-0.0276649	0.00909944	0.0351613	-0.0296842	-0.0204326	0.00482488	-0.0110697	0.00725108	0.00169919	0.0187409
SON_HUMAN	0.0571067	-0.0276706	-0.0182999	0.00166049	0.00923861	-0.0106575	-0.00511226	-0.00255847	0.00737373	-0.0163447	-0.0215664
PRS27_HUMAN	-0.029363	-0.0277472	-0.0813281	-0.115484	-0.023991	-0.0362136	-0.0513095	0.0220028	-0.00141413	-0.063507	0.00909632
ANGL3_HUMAN	-0.00782663	-0.0281499	0.00672039	0.01357	-0.00180599	-0.00187059	0.000401589	0.00452285	0.00778196	0.000345035	-0.00128759
SERA_HUMAN	-0.0160885	-0.0281546	-0.0283518	0.00697769	0.00176793	-0.0164308	0.0122931	-0.00883534	0.00237841	-0.00497664	-0.0254951
FA98A_PONAB	-0.00821003	-0.0281739	0.0323271	-0.018917	-0.00947385	0.00177238	0.0125096	-0.0160237	-0.0143173	-0.0110353	0.00972203
TETN_BOVIN	-0.00490212	-0.0282093	-0.0200002	0.0813882	-0.0338465	0.0152463	0.0308328	0.0166075	0.0295404	0.0467059	0.0190118
GRWD1_RAT	-0.00524539	-0.0283285	0.0430632	-0.0192704	-0.00452825	0.0113444	-0.00790276	0.0107672	-0.0126819	-0.00762117	-0.00365753
PSB3_MOUSE	0.0537815	-0.0284785	0.00467836	0.0484972	0.0126209	-0.00316159	0.0532278	-0.00127377	-0.0126872	-0.0336134	-0.0318982
LAD1_HUMAN	0.058522	-0.028535	-0.015791	0.030165	0.0164408	0.0114523	0.0104541	-0.0232971	0.0204795	-0.0306401	-0.0395799
SPB8_BOVIN	-0.0320715	-0.0288257	-0.00226455	-0.00614396	-0.0356031	0.0215688	-0.00596966	-0.00922852	-0.0679746	0.0196789	0.0187331
PROSC_HUMAN	0.00359156	-0.0288519	0.0136996	-0.019403	0.0174733	-0.0121039	0.0029164	0.0130458	-0.0217137	0.00437501	-0.0137913
RHOC_PONAB	-0.000772314	-0.0290531	-0.00384889	0.0260872	0.0550943	-0.0306392	0.0896325	0.0104233	0.00180137	-0.00328941	-0.00399638
IN80B_HUMAN	0.0703244	-0.0290643	-0.0022599	-0.00547178	-0.0184067	0.00920645	0.0229591	0.0276806	-0.0113756	-0.00469338	0.0169504
RDHE2_HUMAN	-0.00594056	-0.0290674	0.0433437	-0.00771741	0.0132056	-0.0325877	0.0362878	0.00649965	-0.0117225	0.0210142	-0.00875068
COL_CANFA	-0.0327391	-0.0291462	0.0264601	0.107966	-0.0489162	0.0293139	-0.0208964	0.0138749	-0.0192473	-0.0326327	0.00343786
WWC2_HUMAN	-0.013041	-0.0292917	-0.0612017	-0.0280603	-0.0127999	-0.026807	-0.00577628	0.0281794	-0.0210286	0.00624552	0.00192482
F159A_HUMAN	0.0546771	-0.029384	-0.026372	-0.0179895	-0.0503976	0.0496082	0.00364093	-0.00751223	0.0780214	0.0212307	-0.00575747
RM24_BOVIN	0.0648504	-0.0294953	0.00887759	0.0188937	-0.064119	-0.000922823	0.0206698	-0.0132252	-0.0344357	0.00320772	-0.035255
DGAT2_MOUSE	-0.0108536	-0.0295125	0.0296062	-0.000478086	-0.00117501	0.0736948	0.0418862	0.0317031	0.07969	0.0213613	0.00288558
S27A2_HUMAN	-0.0103823	-0.0296923	-0.00268941	0.00420966	0.00168209	-0.000221578	-0.00334744	-0.00512326	0.00792011	0.00111597	0.00617485
KDSR_MOUSE	-0.0109149	-0.030149	-0.00744679	0.0253465	-0.00892515	-0.0309359	-0.024503	-0.0165175	-0.0614658	0.018489	0.0180485
GRAN_MOUSE	-0.00806076	-0.0304369	-0.03233	-0.0193979	-0.0204312	-0.0314518	-0.00559005	0.0482314	-0.017752	-0.00867809	0.00438842
MMP3_HUMAN	-0.0621072	-0.030501	-0.154778	-0.000451877	-0.0800991	-0.056537	0.0126981	0.104651	0.0484253	-0.0252973	0.00308289
NIP7_PONAB	-0.0159405	-0.0307738	0.0347954	-0.0225694	4.48559e-05	-0.00176382	0.00873876	-0.00350768	-0.0262232	0.00609613	-0.00935168
PSA3_RAT	0.00944322	-0.030886	0.00237509	-0.00966048	0.0108219	-0.00703241	-0.00403496	0.0478038	-0.0121151	0.0344279	0.0226068
ZMAT2_MOUSE	-0.0141223	-0.030933	0.0194398	-0.0150662	-0.000384682	-0.0172993	0.011734	0.00484046	-0.0173251	0.0313974	-0.016467
SHLB2_HUMAN	-0.0105939	-0.0313539	-0.00259923	0.0166191	0.0348586	-0.00424035	0.0269357	-0.0163949	0.0242732	-0.0260535	-0.035934
ABC3G_PAPAN	-0.0902877	-0.0314743	0.00896667	-0.0666418	-0.00996512	0.0543484	-0.162457	-0.0582923	0.0325617	-0.170349	-0.0142549
EST1_MACFA	-0.0201337	-0.0315589	0.0965742	-0.0573788	0.00311034	-0.0125302	-0.0473993	0.0787383	-0.0127228	0.0468438	-0.0182586
RSLBB_HUMAN	0.0587859	-0.0317997	0.00403692	-0.0351223	-0.0312133	0.051115	0.0654475	0.0067161	0.0870531	-0.0437325	0.00143351
TRXR1_HUMAN	-0.00456255	-0.0321673	-0.0515799	-0.0178581	0.0441015	-0.0098111	0.00934731	0.0519405	-0.00423793	0.000775332	0.0355761
FHR1_HUMAN	-0.0182094	-0.0325059	-0.00238739	0.0209353	0.0310594	-0.0346148	0.0227542	-0.00102979	-0.00923083	0.0487003	-0.00739951
CELF1_MOUSE	0.0664961	-0.0327032	-0.000459245	-0.00398583	-0.0362932	-0.0129595	0.0261247	0.00935478	-0.00527895	0.00771043	0.0336033
NRIP3_HUMAN	-0.0130165	-0.0327823	-0.00826659	-0.0127555	-0.0175222	-0.0249068	0.00154741	0.0581297	0.00582524	-0.00385752	0.00803688
IL6RA_PIG	-0.0208743	-0.0328253	0.0109295	-0.0111373	0.0159755	0.0210721	-0.0287037	-0.0407345	0.00341401	-0.00649884	0.00235082
LIPC_RABIT	-0.00907894	-0.0330534	0.00992017	0.0176521	-0.00167269	-0.00193452	0.000297293	0.00457375	0.00905241	0.000125895	-0.000385557
S35E4_MOUSE	0.0647618	-0.0331538	-0.0138615	-0.00258672	-0.0242758	0.0113143	0.0307864	0.00459395	0.0276926	-0.0219885	0.0171686
SORCN_PONAB	0.00189915	-0.0332668	-0.0135815	-0.0218009	-0.0147421	0.00584506	0.0277115	-0.0179889	0.00792558	0.00321057	-0.0102088
SLPI_HUMAN	-0.0114849	-0.0333509	-0.00771261	-0.0627358	-0.022237	0.028704	-0.0524793	0.069632	0.0389825	0.038918	-0.0513536
A2GL_HUMAN	-0.0245693	-0.0336841	-0.0201827	0.0282489	0.0114558	-0.0236842	-0.00593216	0.0346982	-0.0298887	-0.0446955	0.00980373
SPEB_HUMAN	-0.0116059	-0.0341975	0.000129215	0.00779233	0.00197717	-0.000190408	-0.00359239	-0.00549745	0.00906946	0.000913678	-0.00803943
BSND_HUMAN	-0.00728428	-0.0342351	0.00125847	0.000876551	-0.007135	0.0205938	0.0150123	-0.0746192	0.00961765	-0.0151394	0.00294536
RT14_BOVIN	0.0591041	-0.0342389	0.0200398	0.0108246	-0.0134789	0.0188398	-0.0332881	0.00143834	-0.0272832	0.0173485	-0.00136945
HGD_HUMAN	-0.011444	-0.0346907	0.011707	0.0176165	0.00473726	0.00140713	-0.0047639	-0.0101568	0.00872142	-0.000615378	-0.00253622
TOR2A_BOVIN	0.0471139	-0.0349635	-0.00319252	0.0245997	-0.0329652	-0.000749191	0.0249616	-0.00698575	0.00370385	-0.00937495	0.0163254
SAE1_BOVIN	-0.0126917	-0.0351942	-0.0153918	-0.00572821	-0.0327294	-0.0151468	-0.0163422	0.0569507	0.00143482	-0.008351	-0.00252173
ACDSB_HUMAN	0.0628847	-0.0353568	0.0478193	0.0380256	0.00567125	-0.0371449	-0.0445234	-0.0463458	0.0718175	0.0138849	-0.0142158
LRAD3_HUMAN	-0.0137718	-0.0354373	-0.0382952	0.00187948	0.0209383	-0.0454841	0.017421	0.0387771	-0.00707347	0.0147242	-0.00281326
NLRC3_MOUSE	0.06872	-0.0354966	-0.0133712	0.0520614	0.00855786	-0.00174357	-0.0262276	-0.00984206	0.00947067	0.00131349	-0.0177052
MON1A_MOUSE	0.0798623	-0.0355384	-0.0578562	-0.00714275	0.0327181	-0.00129055	0.0410803	0.0256808	-0.0133362	-0.0590998	-0.0135767
PLIN2_HUMAN	-0.00751729	-0.0357242	0.00190663	-0.0555124	0.00970692	0.0266743	-0.0236221	-0.0515669	-0.00985929	0.0270783	-0.0197593
CASPD_BOVIN	-0.00352109	-0.036245	0.0106038	-0.0111397	0.0286594	0.0239218	-0.0419923	0.00482117	-0.0430388	-0.00730542	0.0131253
CCL3_CANFA	-0.0191917	-0.036337	-0.0174405	-0.00682576	-0.0351656	-0.0177178	-0.0821683	0.107922	-0.027559	-0.00158325	0.00523638
DAB2_HUMAN	-0.0177474	-0.0364638	-0.0171411	0.0290373	0.050131	0.00793615	0.00620986	0.0455816	-0.0434598	0.0461823	0.00346055
PSMD6_HUMAN	0.0760038	-0.0364924	-0.0494143	0.0198977	-0.0132867	0.04519	-0.0342531	0.0140401	-0.011471	0.0135179	-0.0233575
DDIT4_BOVIN	0.0735042	-0.0366298	0.00777858	-0.0406828	-0.0877478	0.0330629	-0.018775	-0.0528123	0.043853	-0.0168236	-0.00523702
DEPP_PONAB	-0.0152594	-0.0366453	-0.00590822	0.0126382	-0.00634031	-0.000476329	-0.00908376	0.00232269	0.01374	-0.00873452	0.000665673
CBPN_MOUSE	-0.0103947	-0.0368126	0.000837975	0.011059	-0.00414418	-0.00350136	0.00121335	0.00882777	0.0104841	0.00147571	0.00334011
KMT2B_HUMAN	0.0630307	-0.0368434	-0.0137275	0.00875622	-0.019614	-0.0175008	0.0484277	-0.00063483	0.0176911	-0.0608279	-0.00592389
LTBP1_HUMAN	-0.0160109	-0.0372926	-0.0551155	-0.0367059	0.0174539	-0.00075293	-0.0235629	-0.0108822	-0.00750646	0.0231717	-0.00447921
TM2D1_HUMAN	-0.0149473	-0.0380544	0.0100423	-0.0139463	-0.0236137	-0.0172194	0.039303	0.0113757	0.0238283	0.0375351	-0.00524894
CTR2_CANFA	-0.0412051	-0.0383294	0.0351327	0.216564	-0.0534177	0.040368	0.00407958	0.0599273	-0.0785254	-0.0248569	-0.0116543
DDX56_BOVIN	-0.000698432	-0.0384874	0.0376181	-0.00946443	-0.0265473	-0.0139377	0.0190536	-0.0108483	0.00606288	0.0229544	-0.0113387
AATC_BOVIN	-0.00824875	-0.0388881	0.0244777	-0.0306149	-0.055645	-0.0165863	0.0273627	-0.022508	-0.0262687	-0.00868705	0.0431941
NTM1A_RAT	0.00156647	-0.0389747	0.0208068	-0.025098	-0.0074431	0.0160747	0.0203419	0.0285599	-0.0353489	0.00678232	-0.0163788
TGM1_CANFA	-0.0338051	-0.0391559	-0.0629855	0.0701734	-0.0204662	0.0233006	0.02716	-0.0243221	0.00168896	-0.0460649	0.0301621
SDE2_MOUSE	0.0615859	-0.0396856	-0.00308602	0.0144813	-0.0352765	0.0526505	0.0302359	-0.0147311	-0.0376606	0.0148888	-0.00551599
APRV1_HUMAN	-0.0433204	-0.0399488	0.00257542	-0.0106539	0.00296842	0.00501617	0.0394034	0.044388	0.011248	0.0400081	0.00436787
PRDX2_MACFA	-0.014641	-0.0408102	0.0493365	-0.0603828	-0.0271055	-0.0605914	0.0120434	0.00371579	0.0394913	-0.0240149	0.0243518
NDUA3_BOVIN	0.0667131	-0.0413903	-0.013448	0.050309	-0.036431	-0.014314	0.0078342	0.0435759	0.0531571	0.0701506	-0.0369003
FASTK_HUMAN	0.0764729	-0.0414978	-0.00946984	0.0526512	-0.0487484	-0.076945	0.0284502	-0.0624076	-0.119513	-0.0491454	-0.00241745
ANR22_HUMAN	-0.0531545	-0.0421857	-0.0198621	-0.0120042	-0.0145667	-0.0300455	-0.0138161	-0.0282444	0.0127718	0.00970358	0.023356
MT1F_PIG	0.0818887	-0.0428816	-0.0384254	-0.000883465	-0.0211361	-0.00415131	-0.0201287	-0.0288597	0.0559221	-0.00342396	-0.0478816
DEN5B_HUMAN	-0.0184491	-0.0430896	0.00172407	0.026817	0.00755731	-0.0135628	0.0556907	-0.005315	0.0115788	0.0536847	0.00629524
SDHL_HUMAN	-0.011123	-0.0431928	0.0109791	0.00915379	0.0231386	-0.0106964	0.00202282	0.00824398	0.00160869	-0.0207907	-0.00347321
KLDC2_HUMAN	0.0691272	-0.0432347	-0.0299029	0.0417078	0.0280794	-0.0539428	0.00637836	0.00332879	-0.0510346	-0.0428296	-0.00241355
GNMT_HUMAN	-0.0173221	-0.0434464	0.0324329	-0.00887771	0.00267704	-0.0212509	0.00439946	0.0145051	0.0729454	0.0525948	0.0230334
METK2_MOUSE	-0.00645373	-0.0436723	0.0792998	-0.0376043	0.0186989	-0.00582414	0.0140665	-0.000504123	-0.0316018	-0.0311875	-0.00182251
A2MG_HUMAN	-0.0103133	-0.0452847	-0.0100063	0.0484271	-0.0137436	-0.00295414	-0.0318975	0.0057859	-0.00618886	0.00328451	0.00740667
PAR3L_MOUSE	-0.0251078	-0.0453026	-0.0263646	-0.00605668	0.00924079	0.014758	0.00633622	-0.0373371	-0.0185934	0.0363518	-0.00528077
SOX15_MOUSE	0.0711911	-0.0454452	-0.0199483	-0.0373723	-0.0152595	0.0331055	0.0357159	0.0100438	-0.00459175	-0.068787	-0.0140917
ATTY_HUMAN	-0.0148143	-0.0461569	0.0073445	0.017064	0.00276771	-0.00011	-0.00427836	-0.00655934	0.0121156	0.000386479	-0.00231376
CO8B_HUMAN	-0.0148143	-0.0461569	0.0073445	0.017064	0.00276771	-0.00011	-0.00427836	-0.00655934	0.0121156	0.000386479	-0.00231376
PSMD2_MOUSE	0.10978	-0.0470409	-0.0224934	-0.00447768	-0.0463909	-0.0216222	0.0386201	0.0586344	-0.00578145	0.0591117	-0.02135
MCUB_HUMAN	-0.0198524	-0.04885	-0.0382125	-0.0101994	-0.0150695	-0.00546244	-0.00724308	0.0159832	0.0188351	-0.00544845	-0.00109984
HEP2_HUMAN	-0.0157425	-0.0496671	0.00941984	0.0197475	0.00300167	-8.6258e-05	-0.00448684	-0.00688486	0.013008	0.00023106	0.00391566
PH4H_HUMAN	-0.0157425	-0.0496671	0.00941984	0.0197475	0.00300167	-8.6258e-05	-0.00448684	-0.00688486	0.013008	0.00023106	0.00391566
KLC3_BOVIN	-0.0333443	-0.0516455	-0.0972653	-0.0437001	-0.0418042	0.0308251	-0.0474545	-0.022233	-0.0184665	-0.0325273	-0.00504756
CI078_HUMAN	-0.0256218	-0.0539321	0.0122623	0.00118874	-0.0228023	0.0448846	-0.101231	-0.0685683	0.0707282	0.00298671	-0.0392751
TRFE_MOUSE	-0.0223328	-0.0559042	0.00550894	0.0272213	-0.000552787	0.00279056	-0.0159059	-0.0119132	0.0186002	-0.0120932	-0.00136727
CO9_HUMAN	-0.0155808	-0.0562606	0.00249537	0.0179639	-0.0060936	-0.00521574	0.00175412	0.0130821	0.0159499	0.00202707	0.00366707
CNOT1_DANRE	0.0879868	-0.0565687	-0.0164186	-0.0187204	-0.0531996	-0.0476186	0.0266549	0.0426595	-0.0205968	-0.0186091	0.0135418
PA2GA_HUMAN	-0.0491442	-0.0578851	-0.030718	0.0883164	-0.0631194	0.0202393	-0.0662557	0.0634894	0.0702136	-0.0786941	0.0044464
LGMN_PONAB	0.0852777	-0.058145	-0.0203106	0.0256241	0.136668	-0.217149	-0.120838	0.0367832	-0.0492876	-0.00136781	0.0048274
KLK6_HUMAN	-0.0438081	-0.05897	0.0152641	-0.105129	-0.0416784	-0.0561831	-0.0893284	-0.0537741	0.0123066	-0.0994965	-0.0100799
CYLD_MOUSE	-0.0430342	-0.0594398	0.00953008	-0.0216829	0.00232507	-0.0212916	0.0104078	0.0164828	0.0162177	0.00893368	-0.0113697
SFTPD_MACMU	-0.017014	-0.0597583	-0.0351528	0.0125411	0.000267358	-0.0394216	0.0160081	0.0449196	-0.0594843	0.0253937	-0.00243073
CO4_RAT	-0.00262542	-0.0620485	0.000595181	0.0524364	-0.00936754	0.00139879	0.0102265	0.00126439	0.00841972	-0.0175443	0.0098689
DPH3_MOUSE	0.00402457	-0.064992	-0.030041	-0.011293	0.0117301	-0.0547578	-0.00947601	0.0390029	0.096753	-0.0294753	0.0419945
APOC4_MOUSE	-0.0249422	-0.0674491	0.0148224	0.0145556	0.00212154	-0.0100501	0.00912575	0.00946745	0.015892	0.0120866	-0.00475053
ALDOB_RABIT	-0.0239477	-0.070452	0.00126231	0.0195844	-0.00165853	0.0140845	-0.000274169	-0.0209609	-0.0110033	0.0171802	3.42158e-06
FGL1_BOVIN	-0.0205533	-0.0714947	-0.0127952	-0.00639183	0.00131006	-0.0158559	-0.0185788	0.0134426	0.0346523	0.0393005	-0.00695744
CPSM_MOUSE	-0.0208821	-0.0718295	0.0167652	0.0313109	-0.00747161	0.027551	-0.001676	-0.0296713	-0.0331482	0.0171799	-5.02975e-05
RET1L_HUMAN	-0.0391508	-0.0724532	0.0235165	0.0684505	-0.0339713	-0.0285089	0.0889775	0.0402568	0.0477079	0.0321444	-0.0126339
THRB_PIG	-0.0285152	-0.0733427	0.0116725	0.0114997	0.00668823	-0.00800516	0.00500489	-0.00168145	0.0169591	0.0123406	-0.00353029
CFAB_PONPY	-0.0210172	-0.0778414	0.0147954	0.0423024	-0.0144853	-0.00507095	-0.0393893	-0.00256585	-0.0246222	-0.0348957	0.00535878
ANT3_MOUSE	-0.0236917	-0.0797086	0.00712964	0.0151689	0.019028	0.0017766	0.0062991	-0.00367539	-0.0181528	-0.00482306	0.00200345
CP2E1_PIG	-0.0262482	-0.0809824	-0.00814254	0.0115122	0.00258943	-0.00168572	-0.00774897	-0.00966217	0.0216801	0.00288748	0.000306008
ITIH4_HUMAN	-0.0239665	-0.0815399	-0.00199271	0.0128233	-0.00495889	0.0161325	-0.012022	-0.0240247	-0.0071628	0.00322414	0.000586318
VTDB_HUMAN	-0.0283871	-0.0822005	0.00171801	-0.00188197	0.00159415	-0.00791595	-0.00593303	-0.000189639	0.0221527	-0.00154848	-0.00219809
SORCN_MOUSE	-0.0455255	-0.0864518	-0.0462424	0.0273547	-0.070515	-0.0170178	-0.033063	0.0865655	0.0529793	-0.0678325	0.0010668
KNG2_BOVIN	-0.0277653	-0.0958143	-0.0150045	0.0168826	-0.0183206	0.00532808	0.0110461	0.0133239	-0.00458544	0.0232761	-0.00203981
CO3_BOVIN	-0.0315555	-0.0973029	0.000977739	0.0155263	0.00636419	0.0222805	-0.0221809	-0.0515924	-0.00528569	0.0021369	-0.00720878
HPPD_BOVIN	-0.0334233	-0.100094	0.0408569	-0.0121033	-0.0317502	0.0423333	-0.0267502	0.0449437	-0.0774416	-0.0646854	0.0119338
APOH_CANFA	-0.0347767	-0.103999	-0.027665	-0.000444358	0.00168085	-0.00325496	-0.0102527	-0.0112709	0.0282507	0.00571689	-0.00212741
FIBG_HUMAN	-0.0386451	-0.110864	-0.00858674	-0.00196655	-0.00498316	0.00545718	0.000381644	-0.0108092	-0.00155119	0.0179706	-0.00245677
KAIN_HUMAN	-0.032258	-0.117648	-0.0188555	0.00974339	-0.0171992	0.009521	-0.00673613	-0.00126733	0.00232941	0.00706891	0.000436112
A1AT2_HORSE	-0.0777584	-0.118531	-0.0232764	0.0683233	-0.0435113	-0.0171112	-0.031007	0.0158045	-0.0230765	0.00290835	-0.0138001
FIBB_HUMAN	-0.0392332	-0.125203	-0.0111973	-0.00935431	-0.00886786	0.00689125	-0.0127924	-0.0128786	0.00405761	0.00164929	0.00604396
FETUA_PIG	-0.0585078	-0.152795	-0.0192226	-0.0156978	-0.0151948	0.0267869	-0.0234491	-0.040341	-0.0220843	0.00427948	-0.00475649
FIBA_MOUSE	-0.0548475	-0.170628	0.0281421	0.0440987	-0.00249288	0.00539132	-0.00118763	-0.0127945	0.0125344	0.0164803	0.000813679
HPT_PONAB	-0.0927663	-0.177408	-0.0255829	0.0117952	-0.0369919	0.026586	-0.0423583	-0.0548321	-0.0435616	0.018798	-0.00604438
APOC2_BOVIN	-0.0593913	-0.180697	0.00333659	0.0133885	0.00289001	0.0111714	-0.0241204	-0.0392378	0.0178167	0.000712768	-0.00886327
ALBU_CANFA	-0.0651885	-0.181734	-0.0267058	-0.0100168	0.00789186	0.0303893	-0.0270347	-0.0531806	-0.0356794	-0.0112195	-0.00835421
APOC3_MACFA	-0.0669111	-0.19799	0.0126451	0.051746	-0.0181673	0.00159697	-0.00762466	0.00636701	0.0267237	0.004794	0.00249474
HEMO_HUMAN	-0.0790423	-0.19964	-0.0098963	0.00691948	-0.00183207	0.0284415	-0.0239924	-0.0619938	-0.0109466	0.0169201	-0.00758901
A1AG2_HUMAN	-0.0772338	-0.201229	-0.0163153	0.0436258	0.020037	0.034532	-0.0102624	-0.0129753	-0.0154368	0.00849206	0.194081
APOA1_TARSY	-0.0650866	-0.203238	0.0125685	0.0329243	0.00310422	-0.0122197	-0.0135878	-0.00457603	0.054553	-0.000220527	-0.0145556
WFD18_MOUSE	-0.0844643	-0.232681	-0.00864774	0.0219096	0.0255611	0.00431969	-0.0119074	-0.0717916	0.0429322	-0.0230772	-0.0234511
